# Supplementary material
Source: PubMed Central journal article supplement (PMC4890966)

# QTL Linkage Analysis of Vascular Calcium Principle Components Chromosome 1

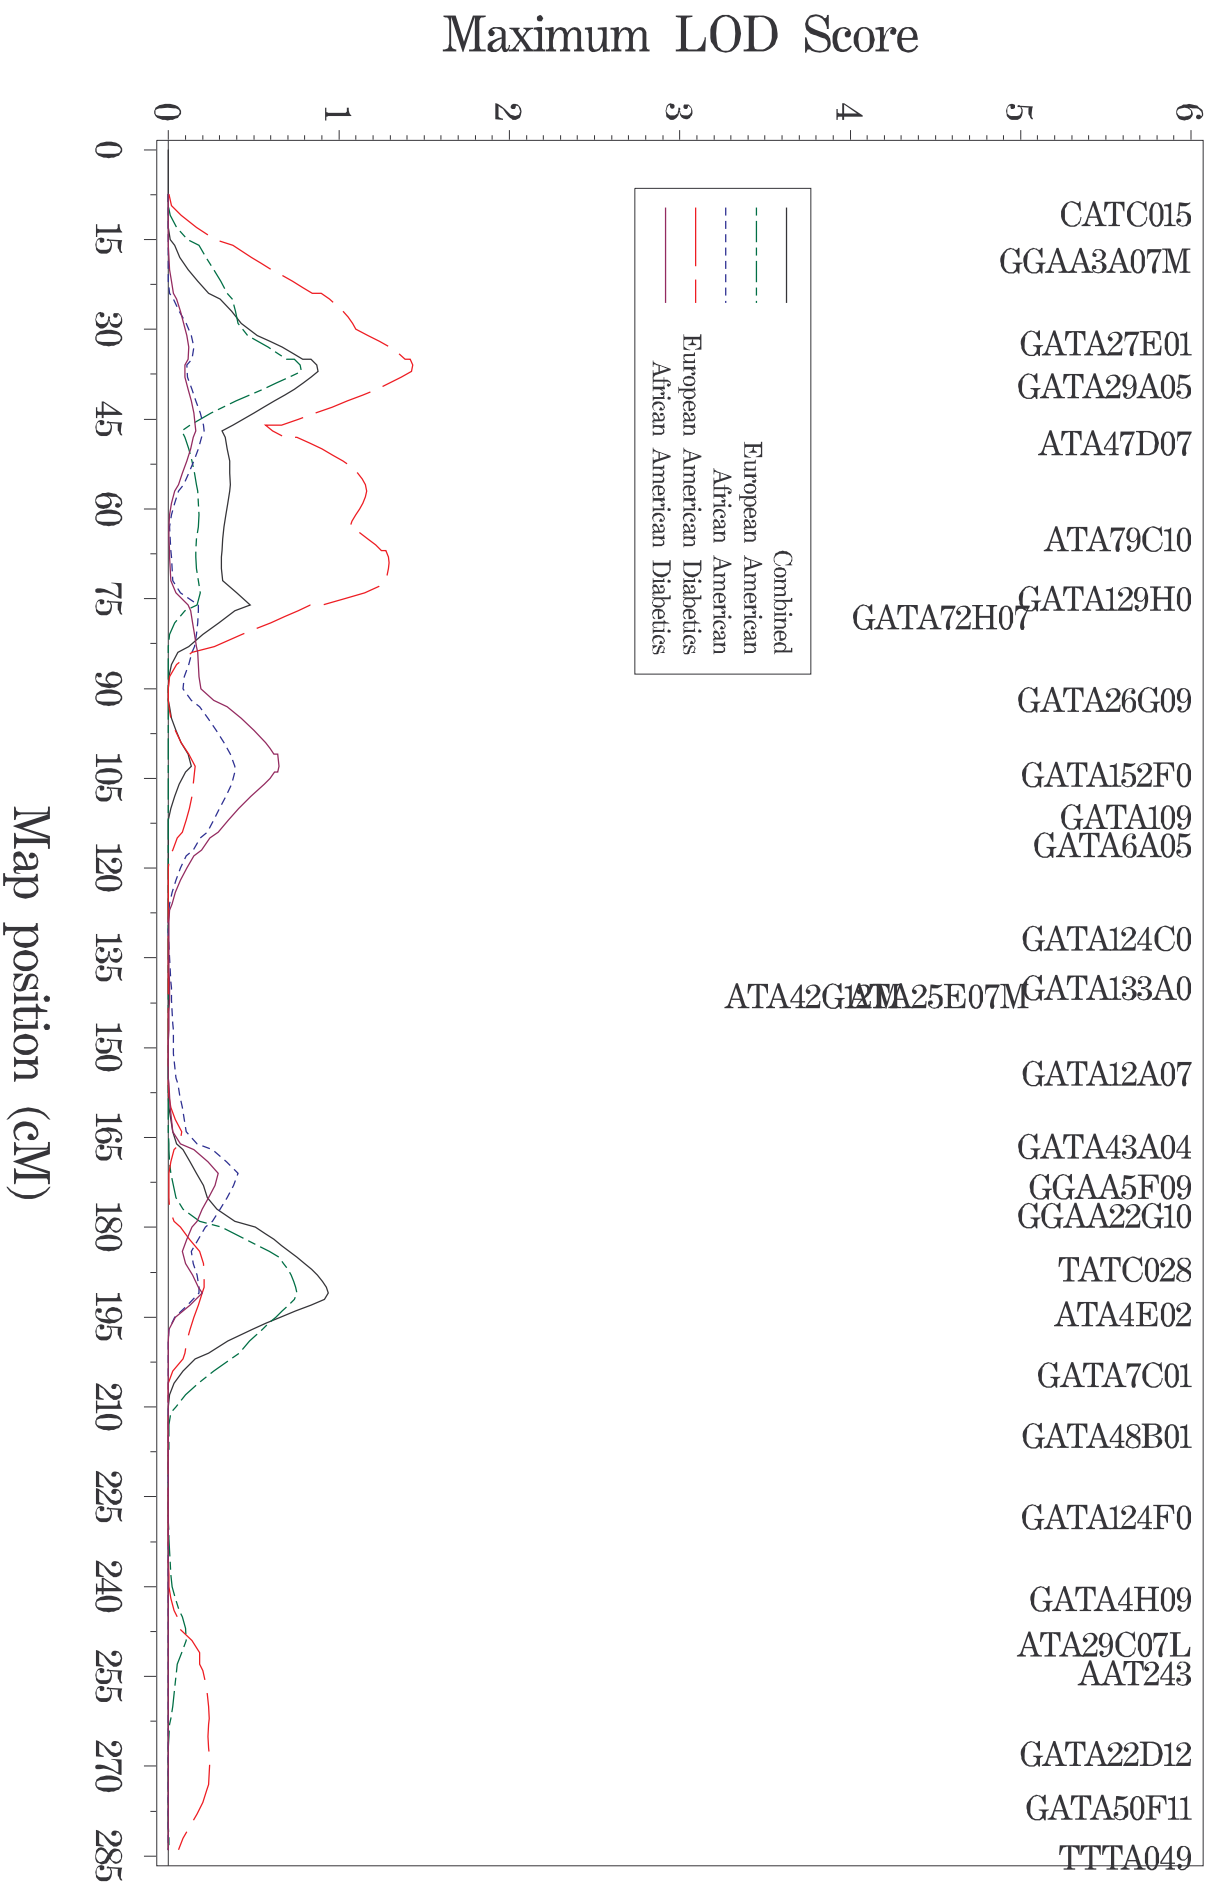

# QTL Linkage Analysis of Vascular Calcium Principle Components Chromosome 2

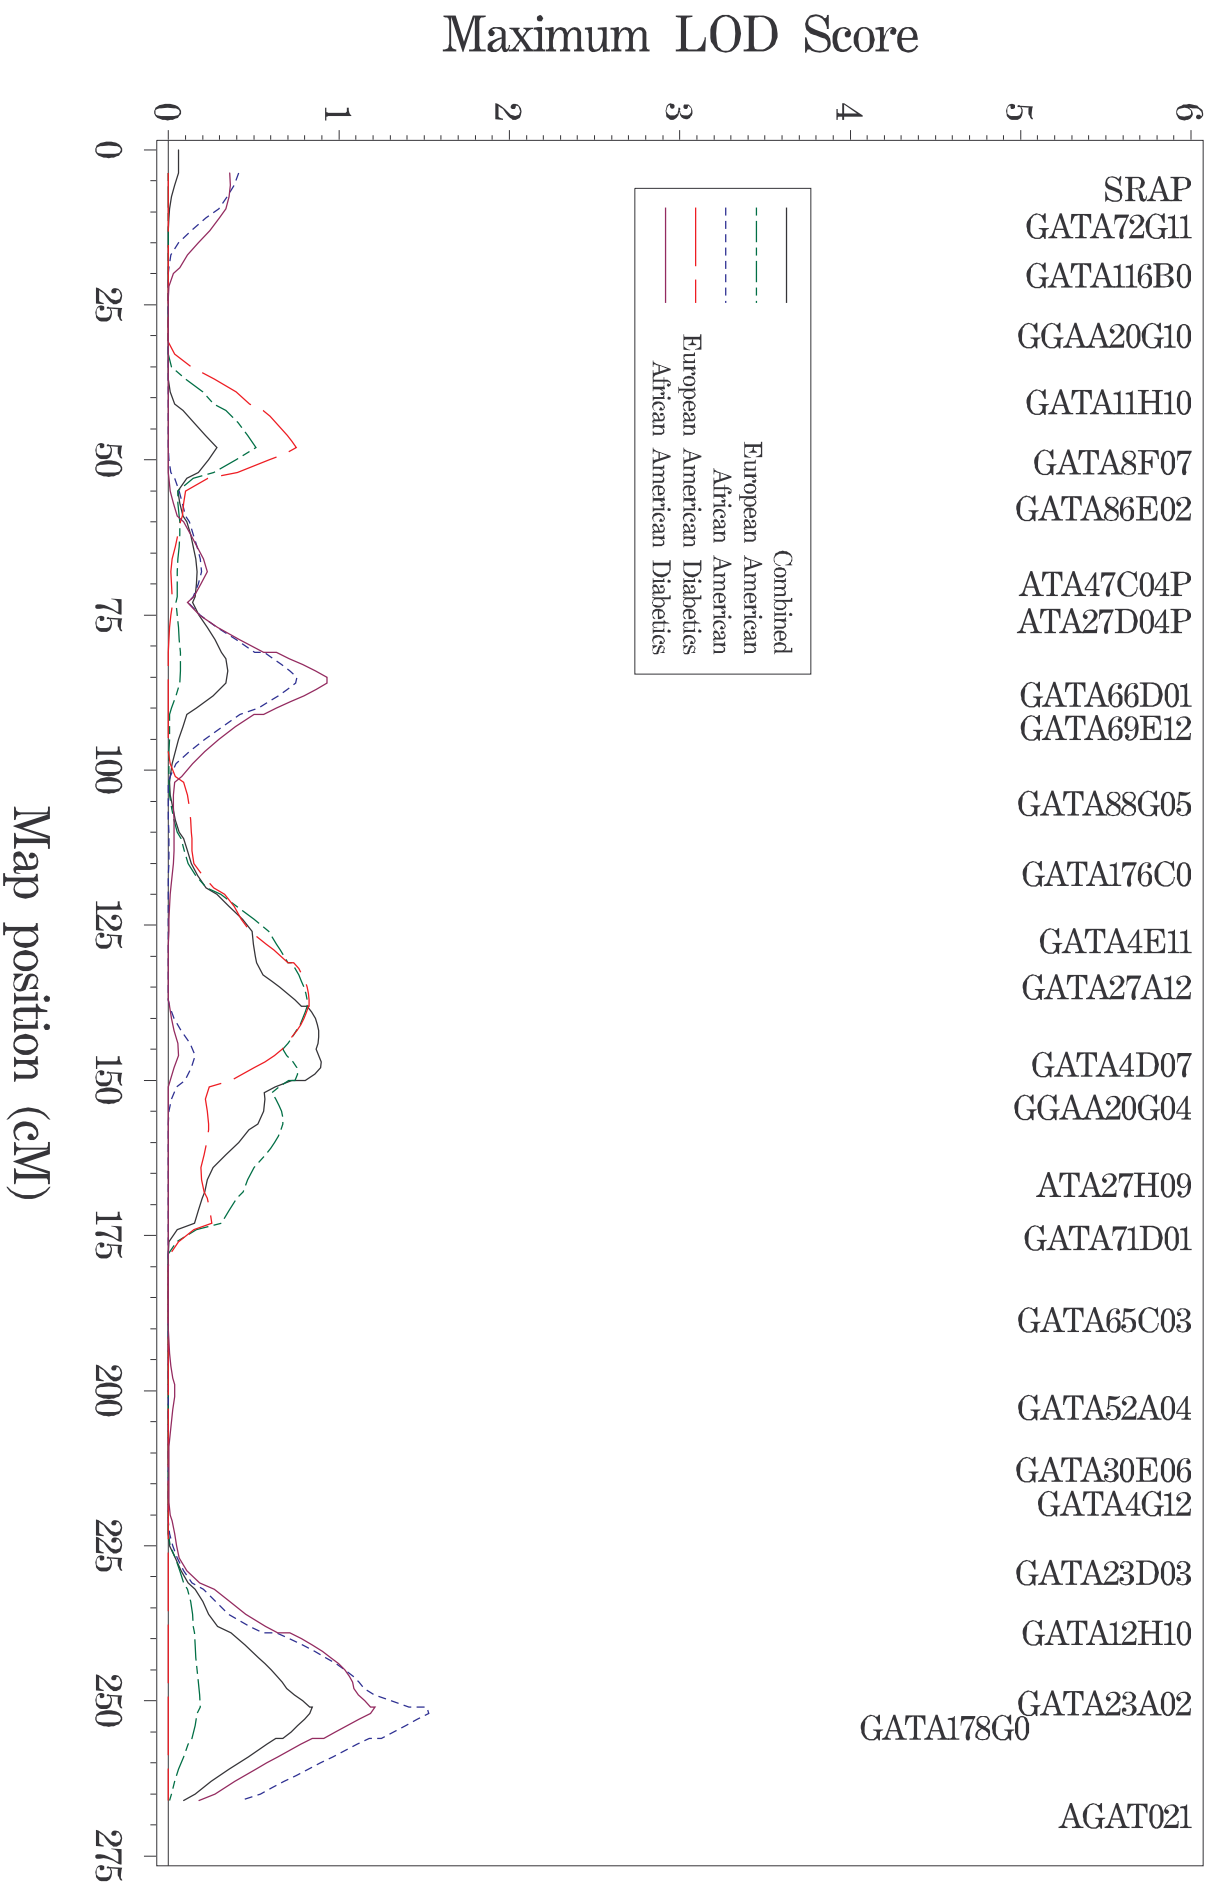

# QTL Linkage Analysis of Vascular Calcium Principle Components Chromosome 3

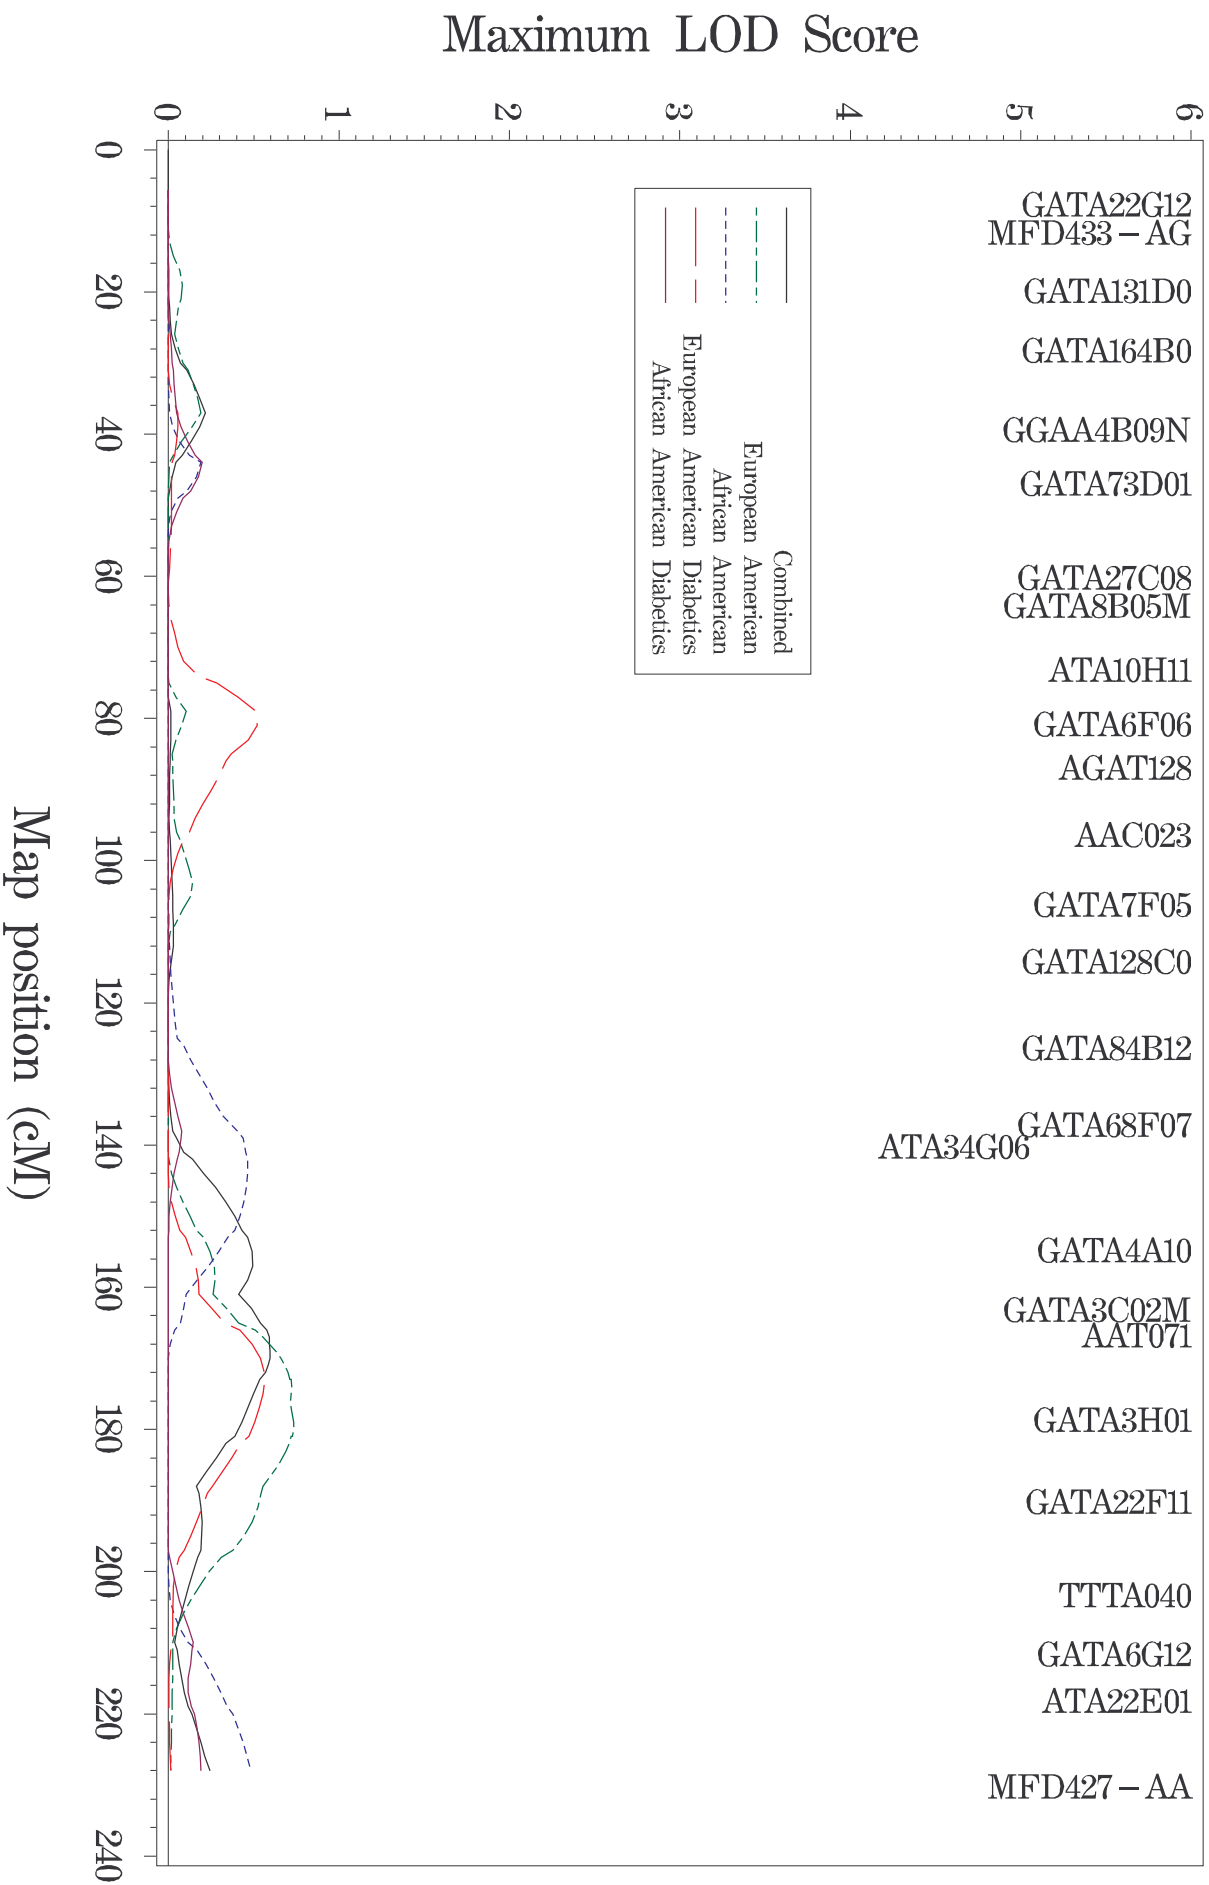

# QTL Linkage Analysis of Vascular Calcium Principle Components Chromosome 4

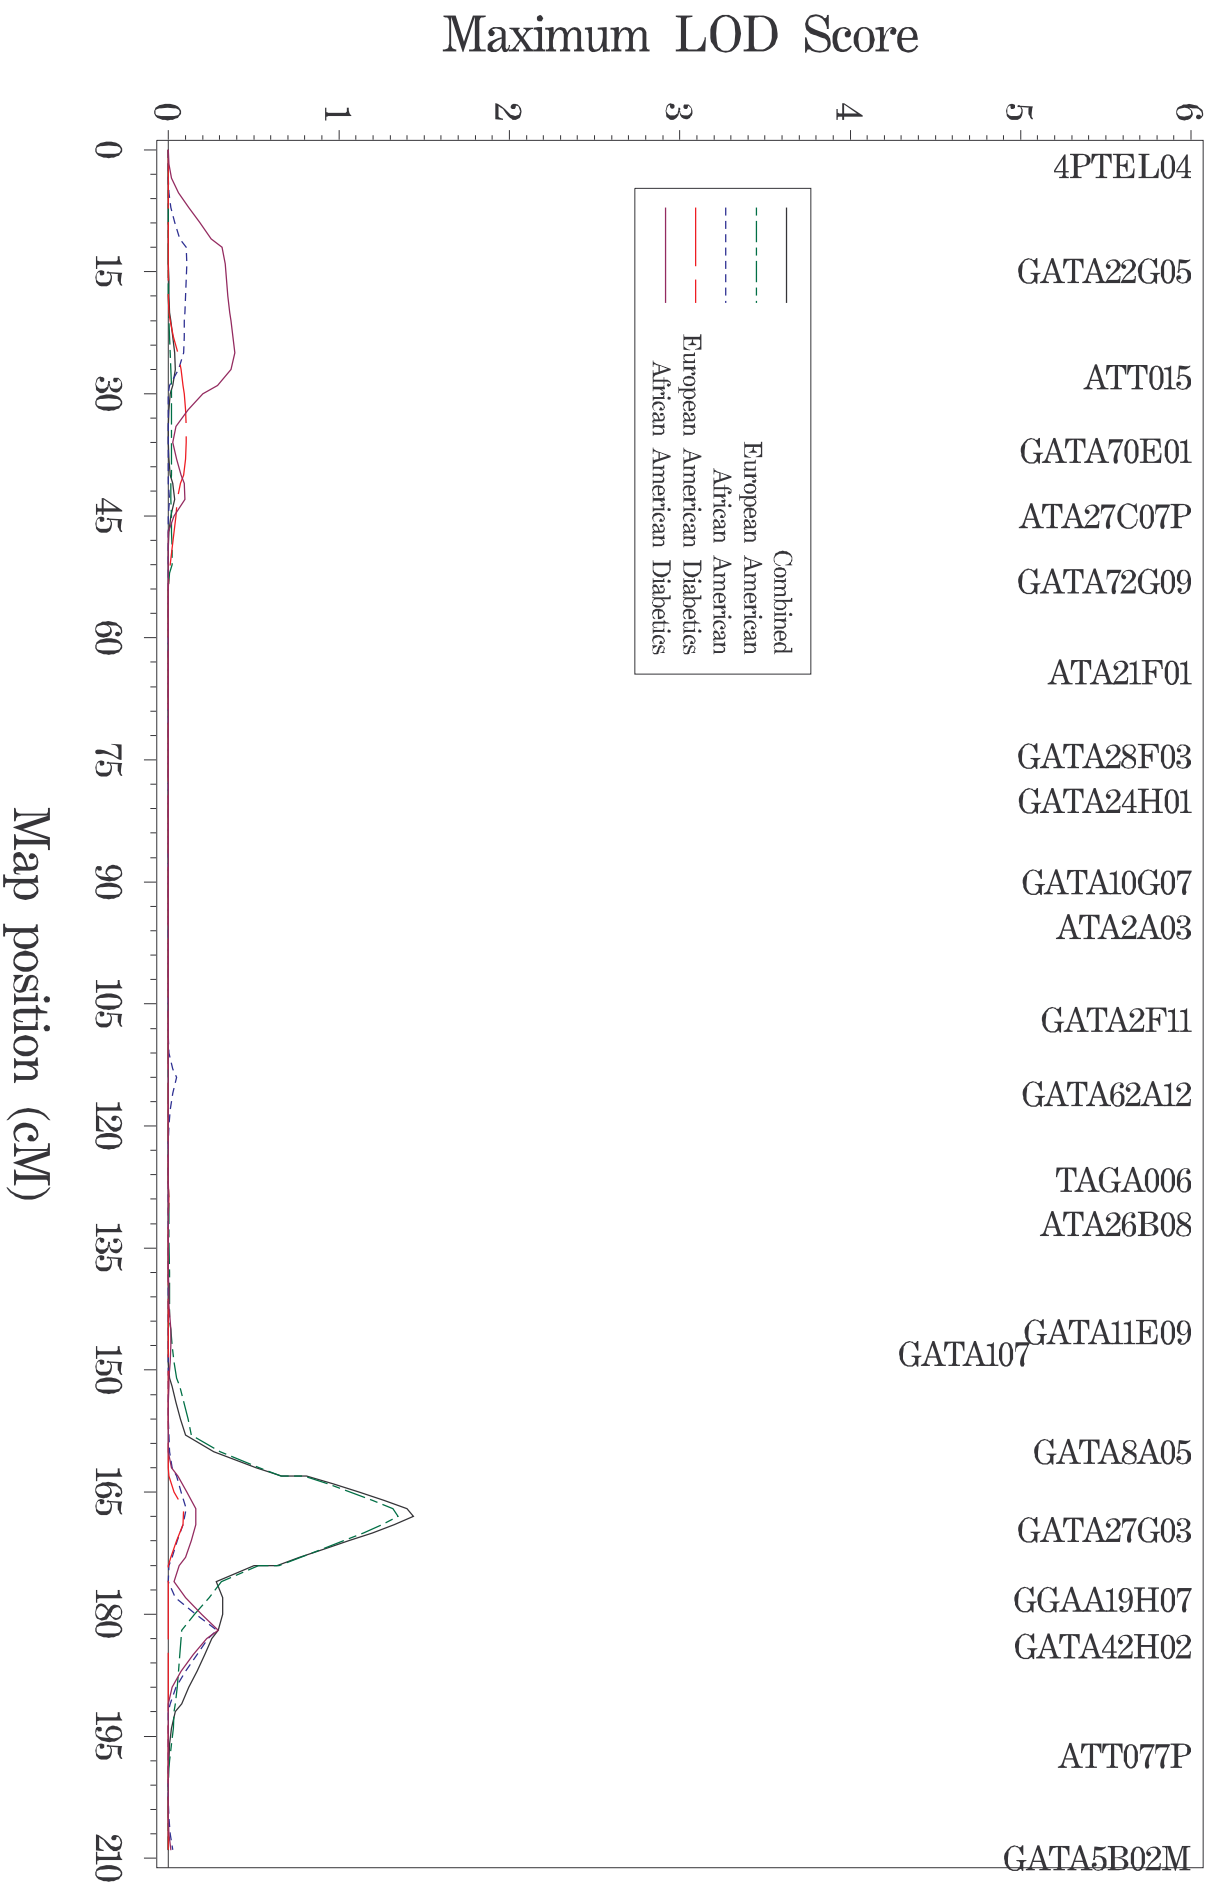

# QTL Linkage Analysis of Vascular Calcium Principle Components Chromosome 5

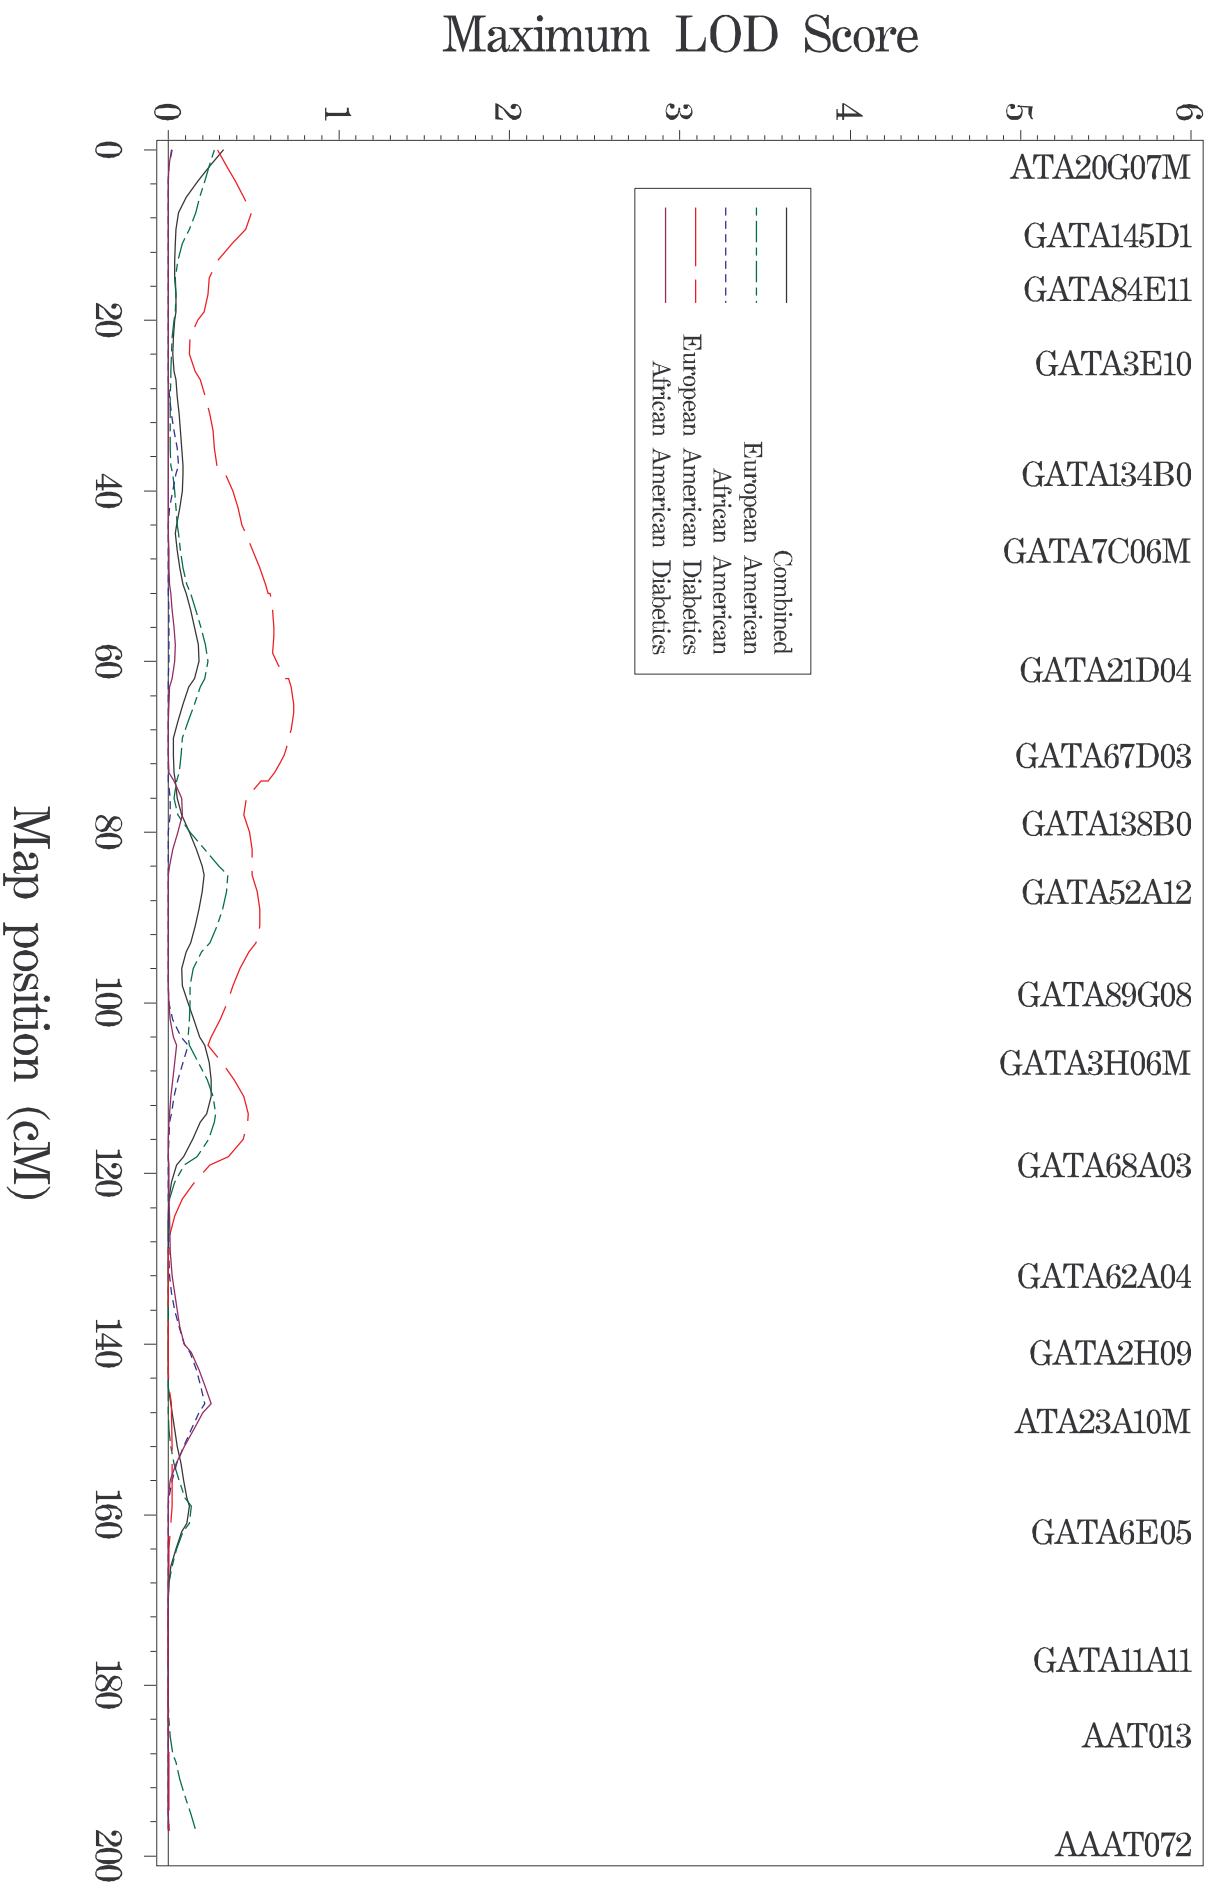

# QTL Linkage Analysis of Vascular Calcium Principle Components Chromosome 6

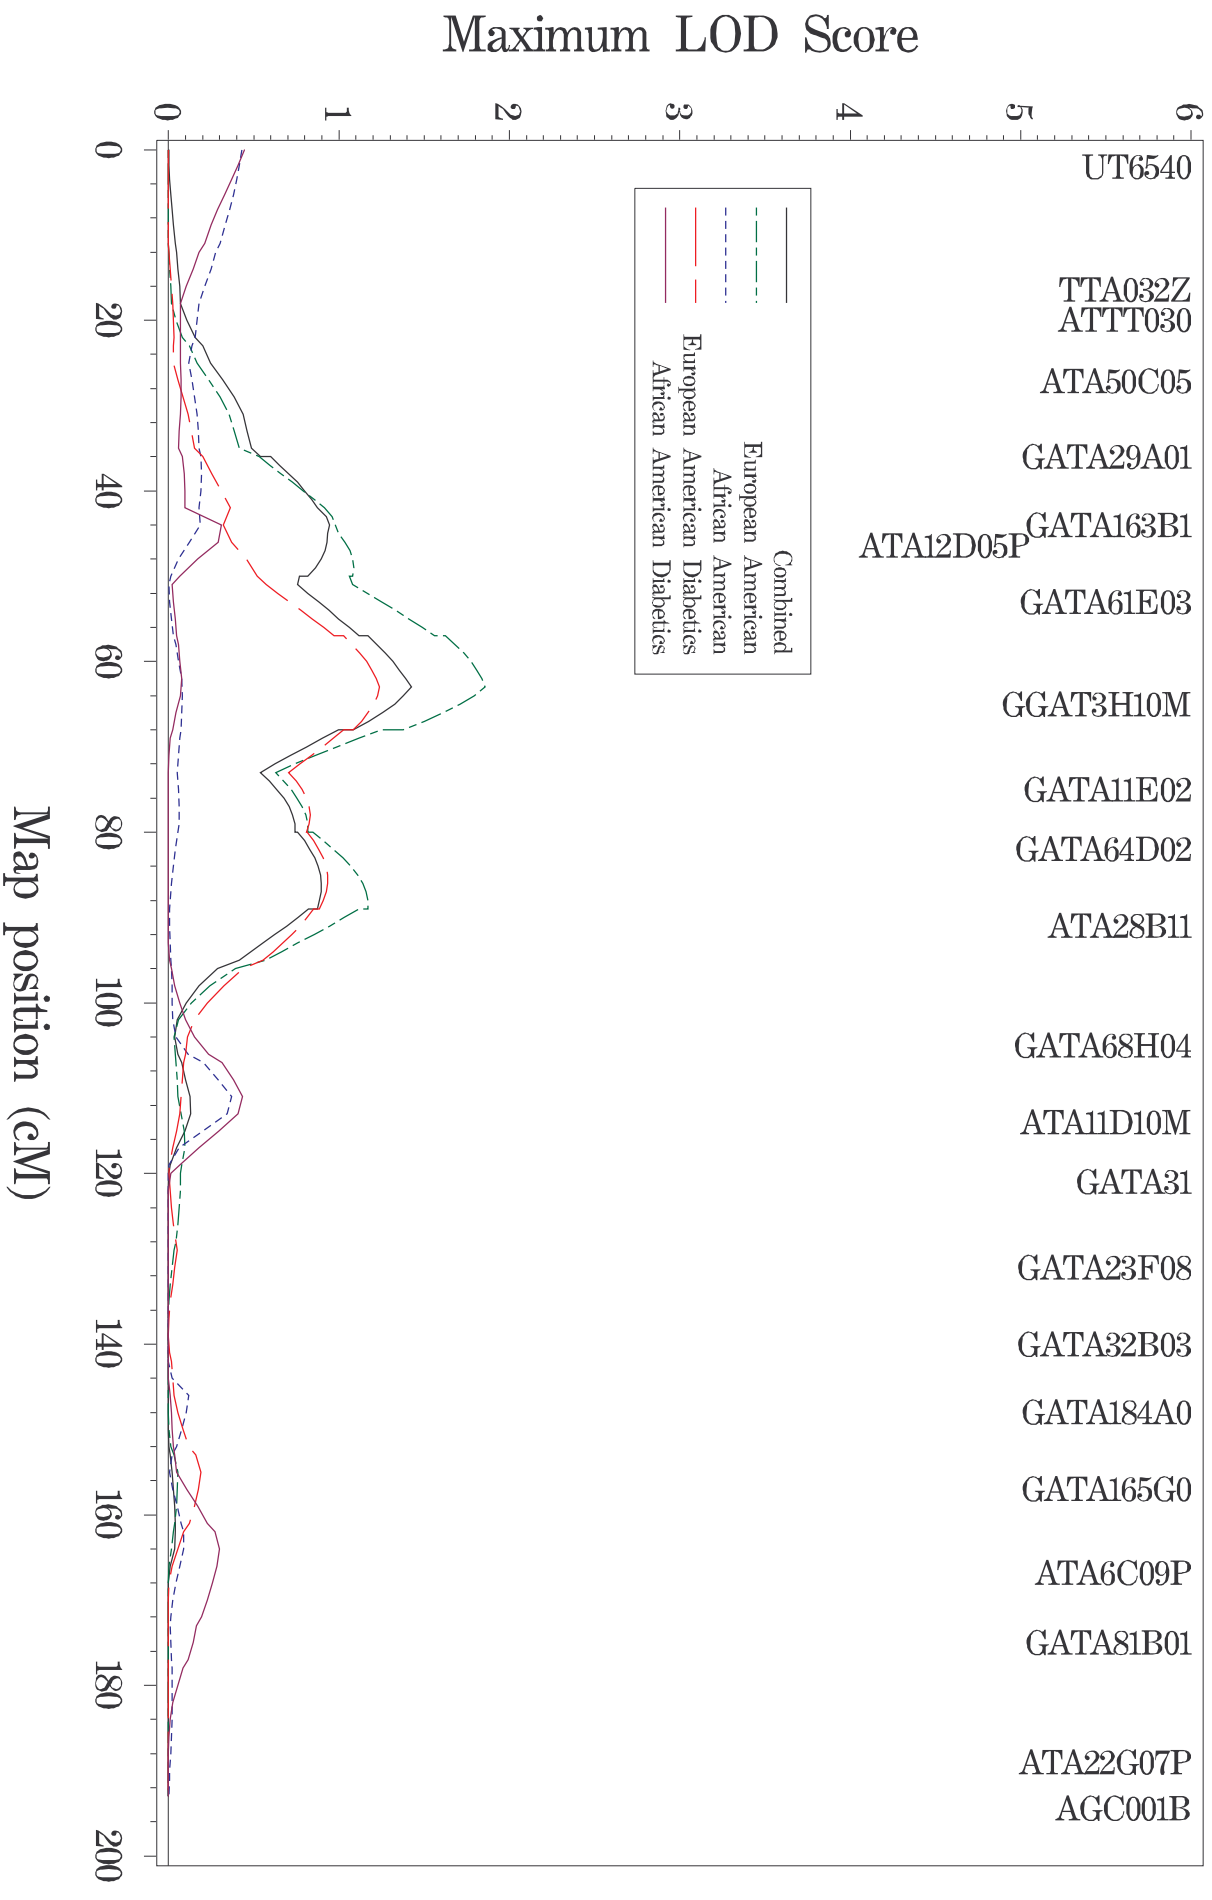

# QTL Linkage Analysis of Vascular Calcium Principle Components Chromosome 7

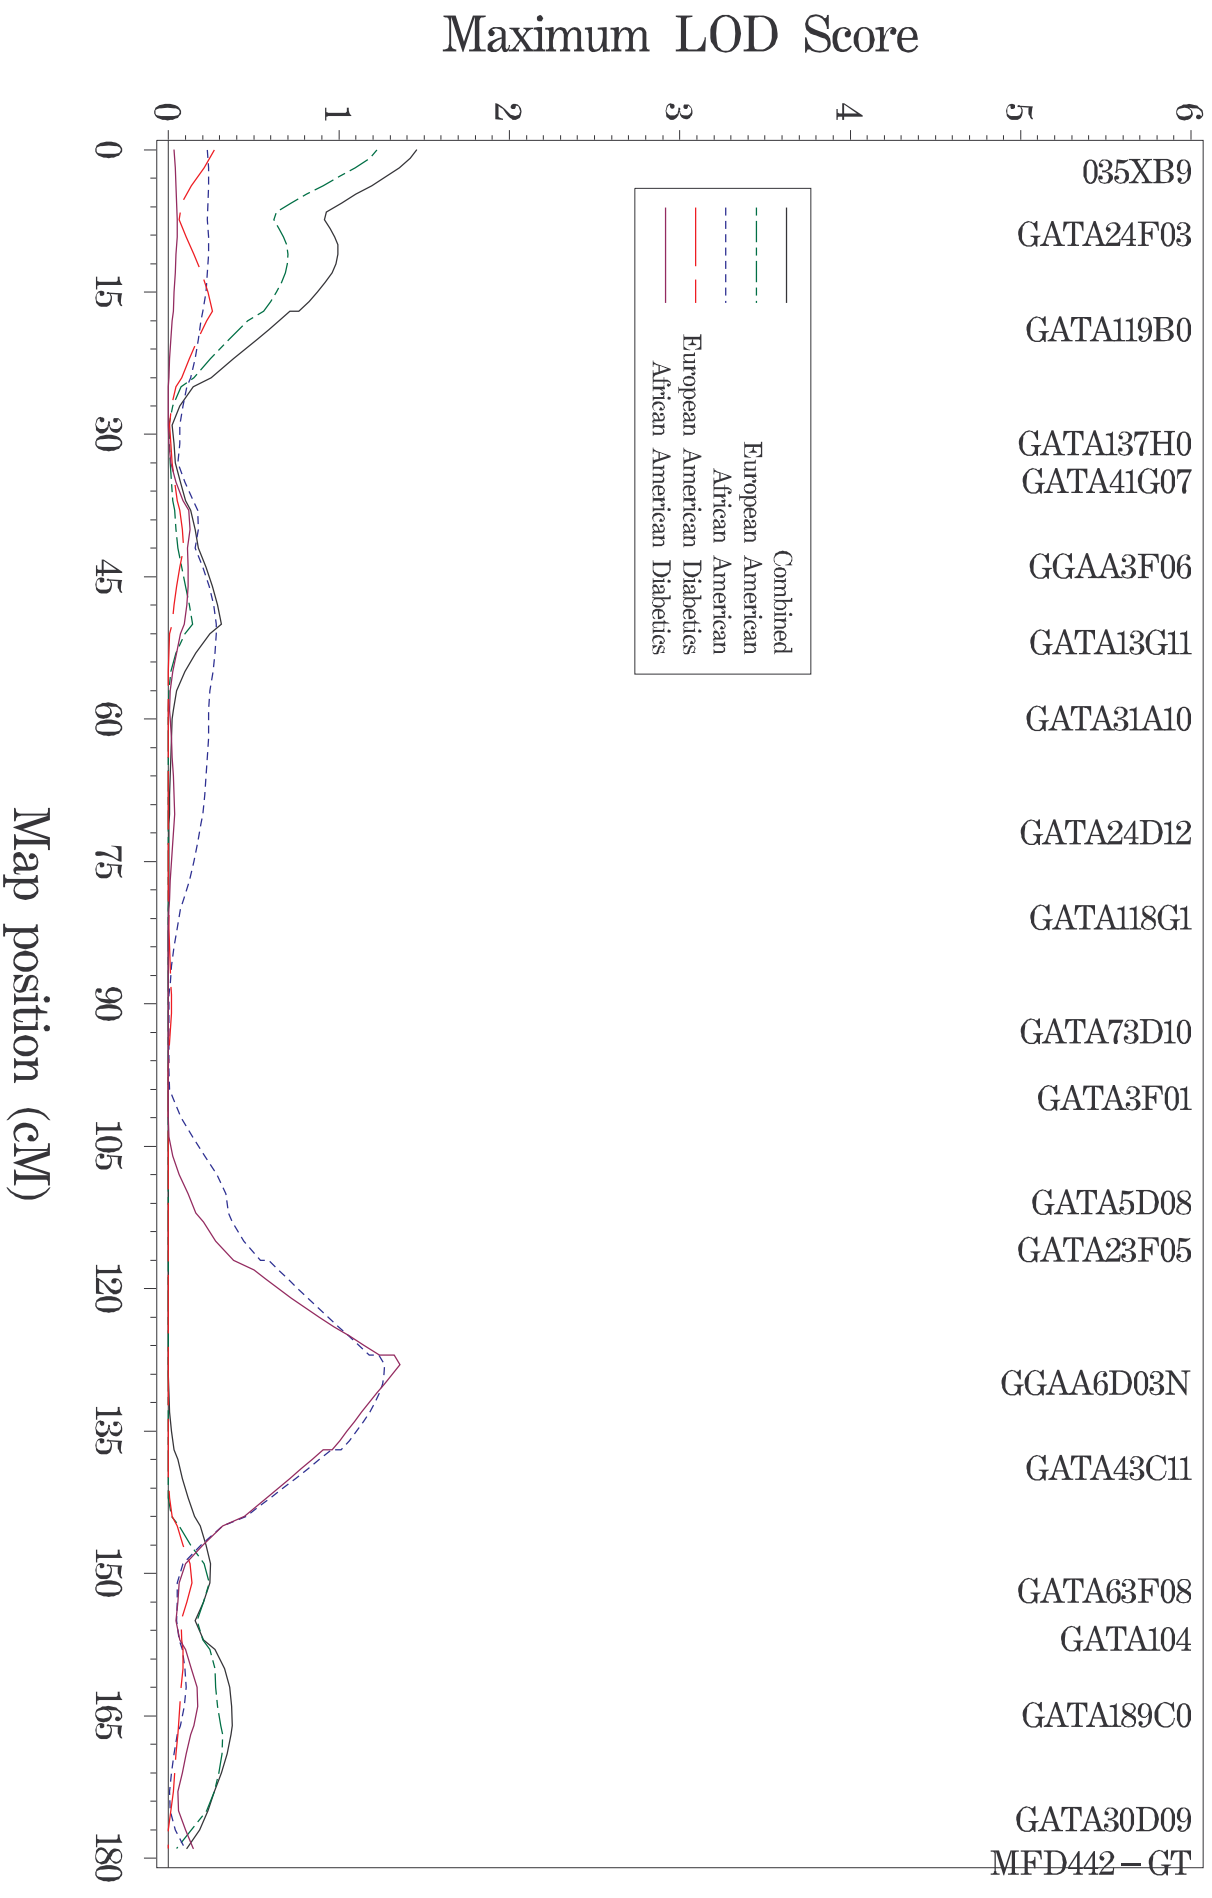

# QTL Linkage Analysis of Vascular Calcium Principle Components Chromosome 8

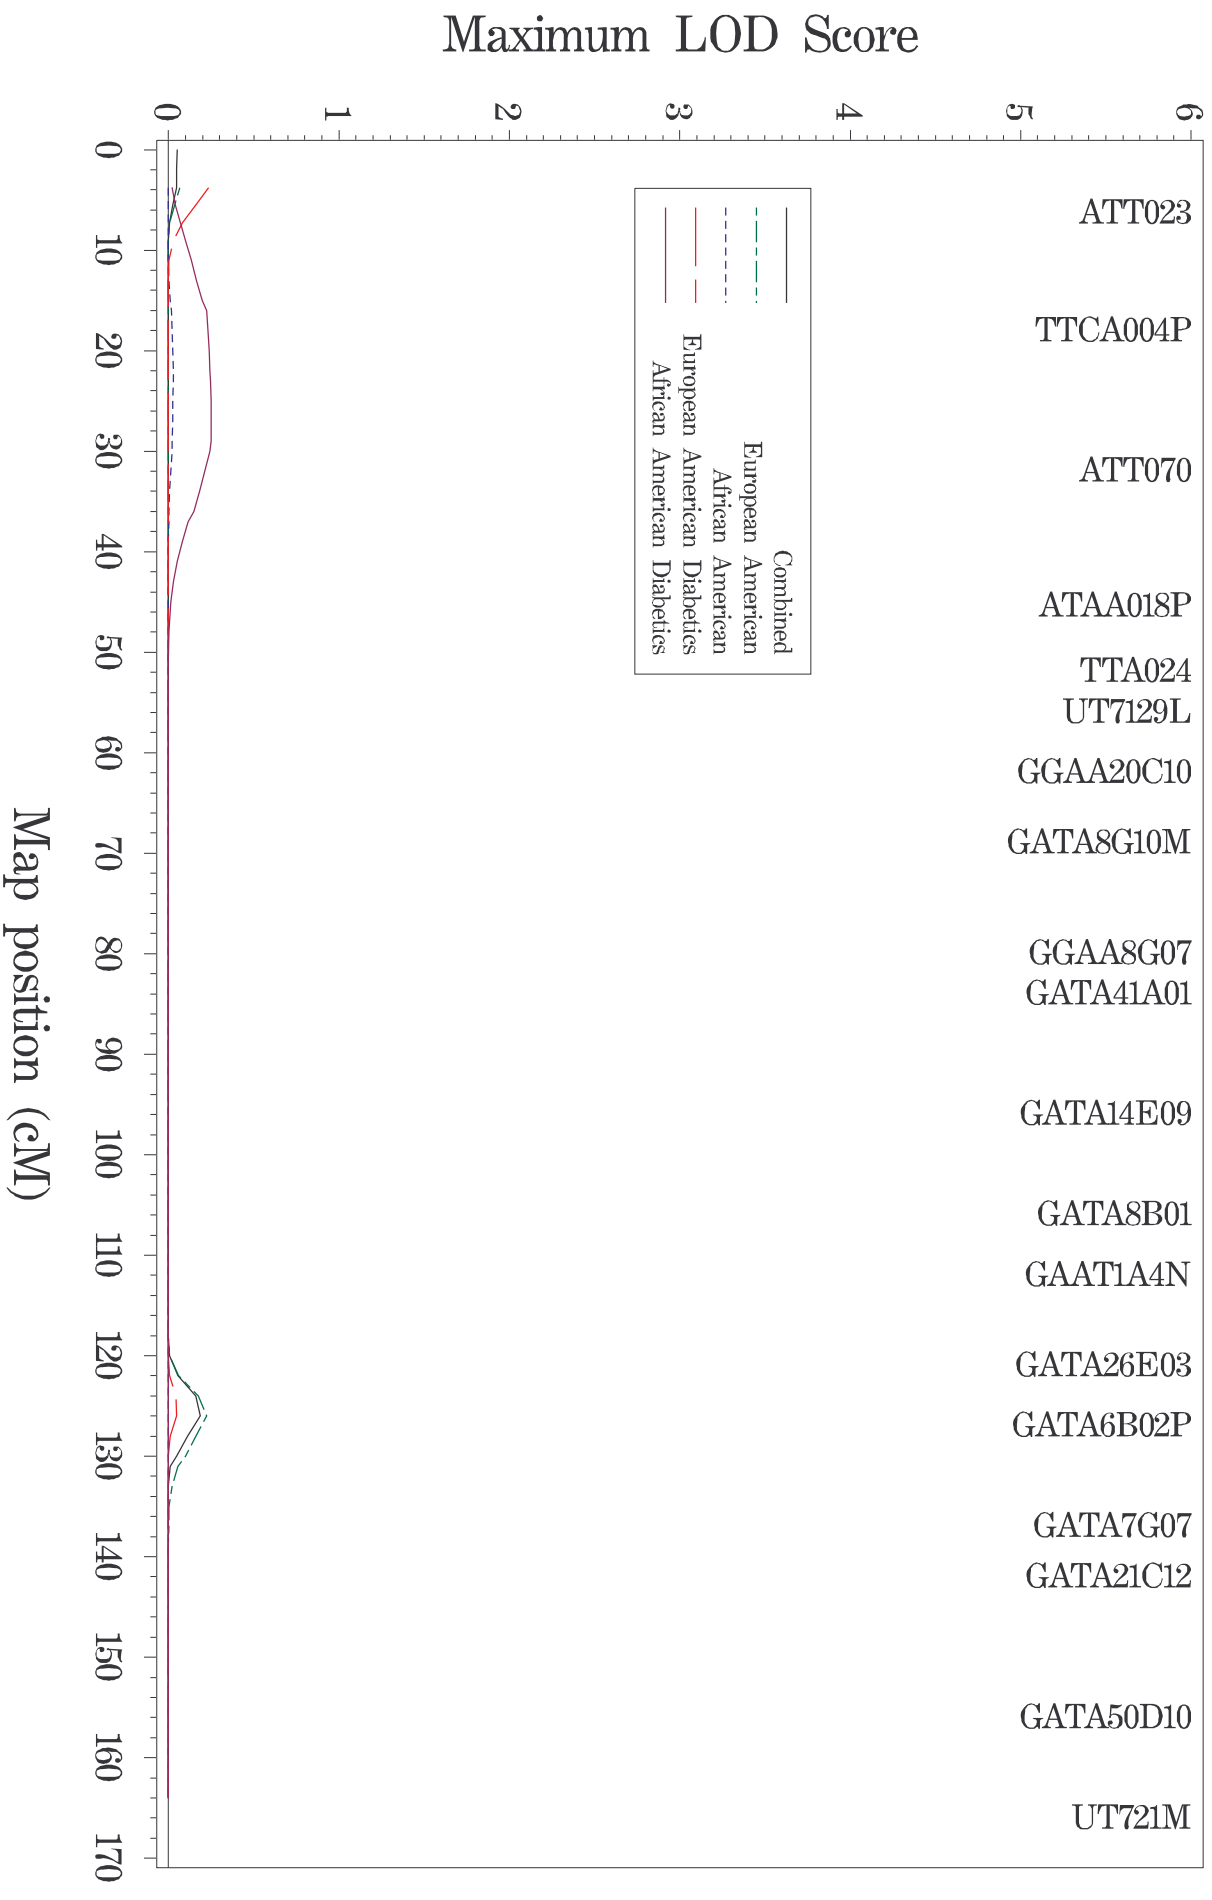



# QTL Linkage Analysis of Vascular Calcium Principle Components Chromosome 9

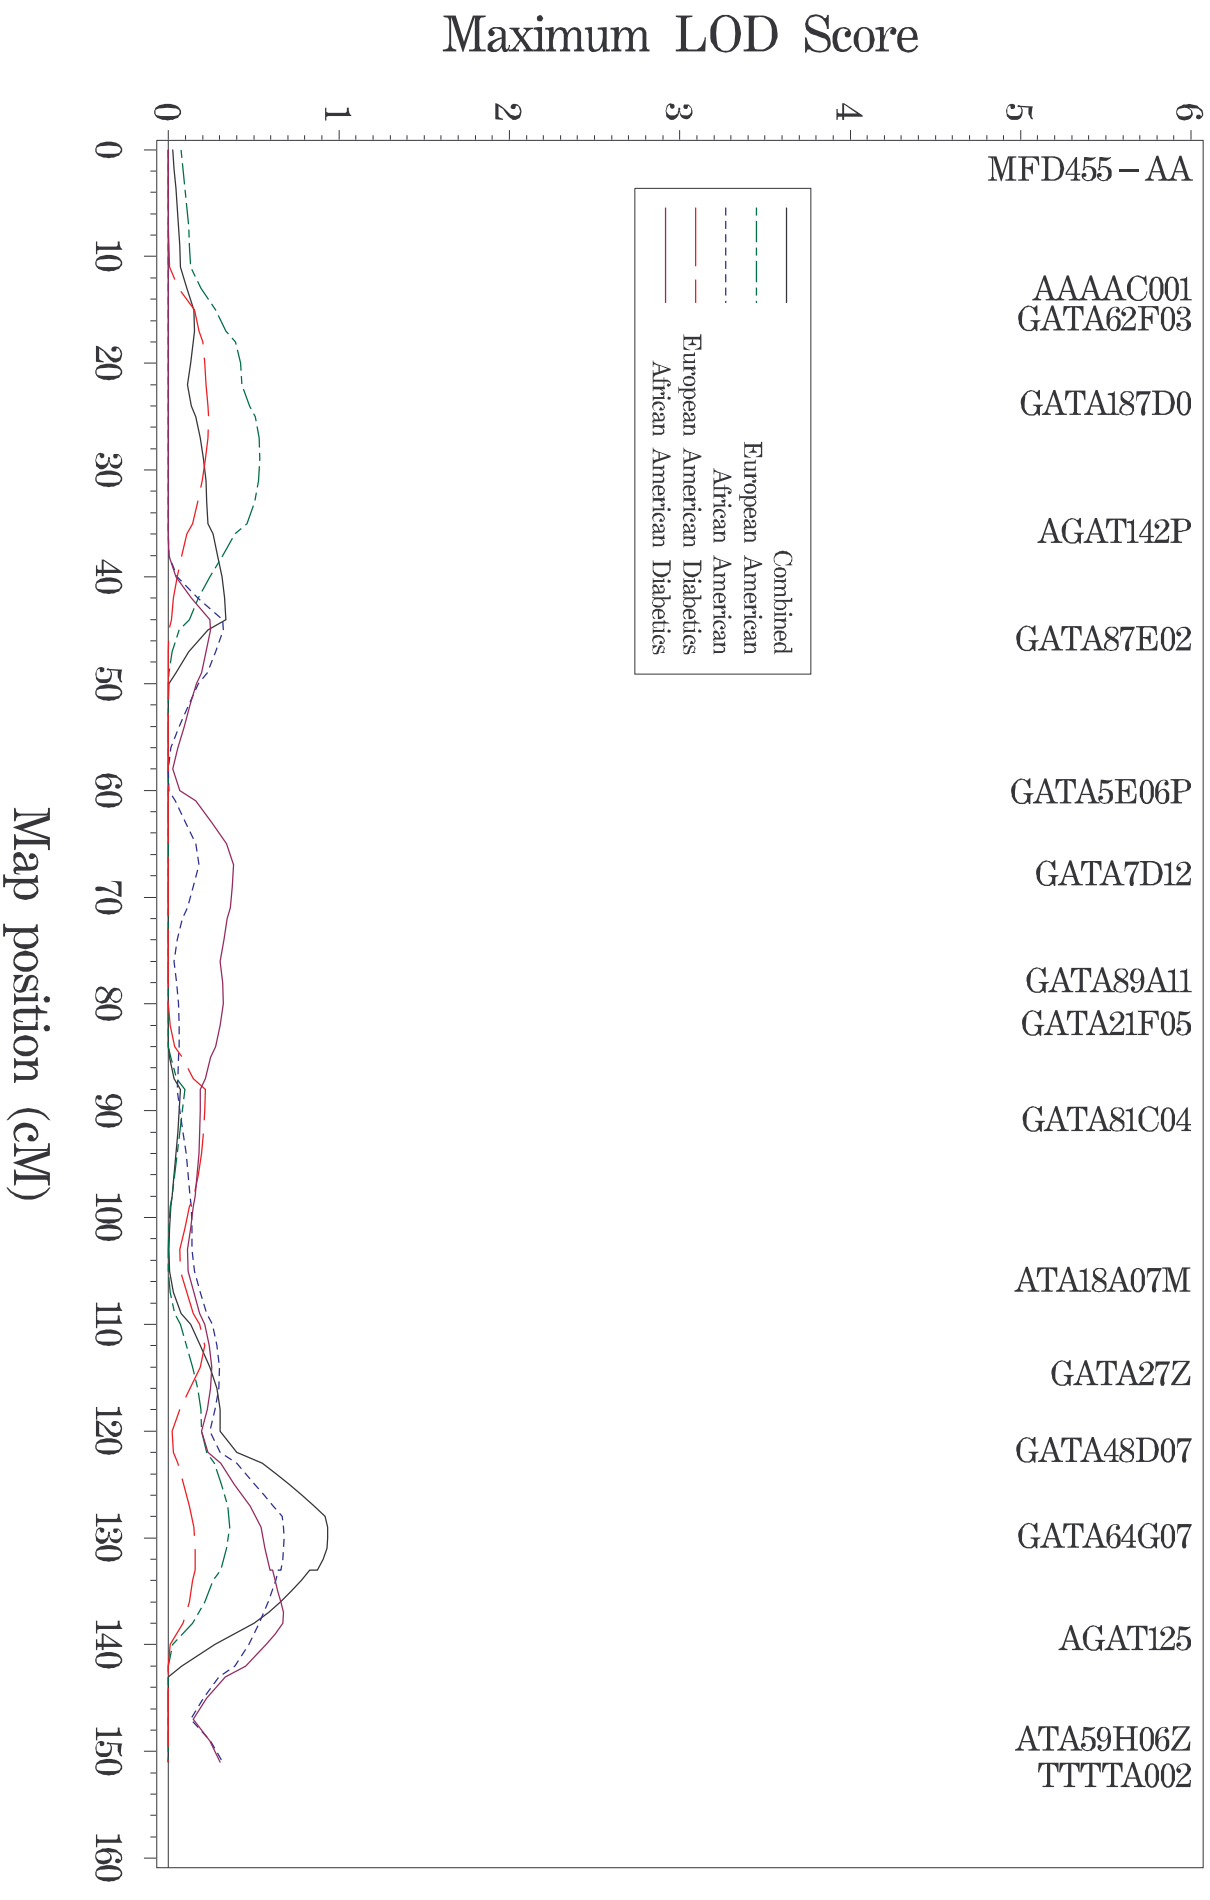

# QTL Linkage Analysis of Vascular Calcium Principle Components Chromosome 10

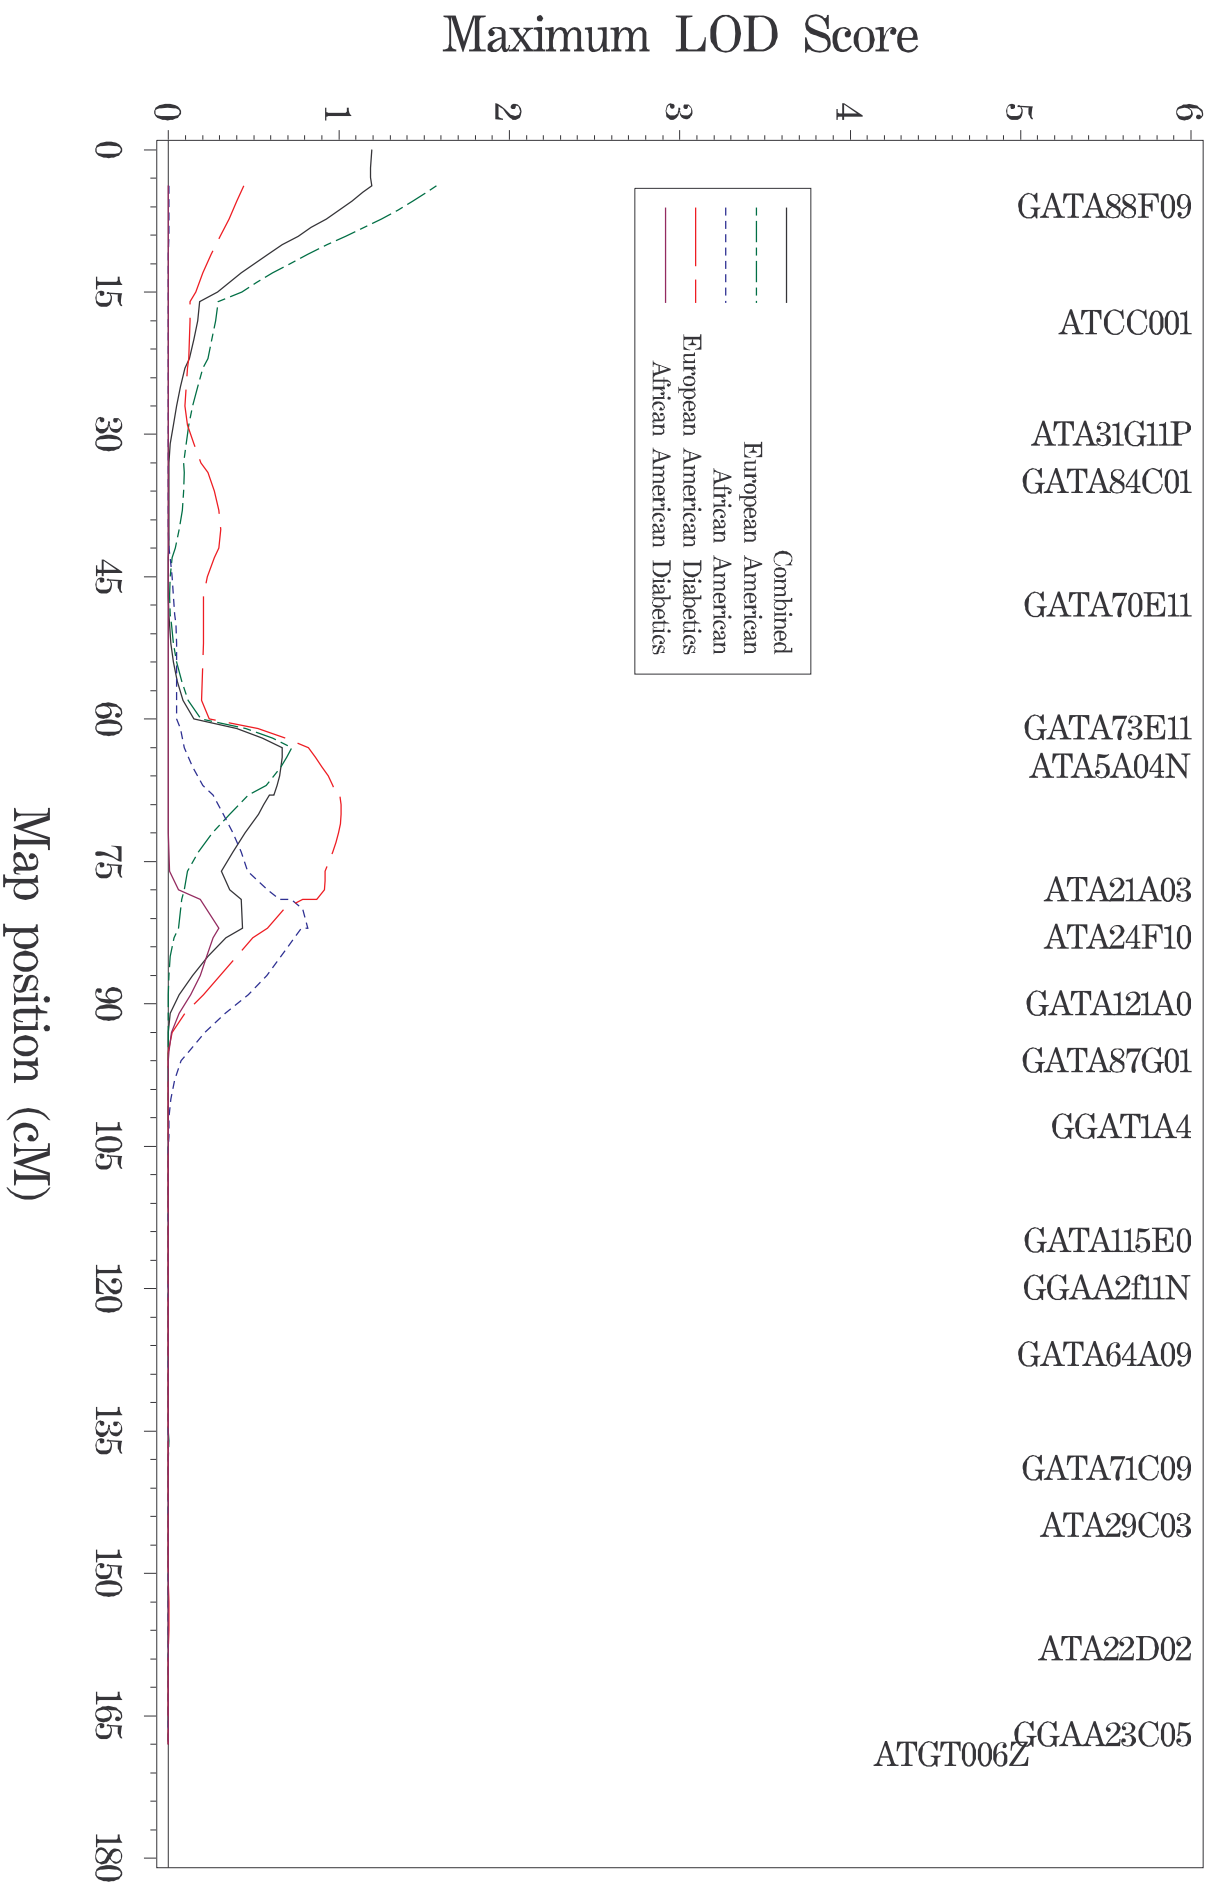

# QTL Linkage Analysis of Vascular Calcium Principle Components Chromosome 11

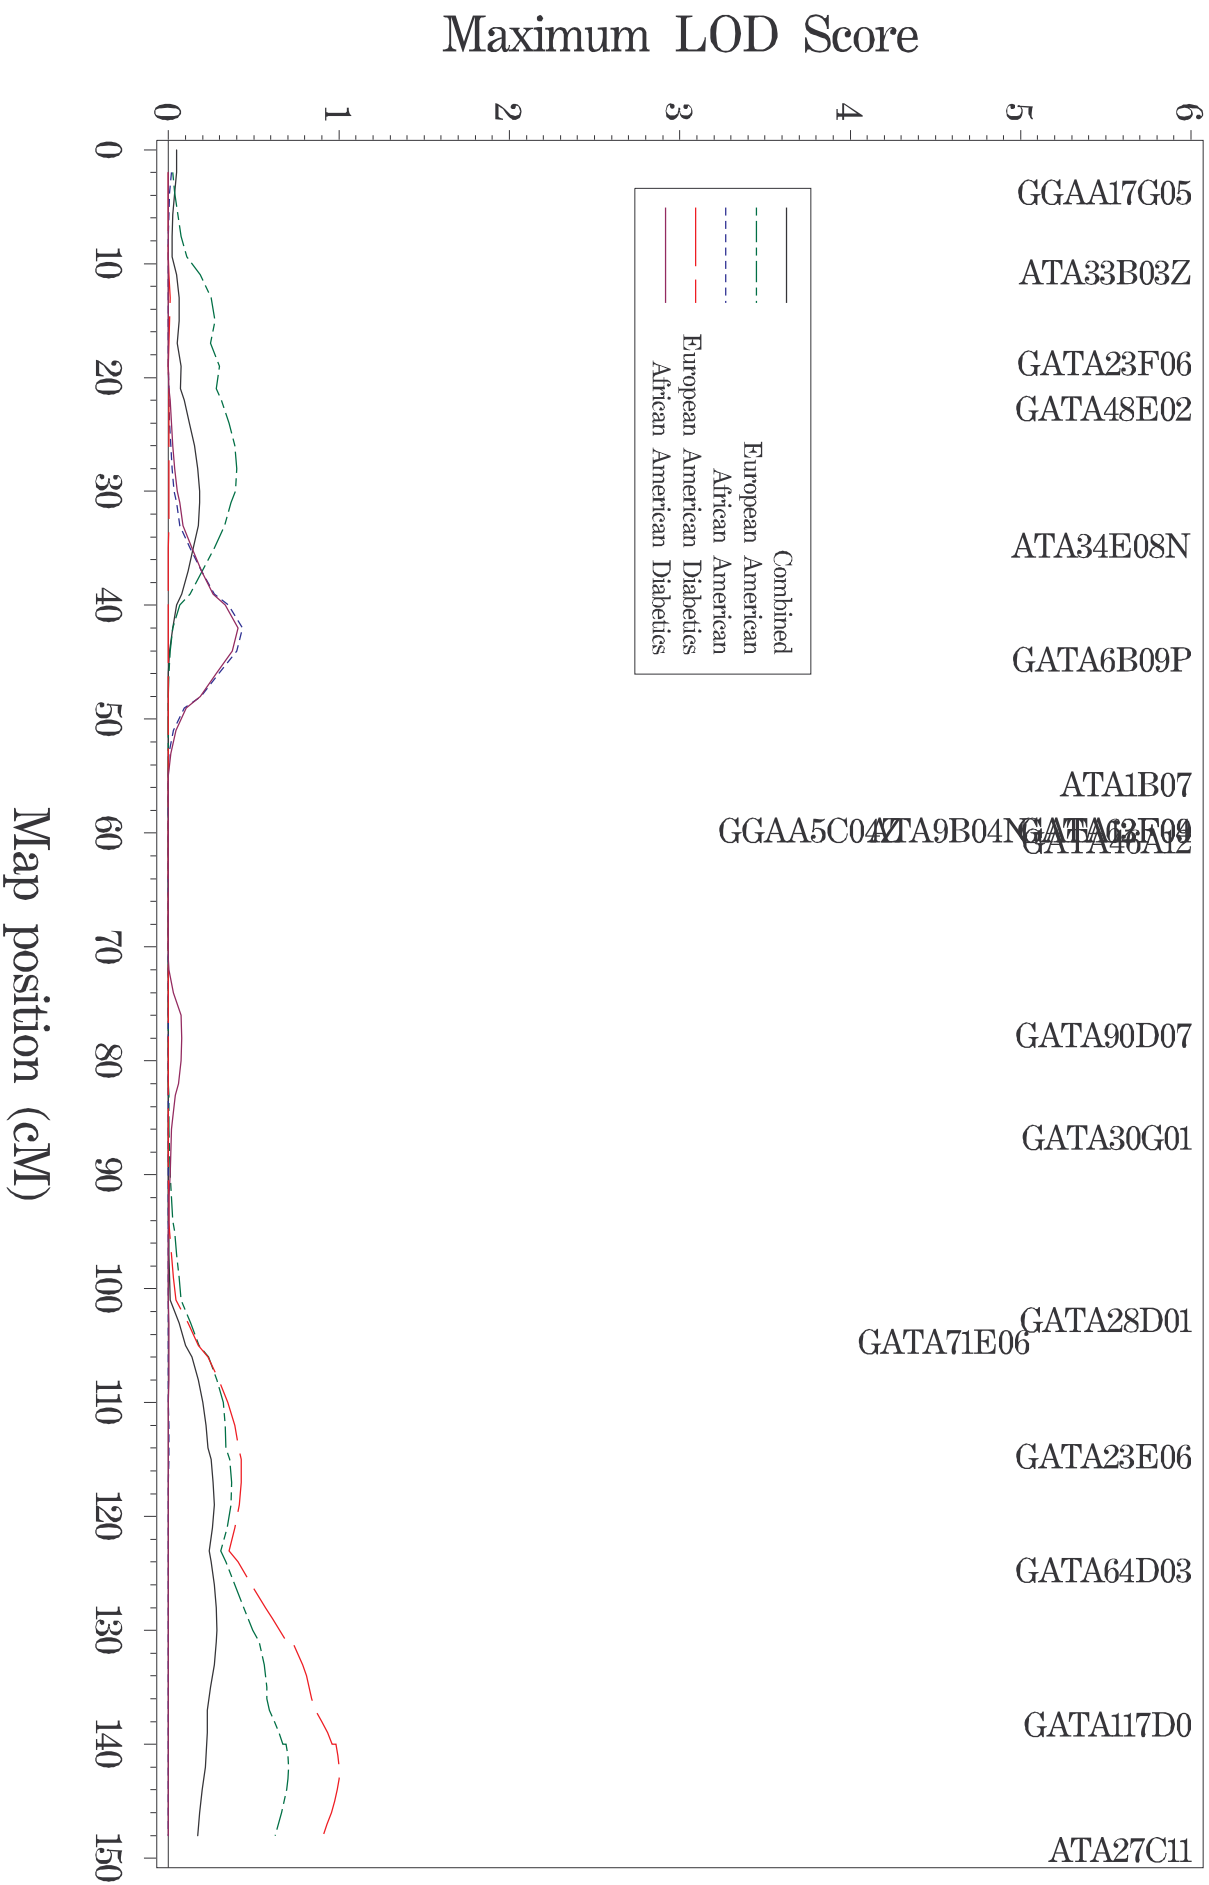

# QTL Linkage Analysis of Vascular Calcium Principle Components Chromosome 12

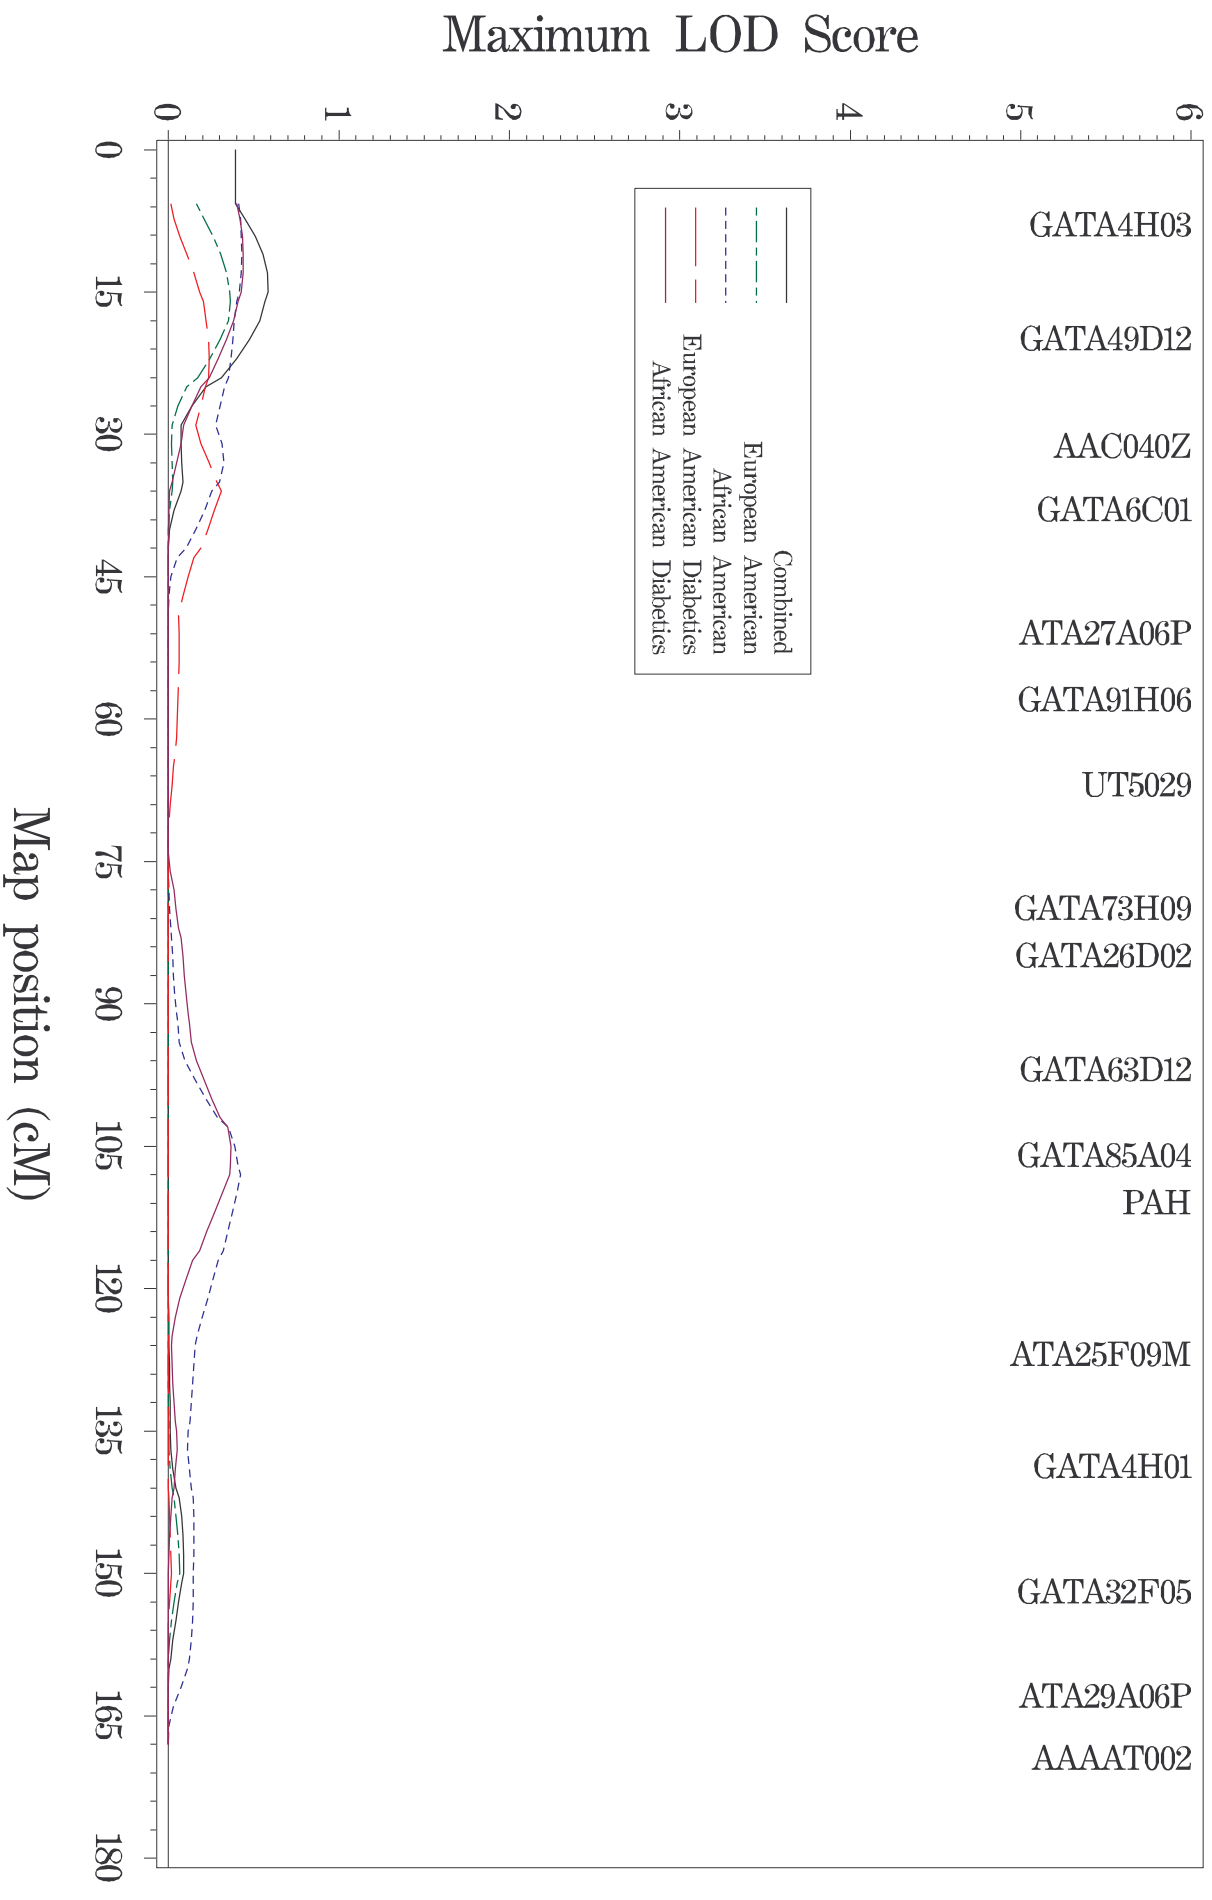

# QTL Linkage Analysis of Vascular Calcium Principle Components Chromosome 13

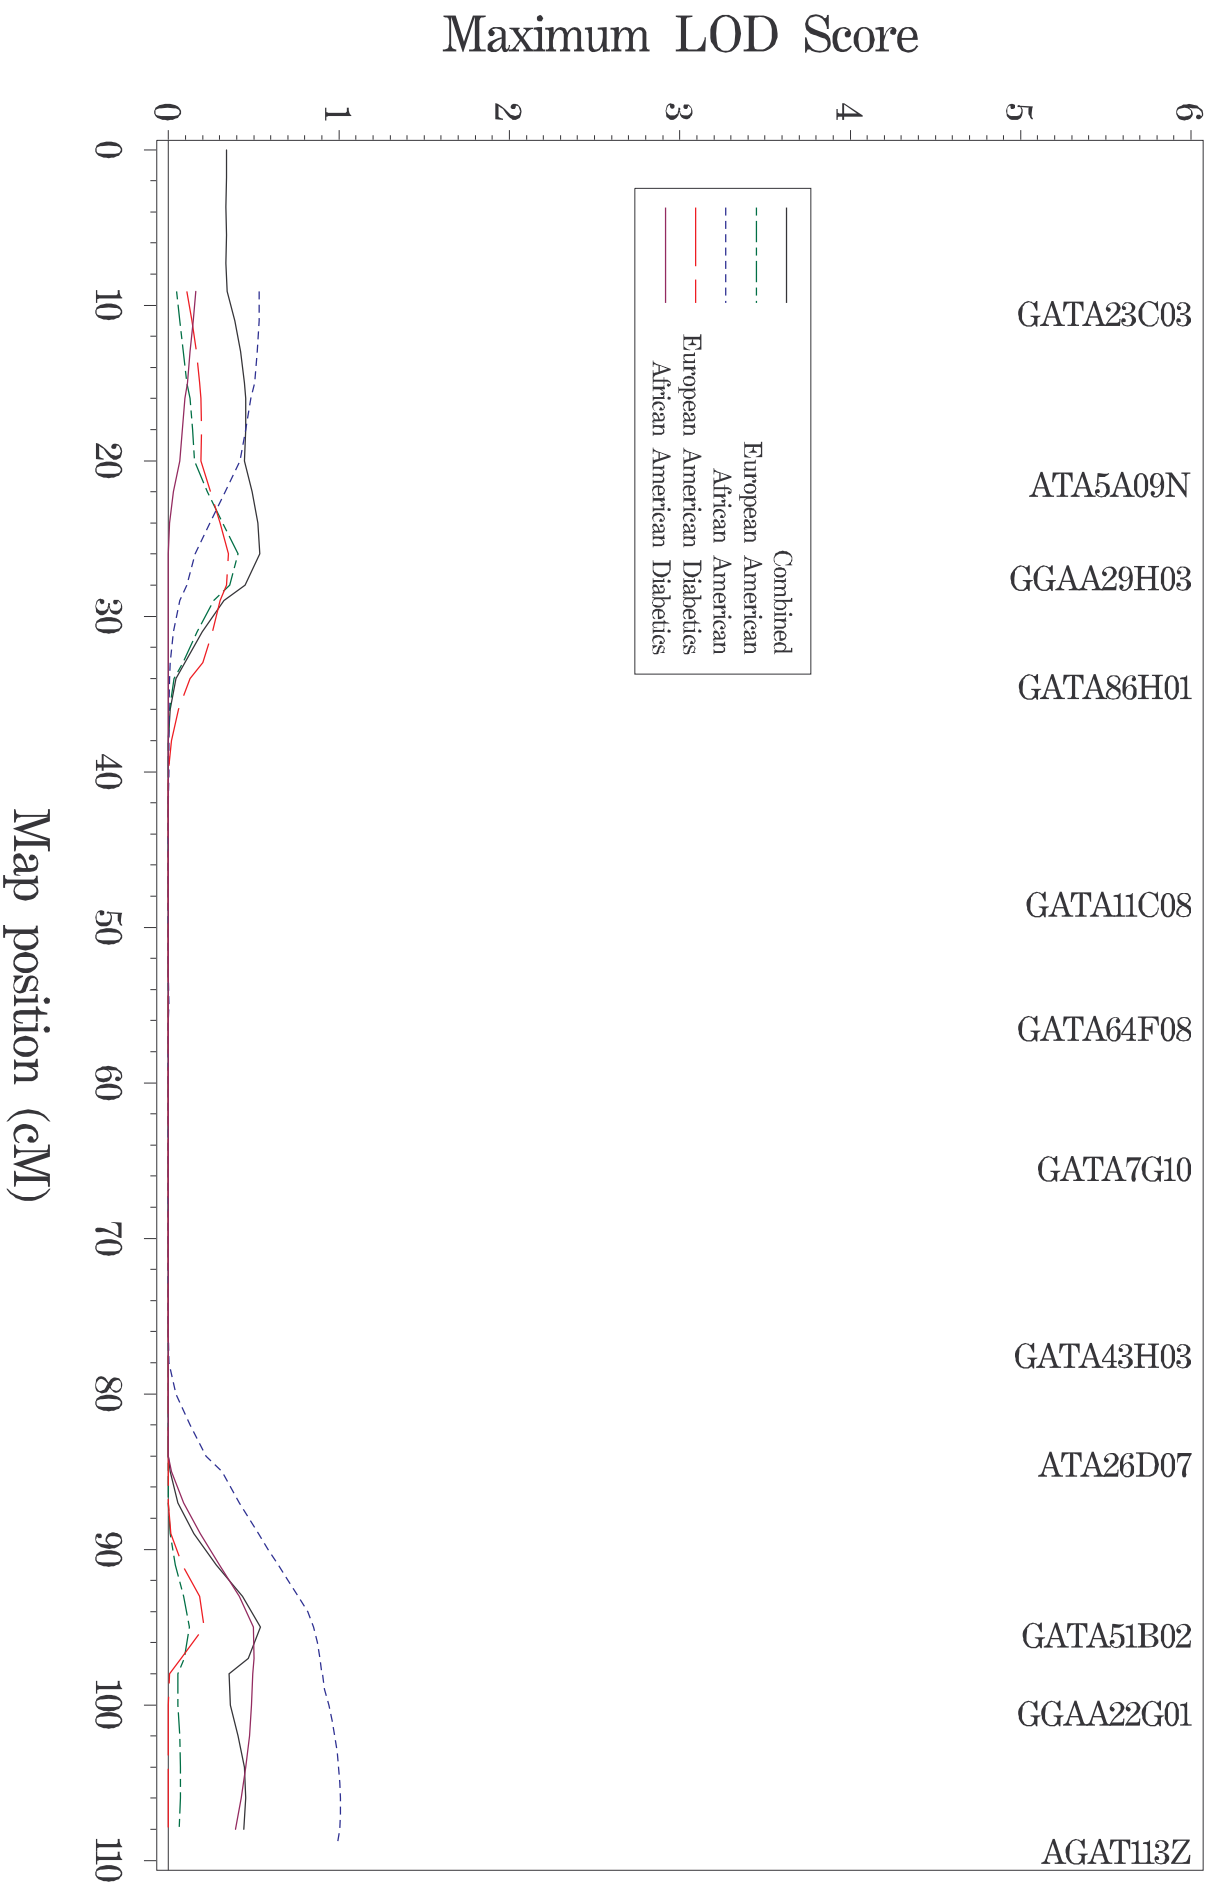

# QTL Linkage Analysis of Vascular Calcium Principle Components Chromosome 14

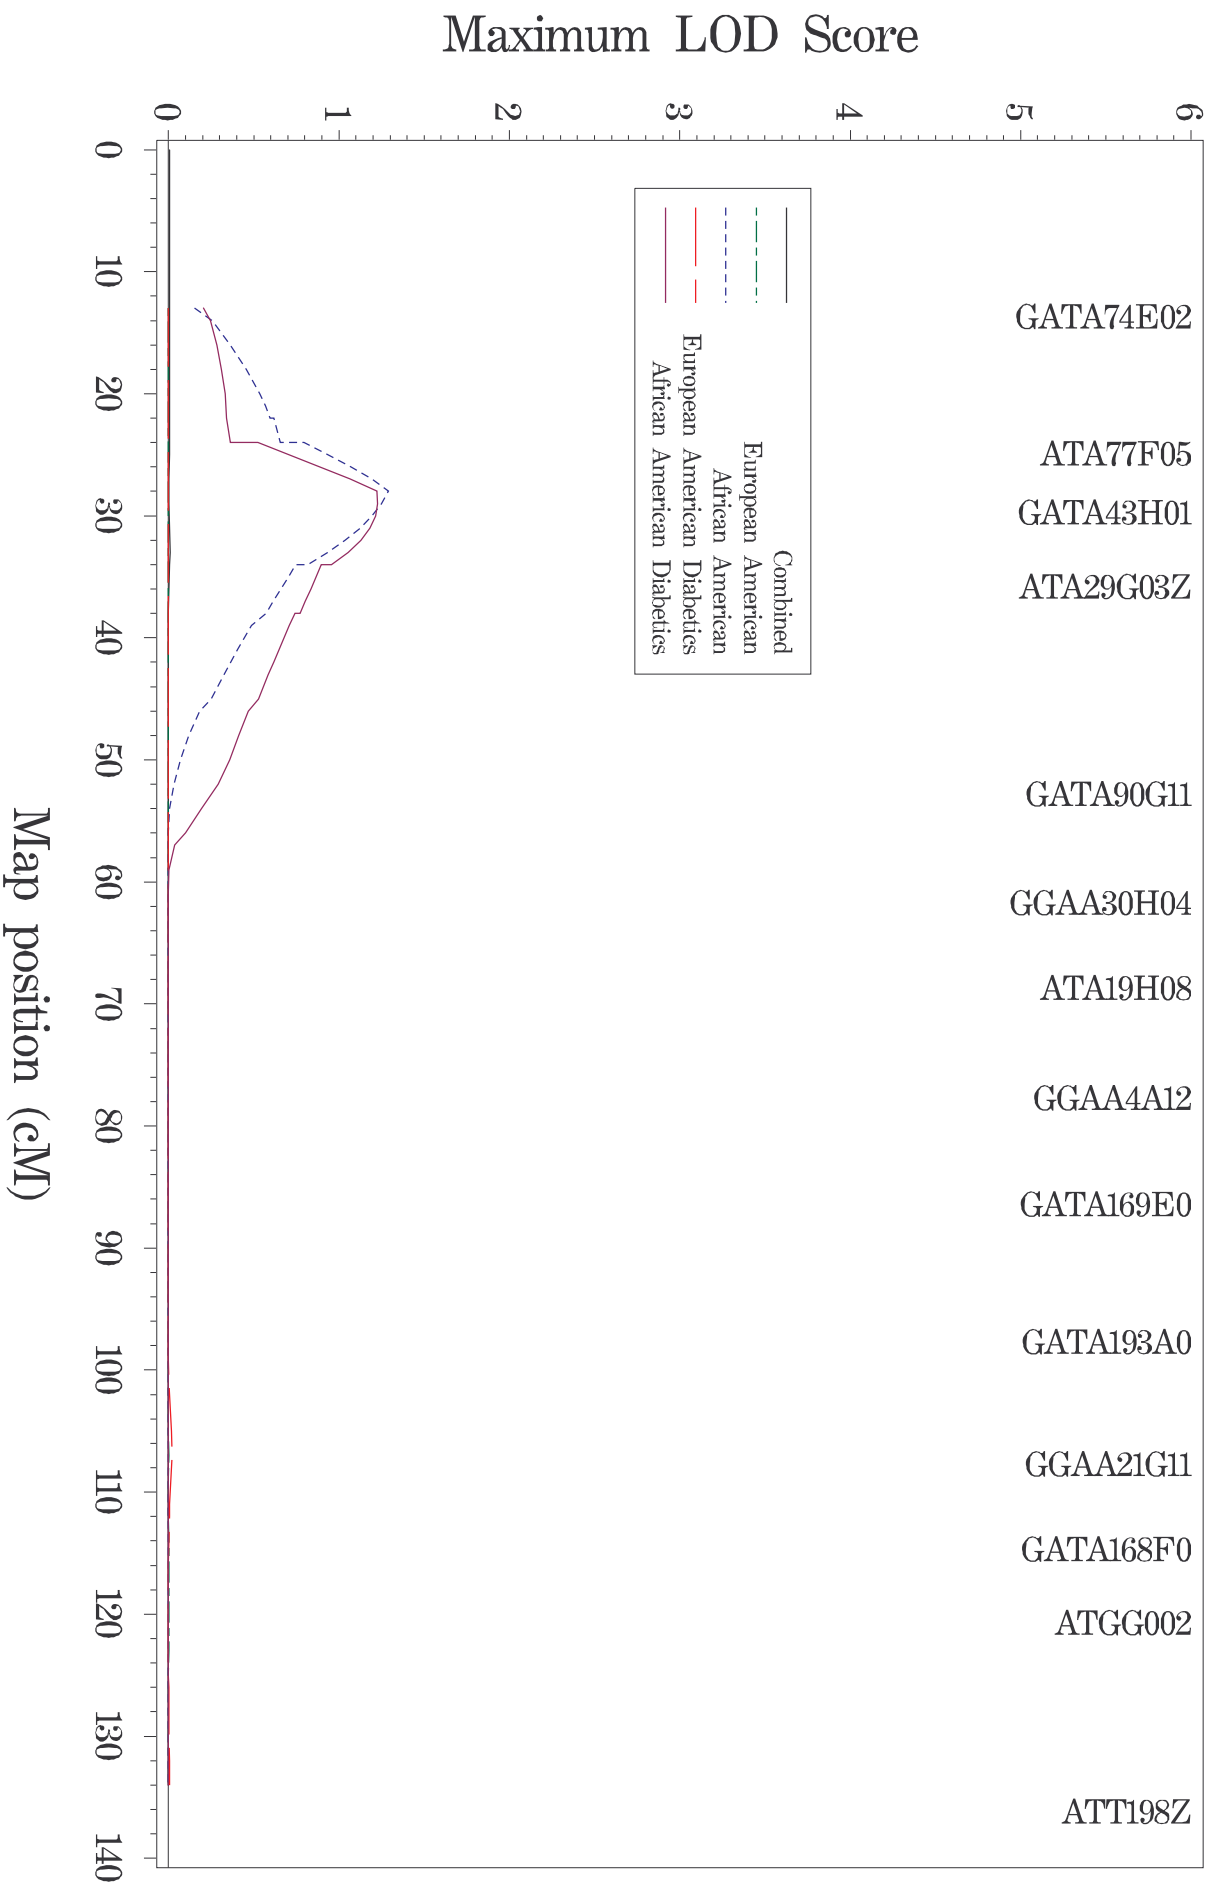

# QTL Linkage Analysis of Vascular Calcium Principle Components Chromosome 15

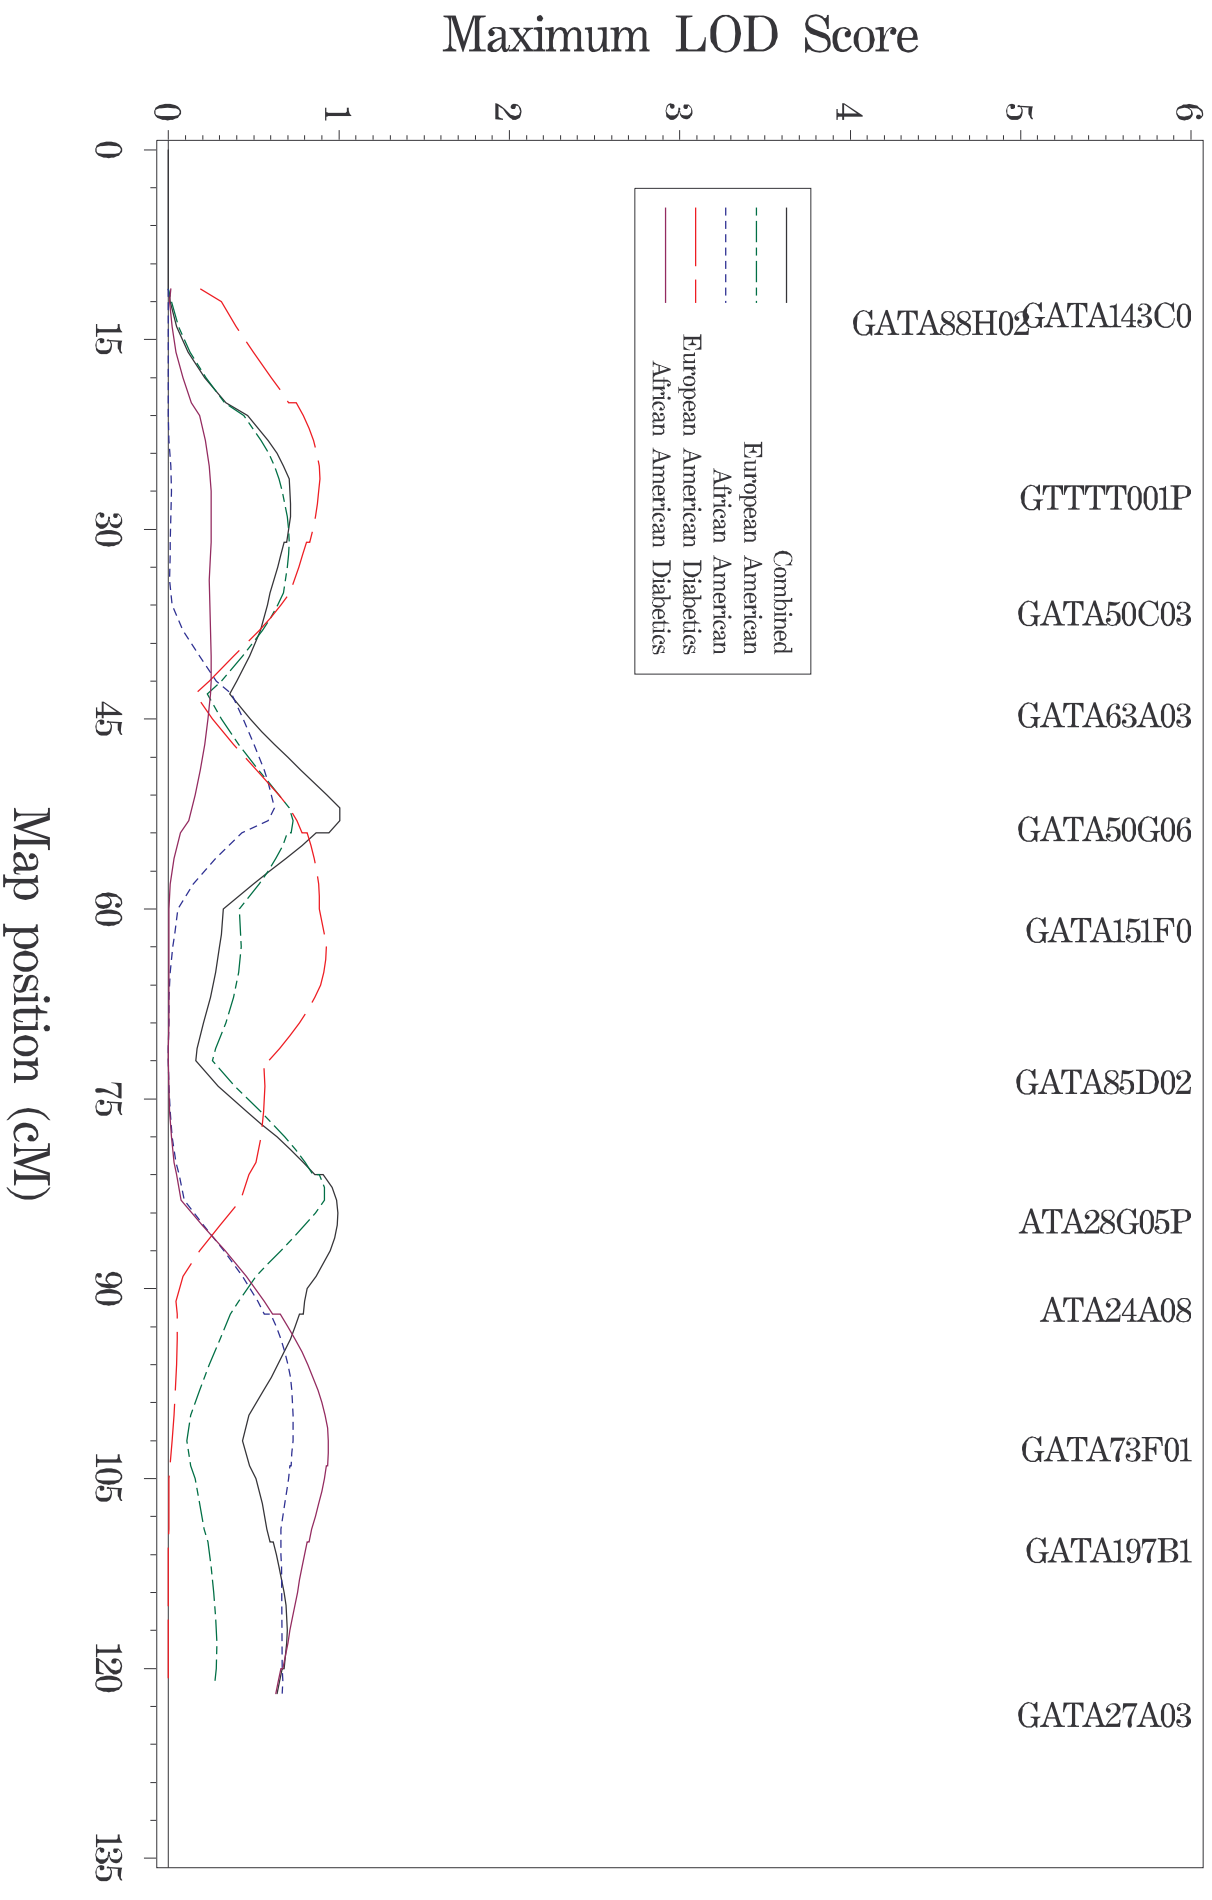

# QTL Linkage Analysis of Vascular Calcium Principle Components Chromosome 16

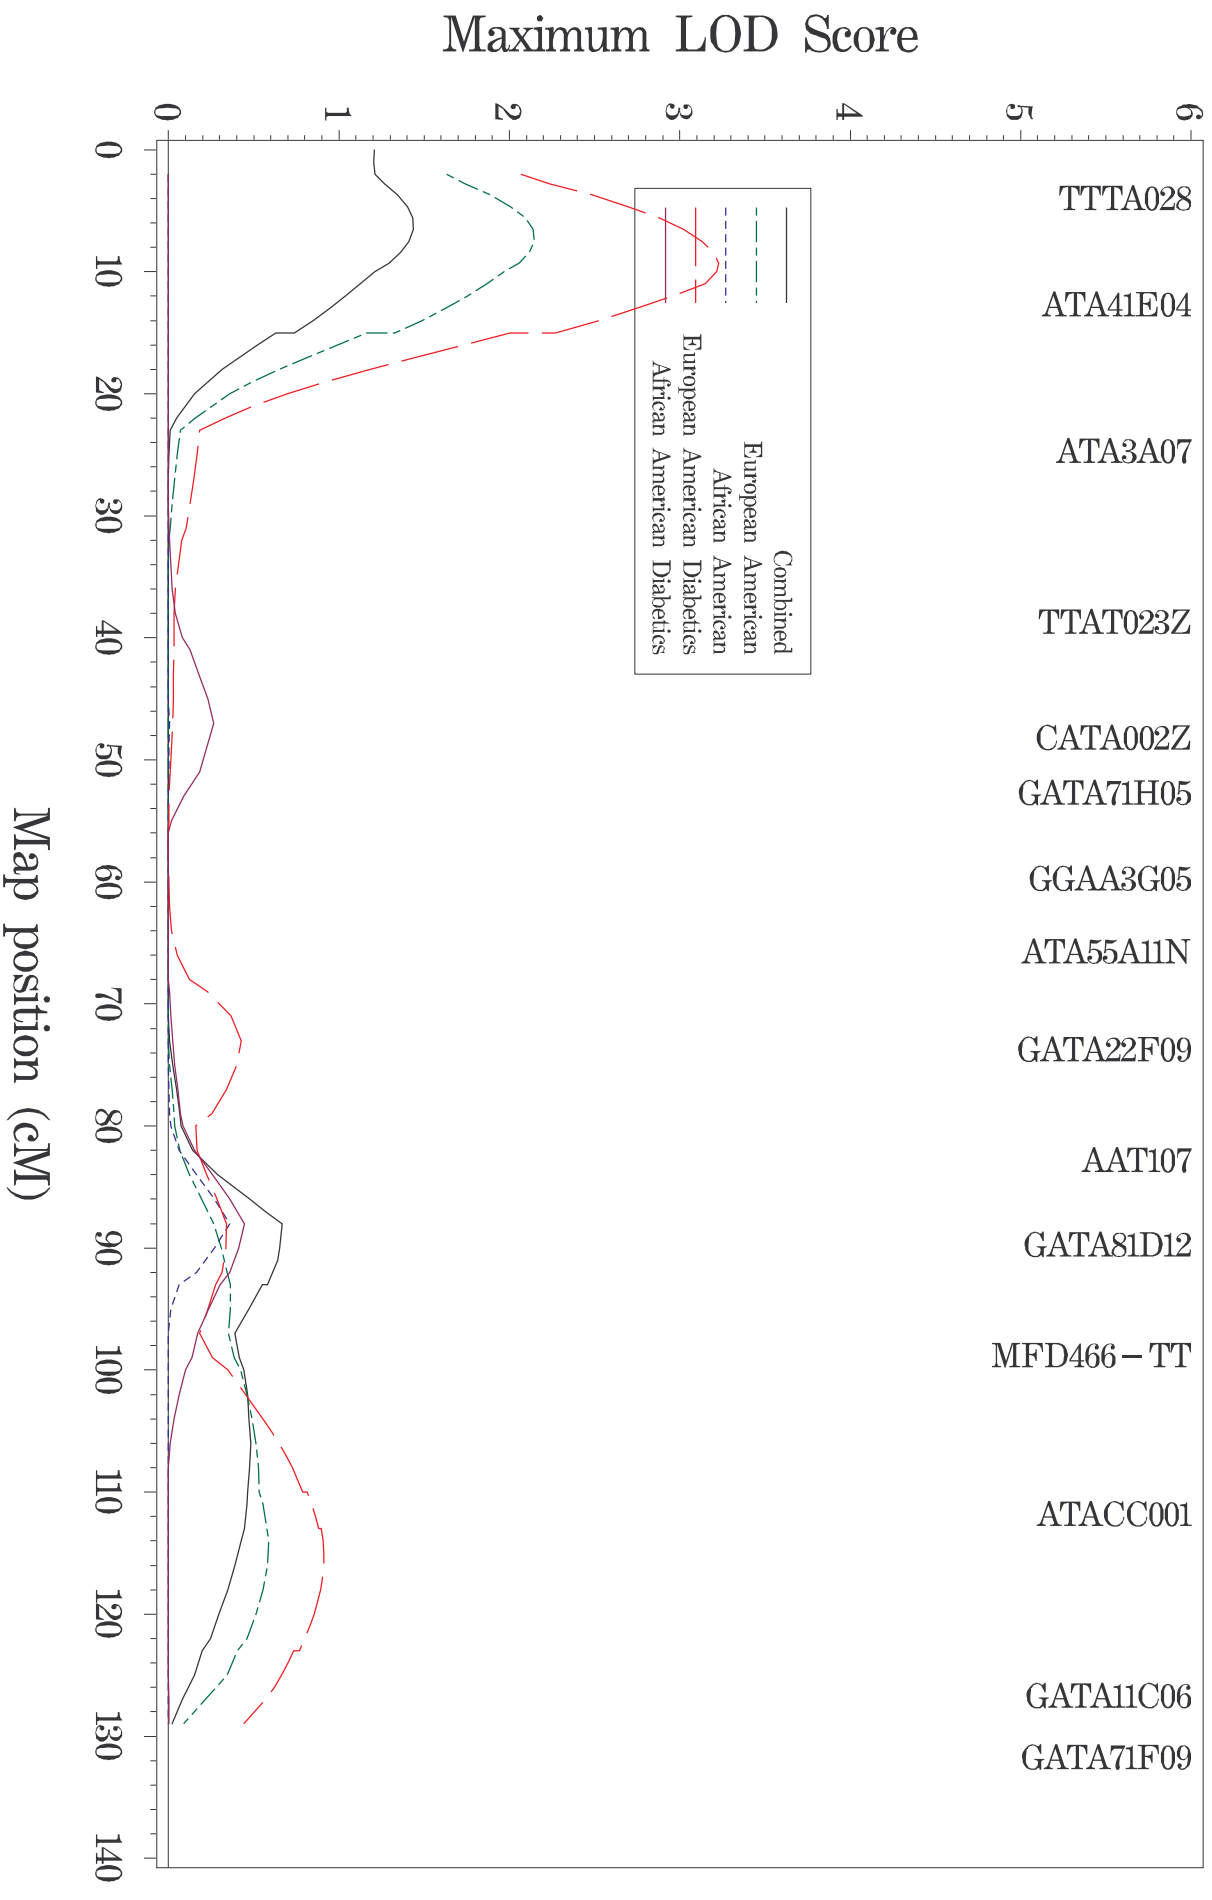



# QTL Linkage Analysis of Vascular Calcium Principle Components Chromosome 17

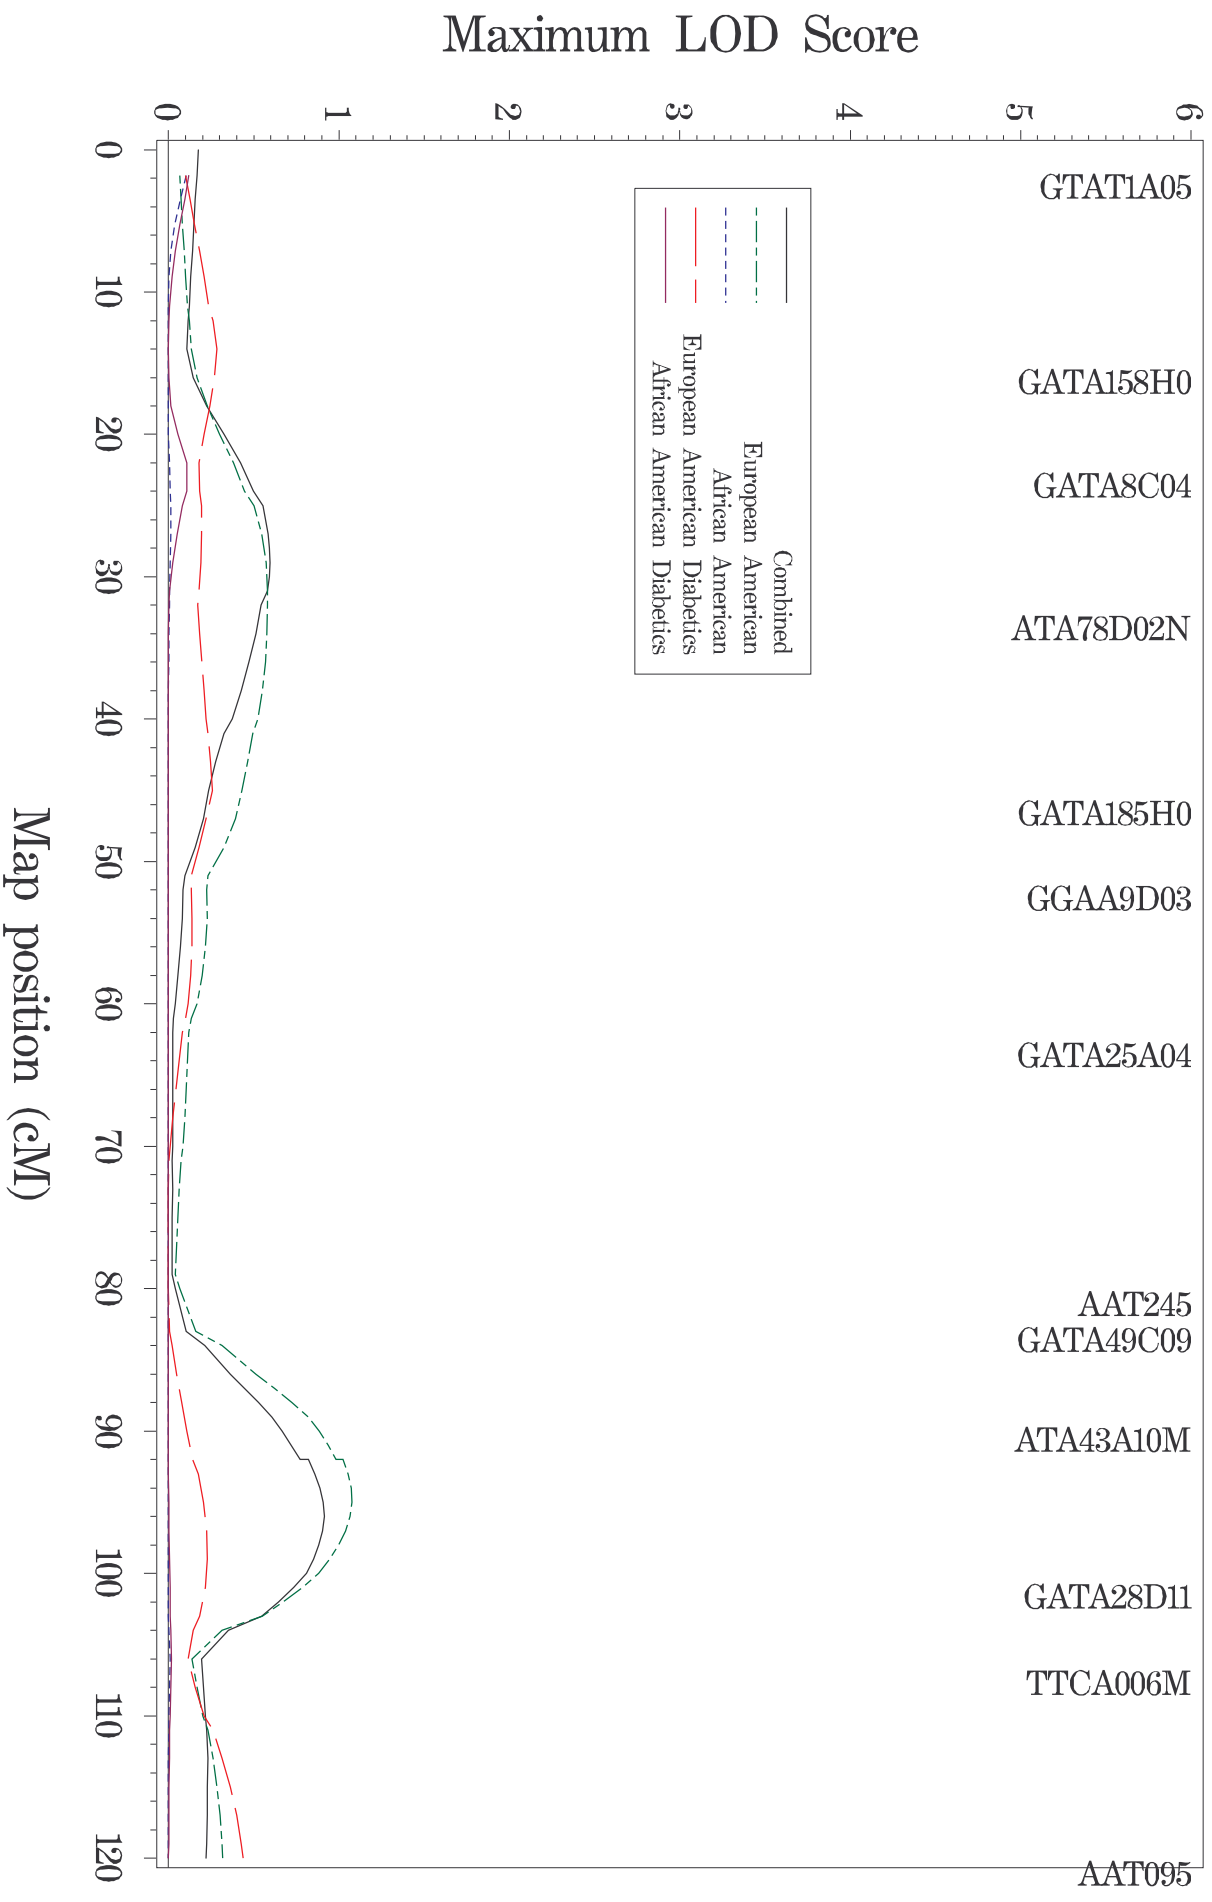

# QTL Linkage Analysis of Vascular Calcium Principle Components Chromosome 18

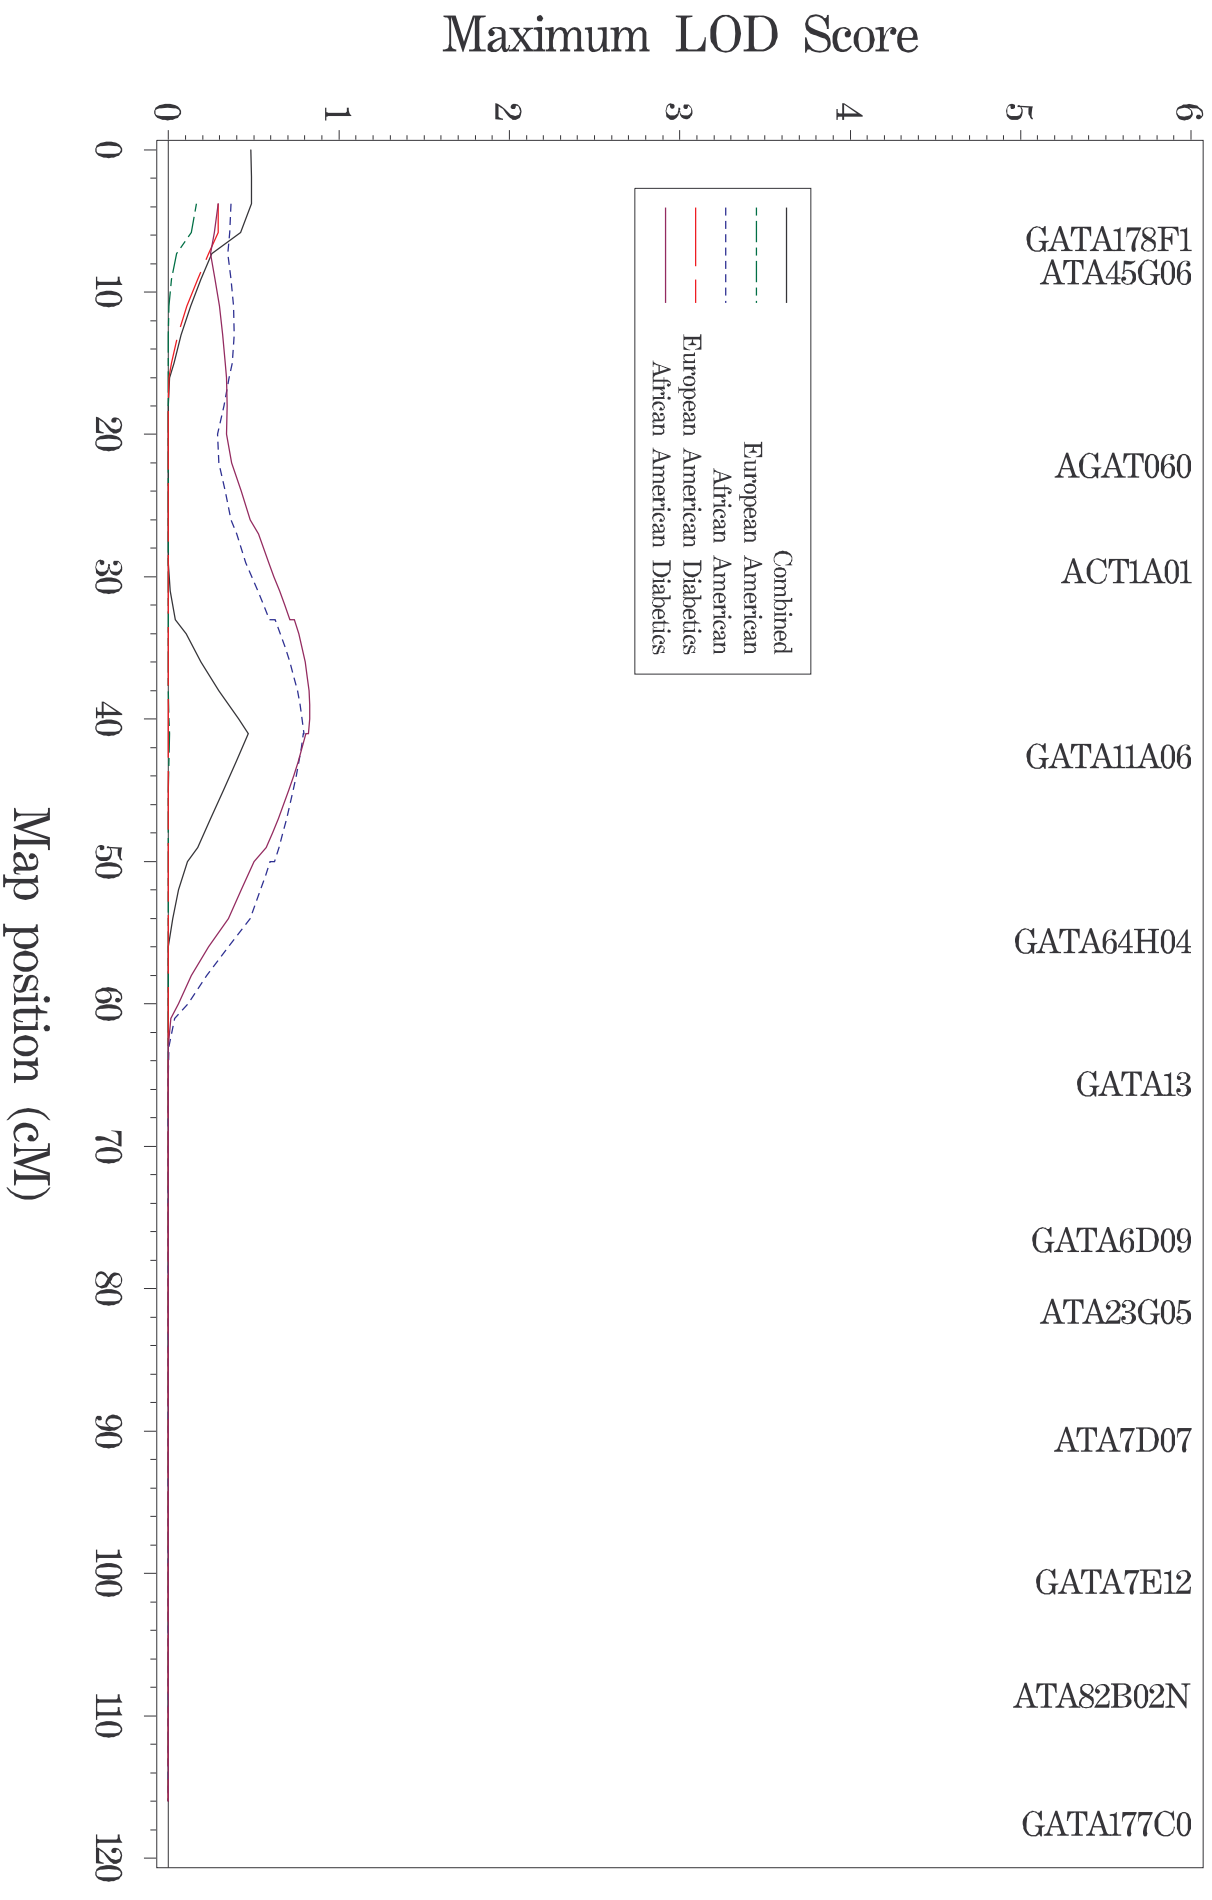

# QTL Linkage Analysis of Vascular Calcium Principle Components Chromosome 19

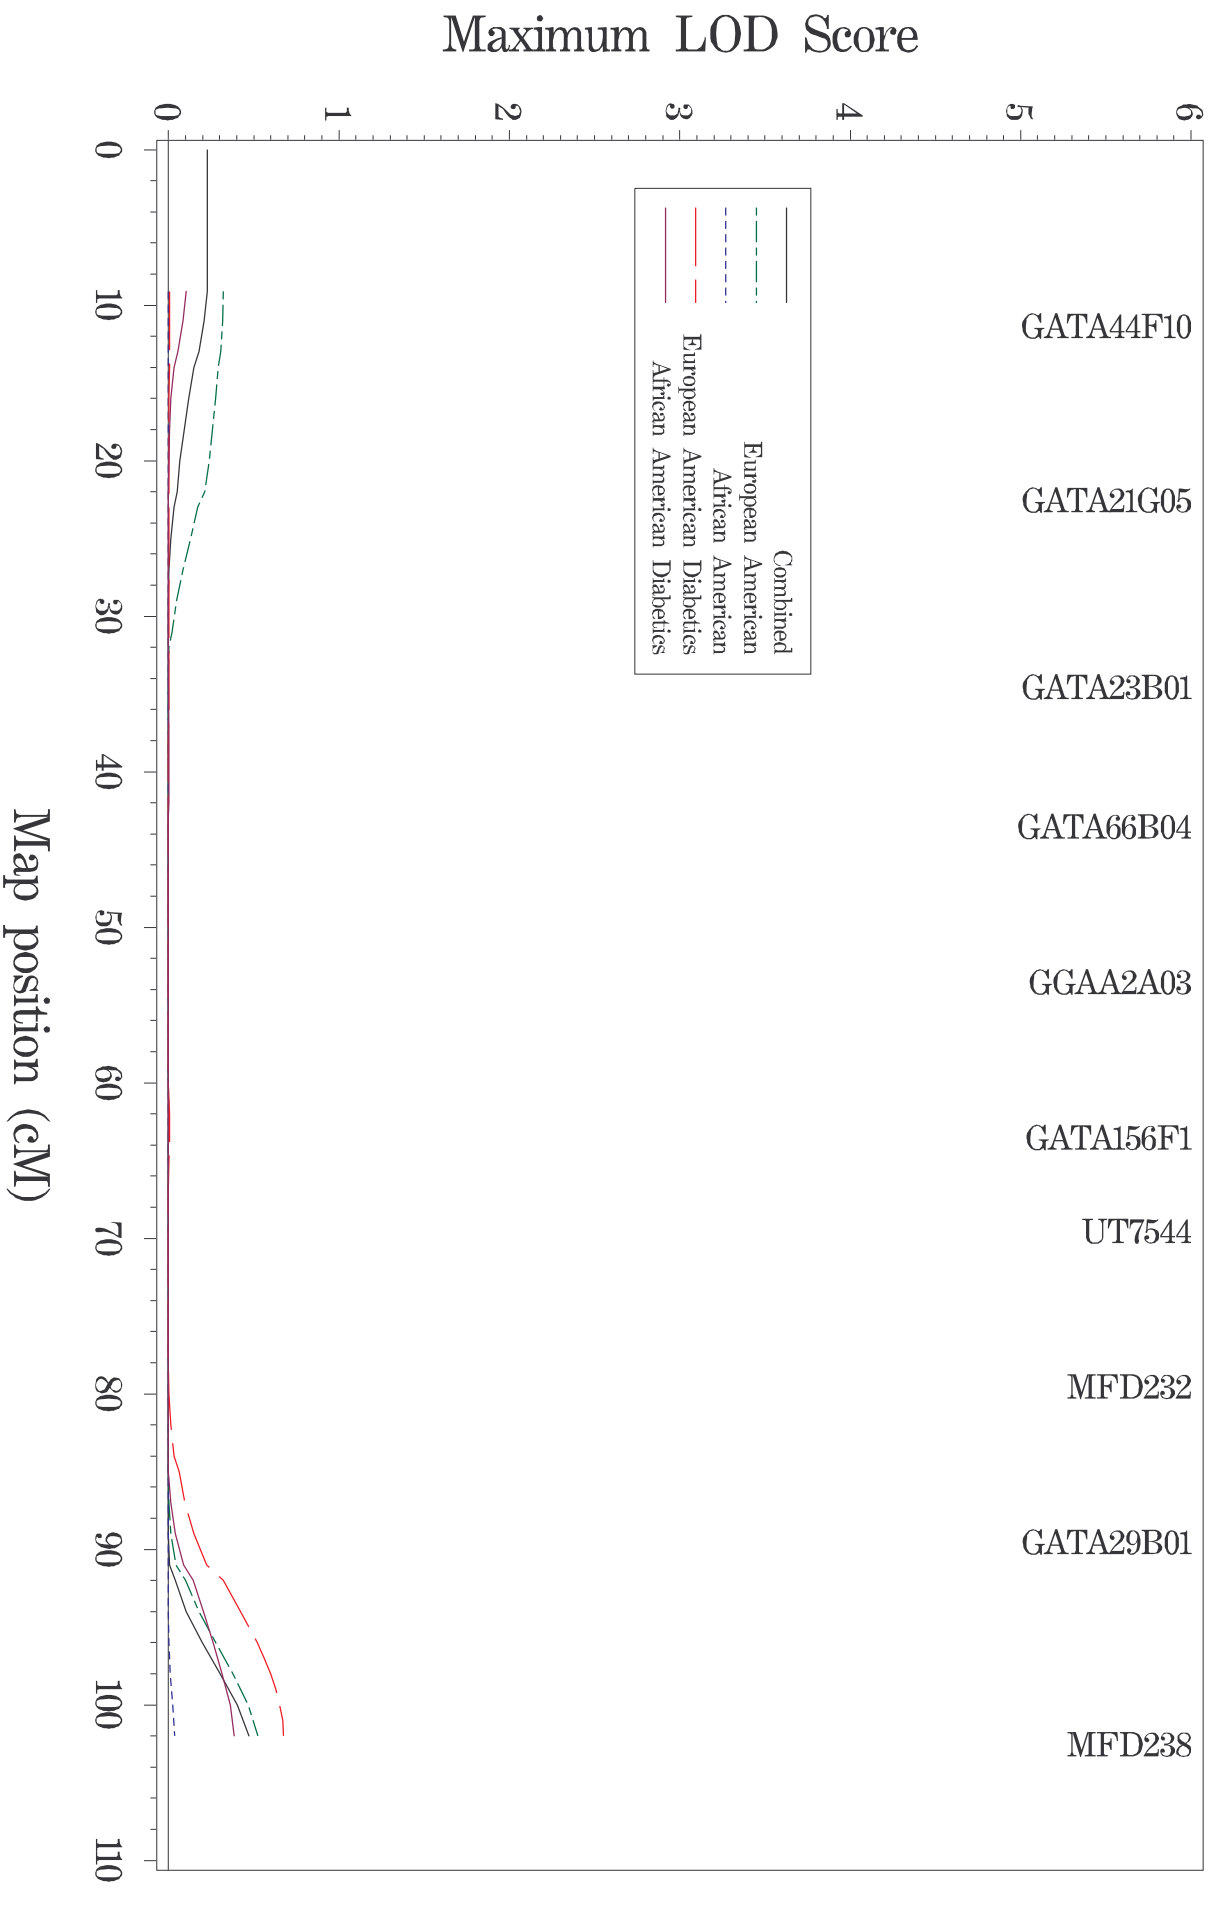

# QTL Linkage Analysis of Vascular Calcium Principle Components Chromosome 20

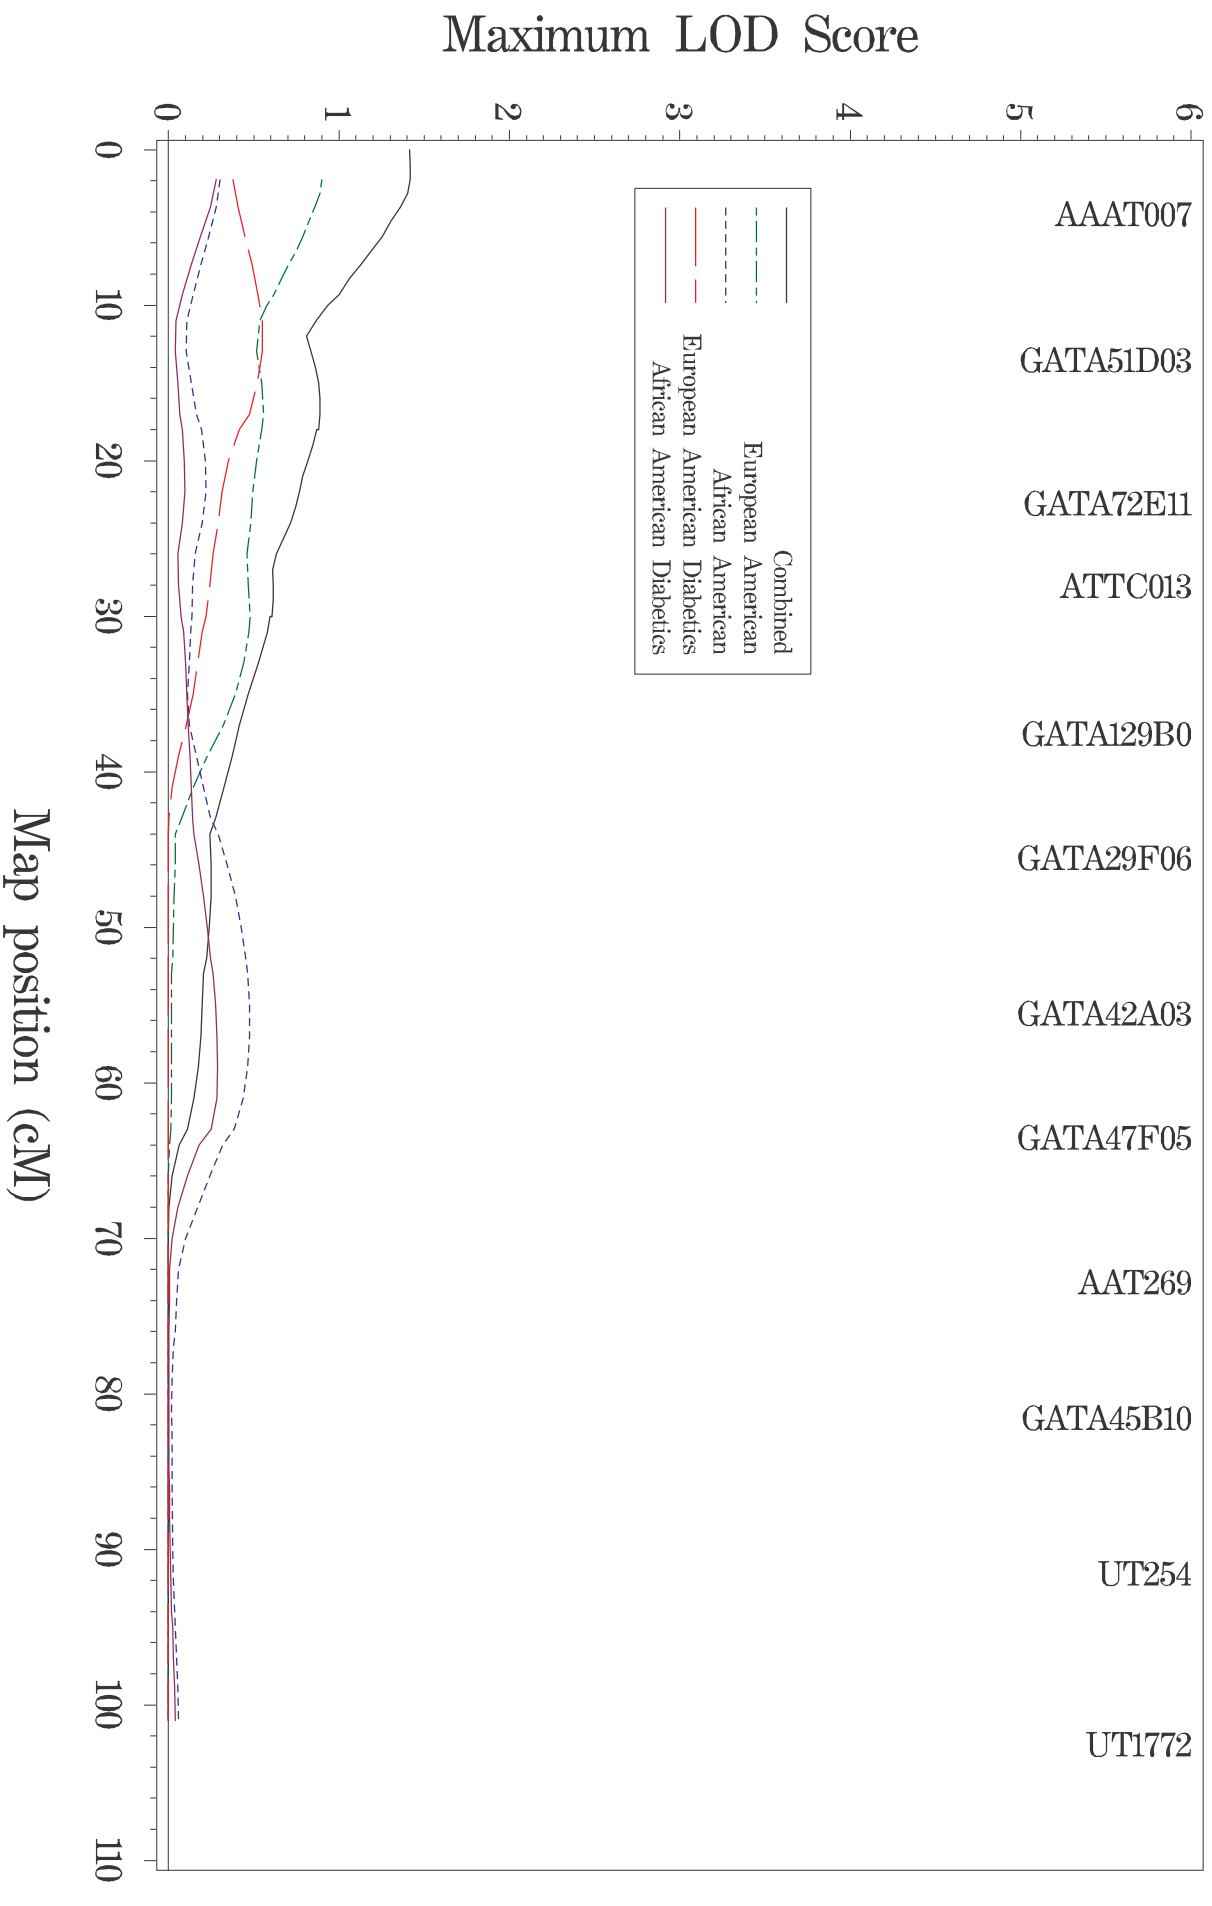

# QTL Linkage Analysis of Vascular Calcium Principle Components Chromosome 21

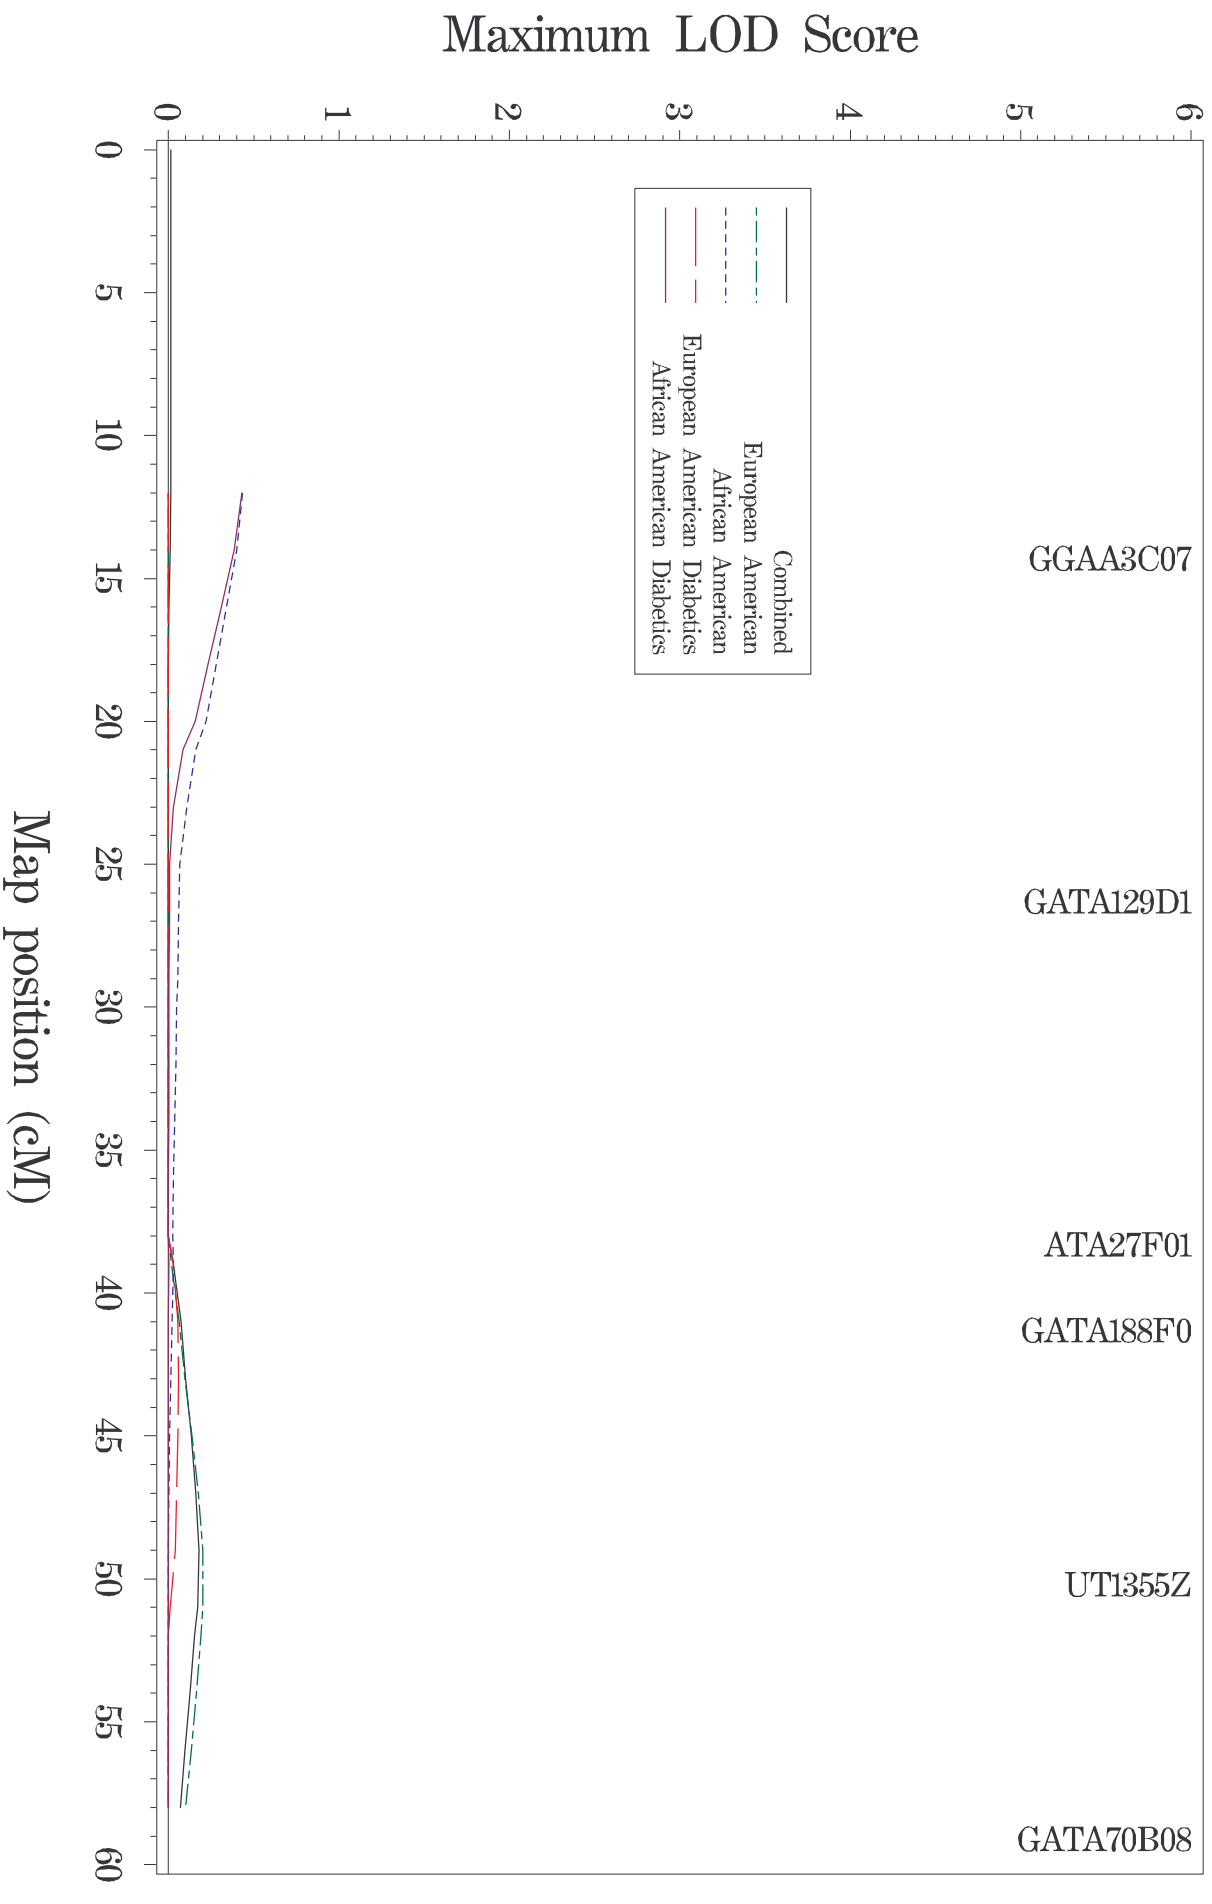

# QTL Linkage Analysis of Vascular Calcium Principle Components Chromosome 22

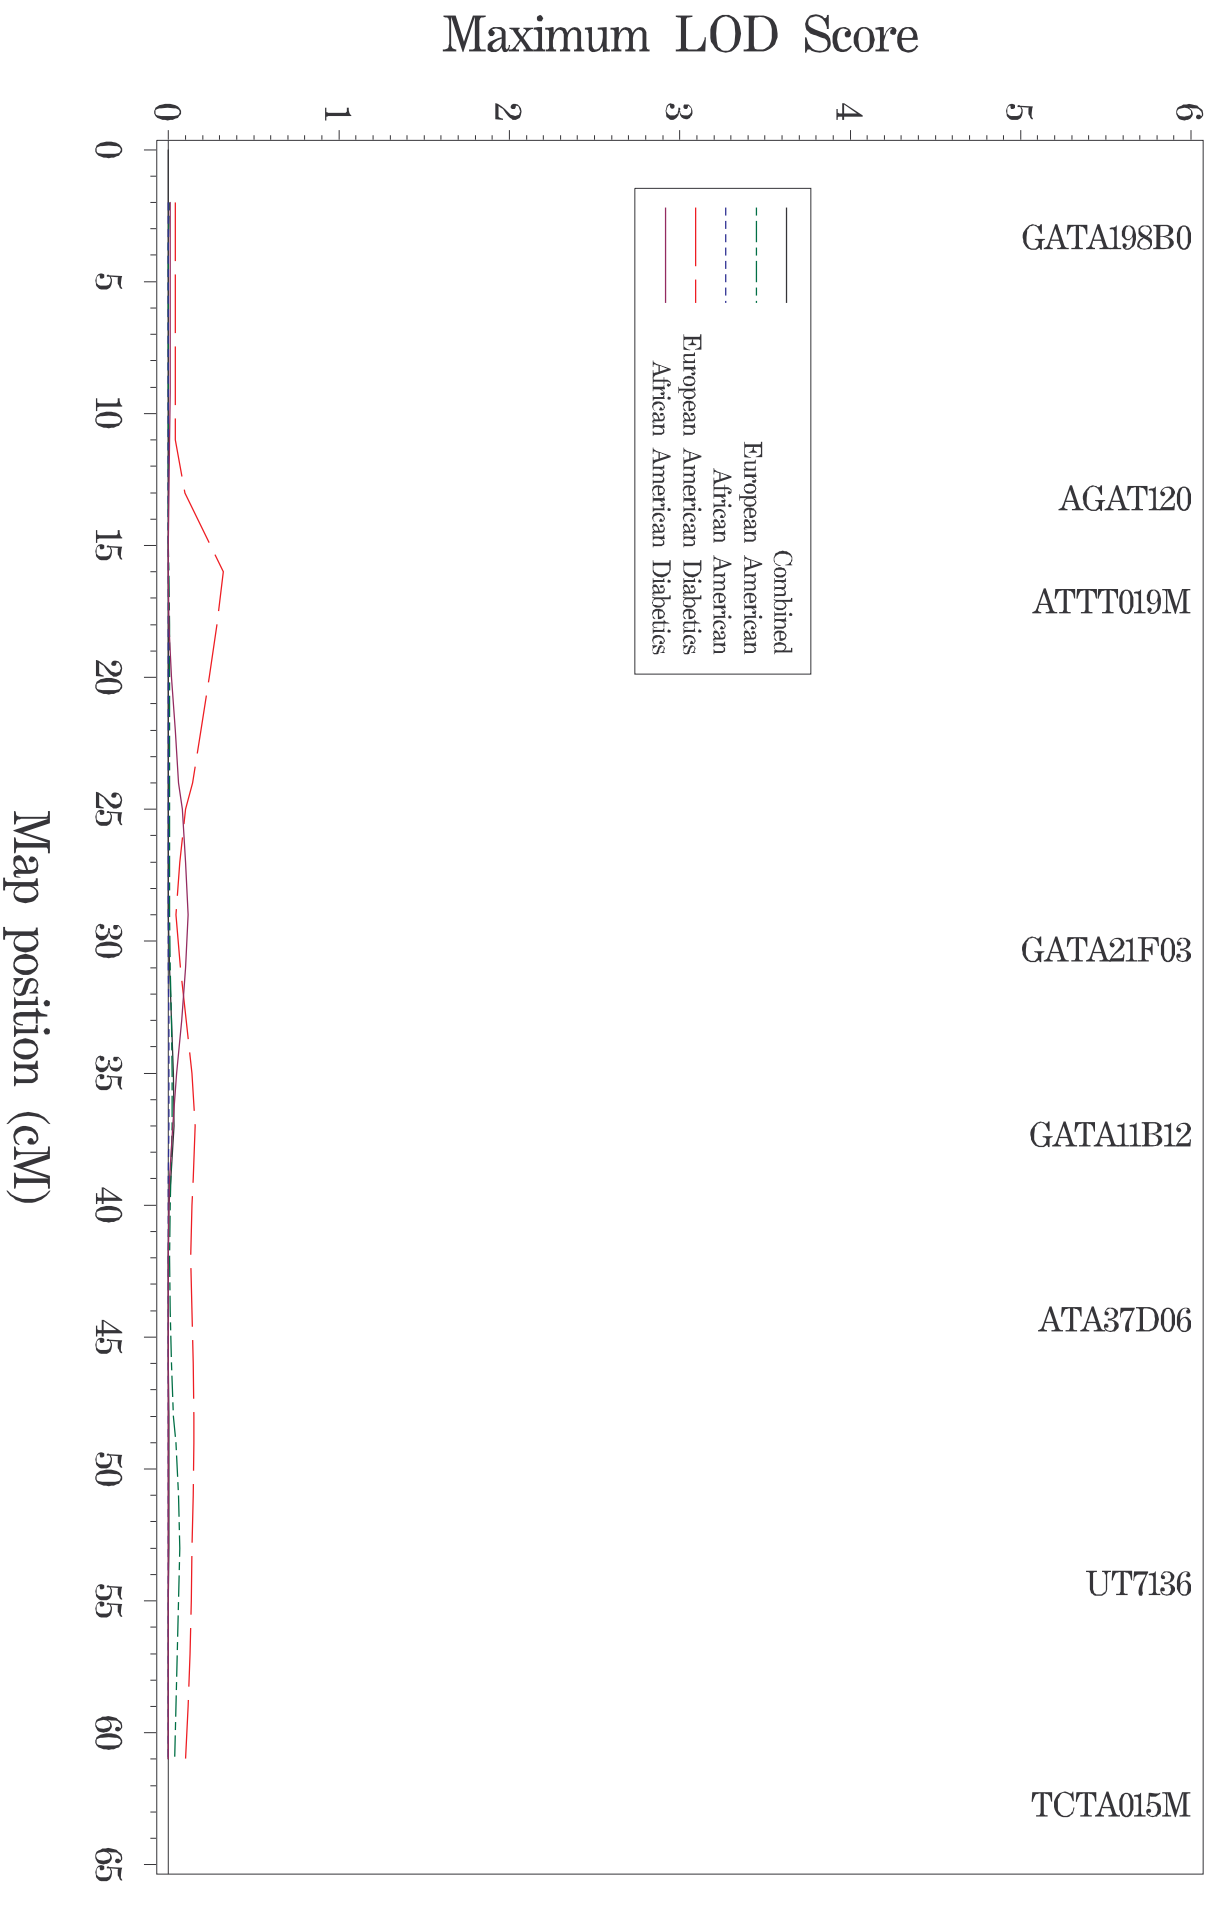

Supplement: NIHMS788218-supplement-Supp_Fig_1d.pdf [file NIHMS788218-supplement-Supp_Fig_1d.pdf]
