# Supplementary material
Source: PubMed Central journal article supplement (PMC4890966)

# QTL Linkage Analysis of IMT

## Chromosome 1

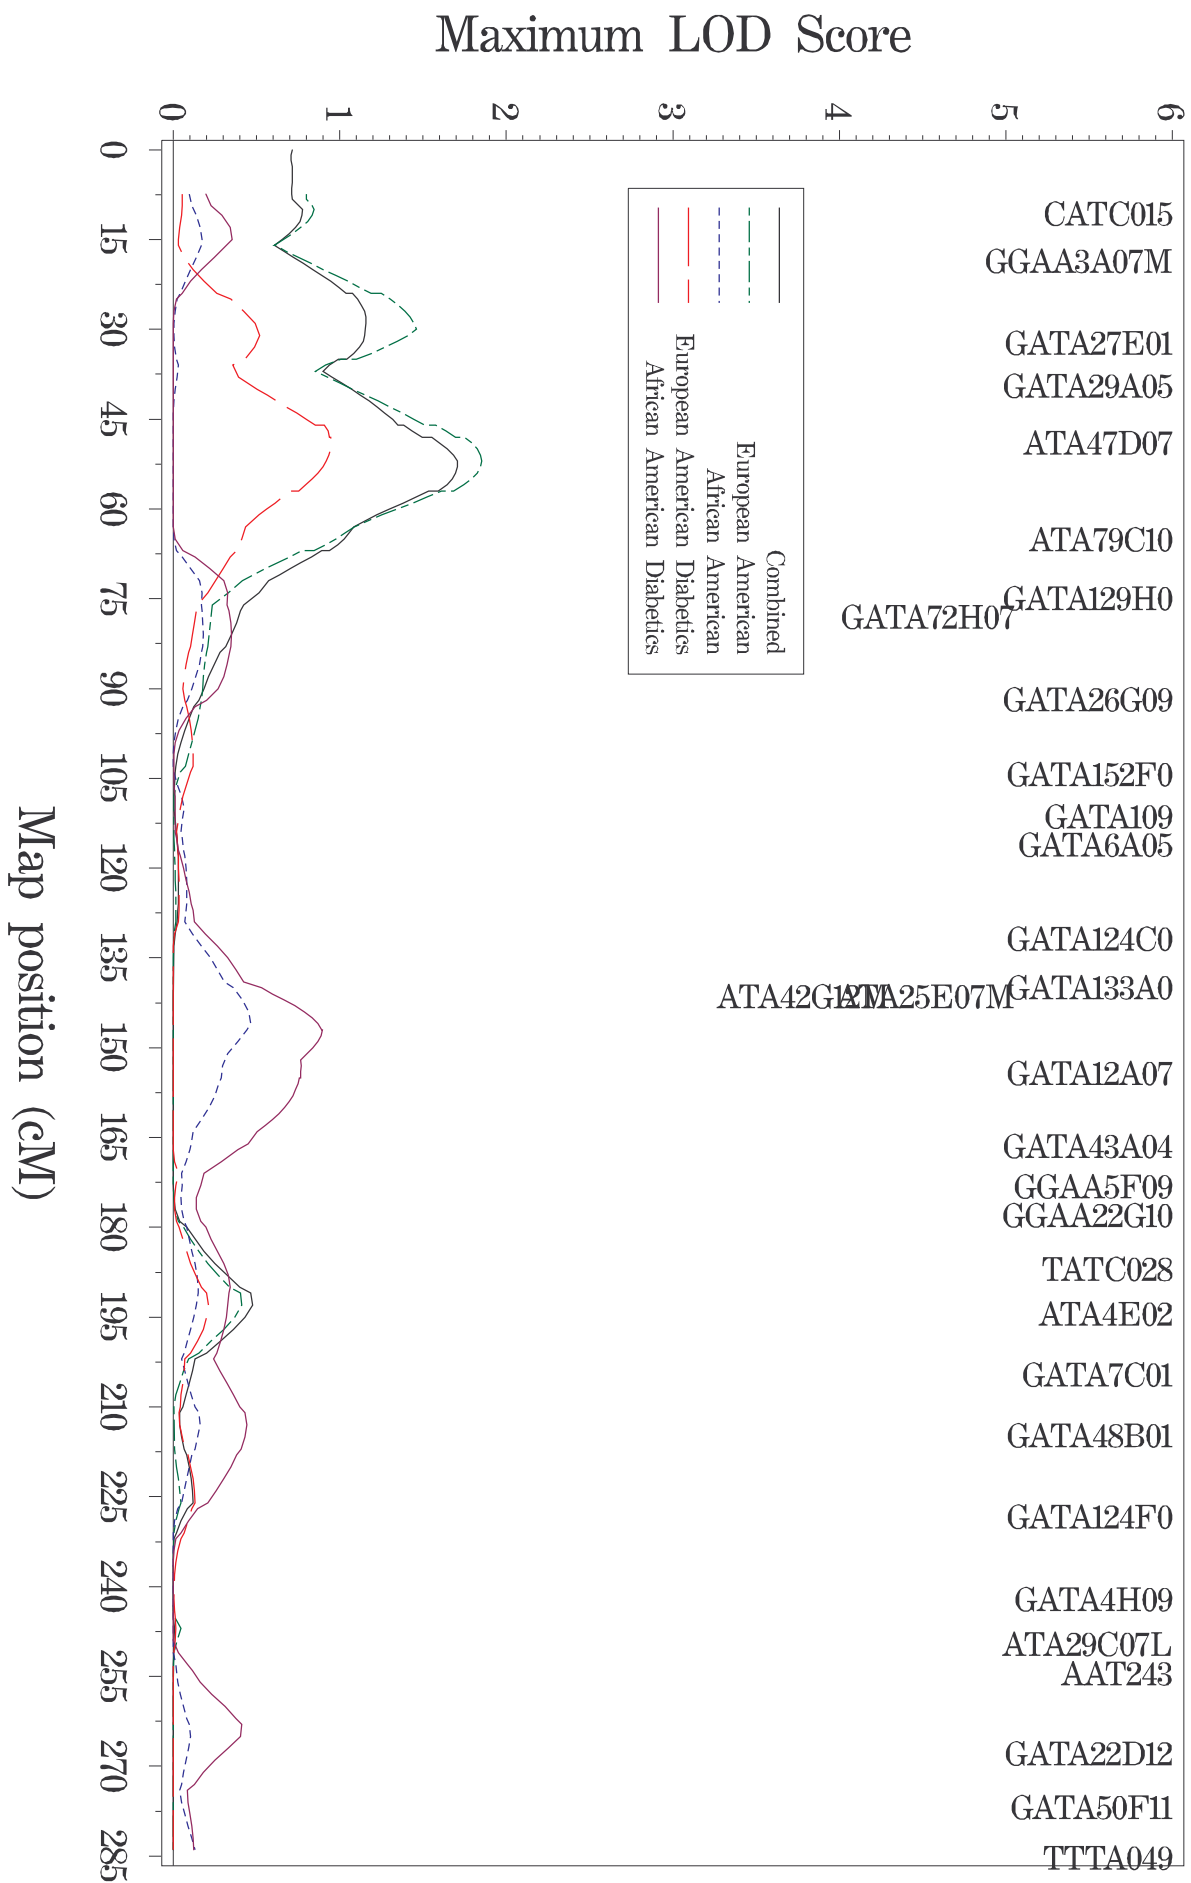

# QTL Linkage Analysis of IMT Chromosome 2

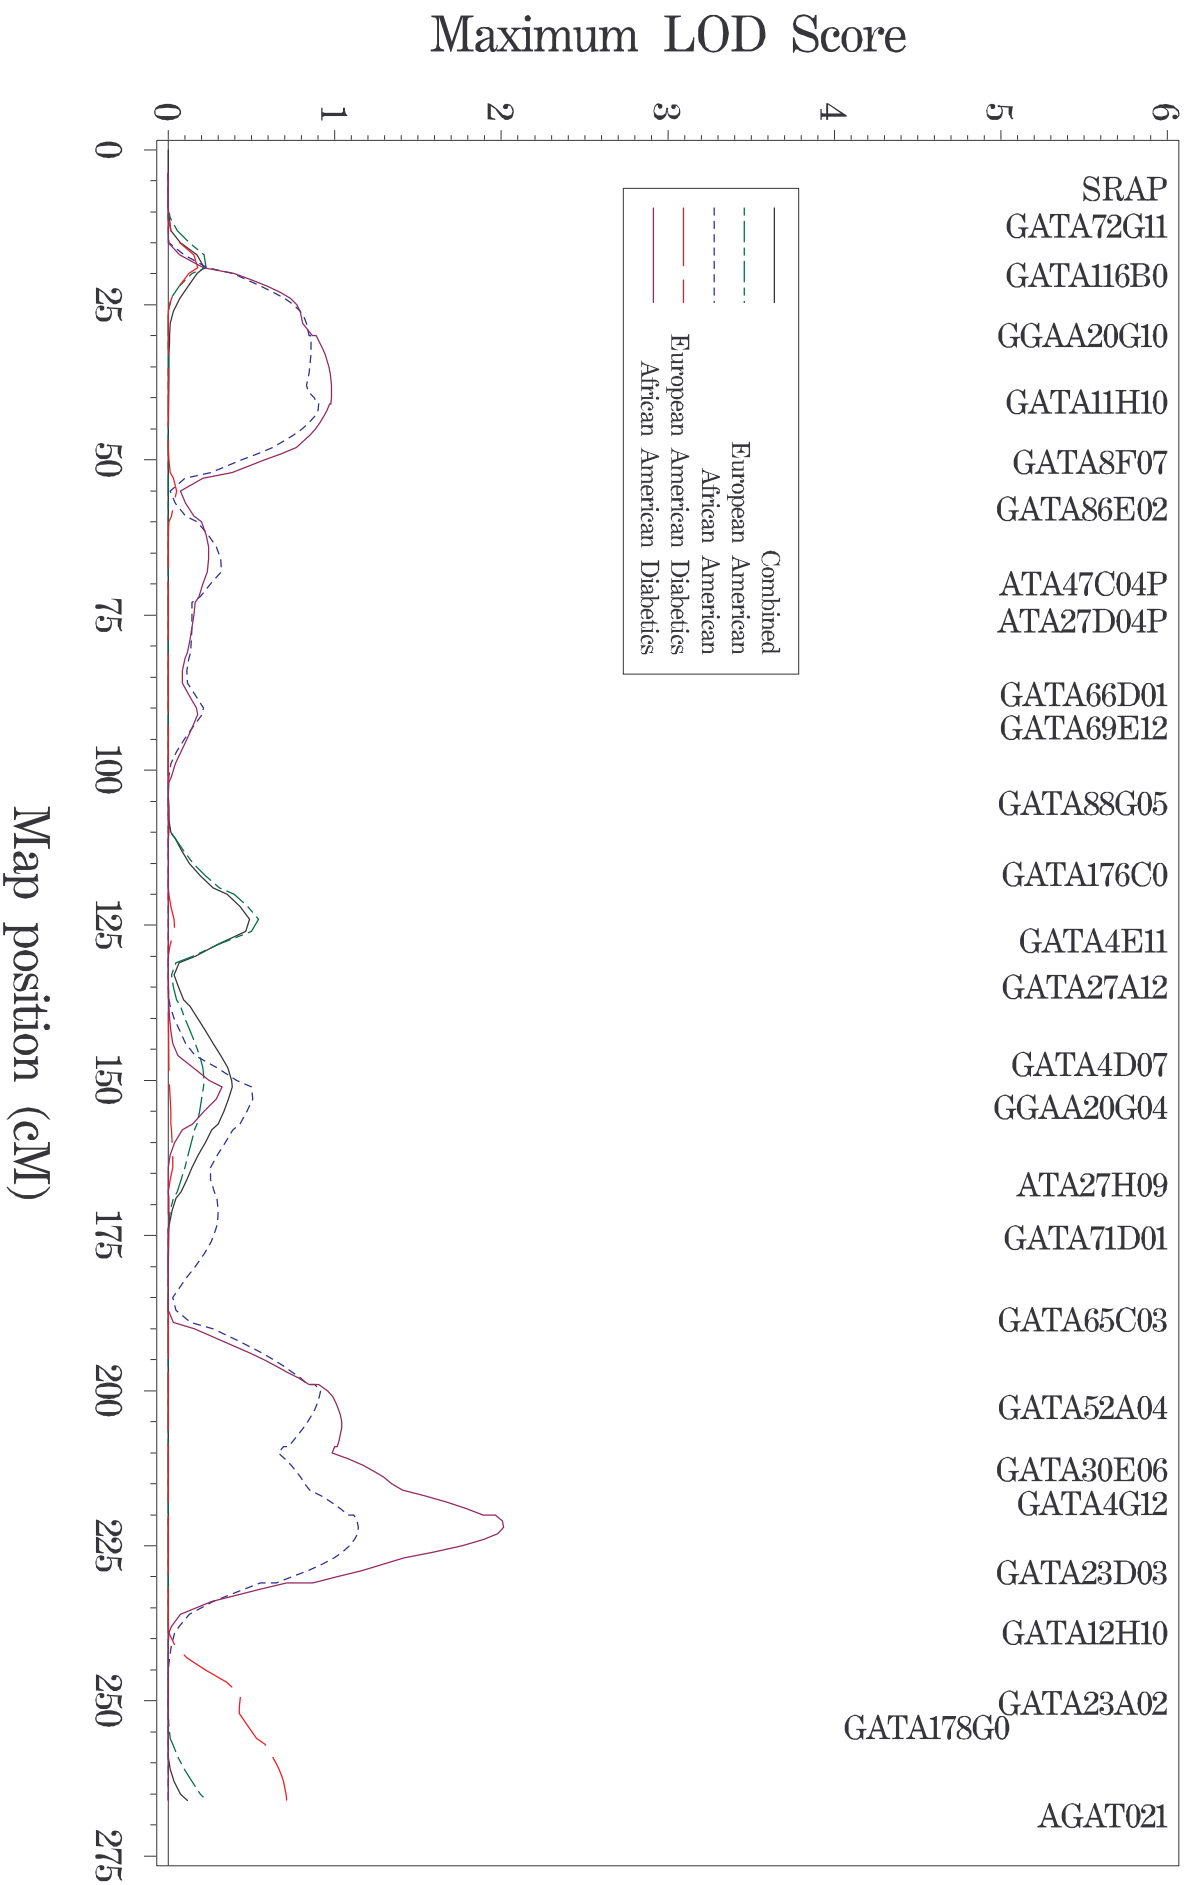

# QTL Linkage Analysis of IMT Chromosome 3

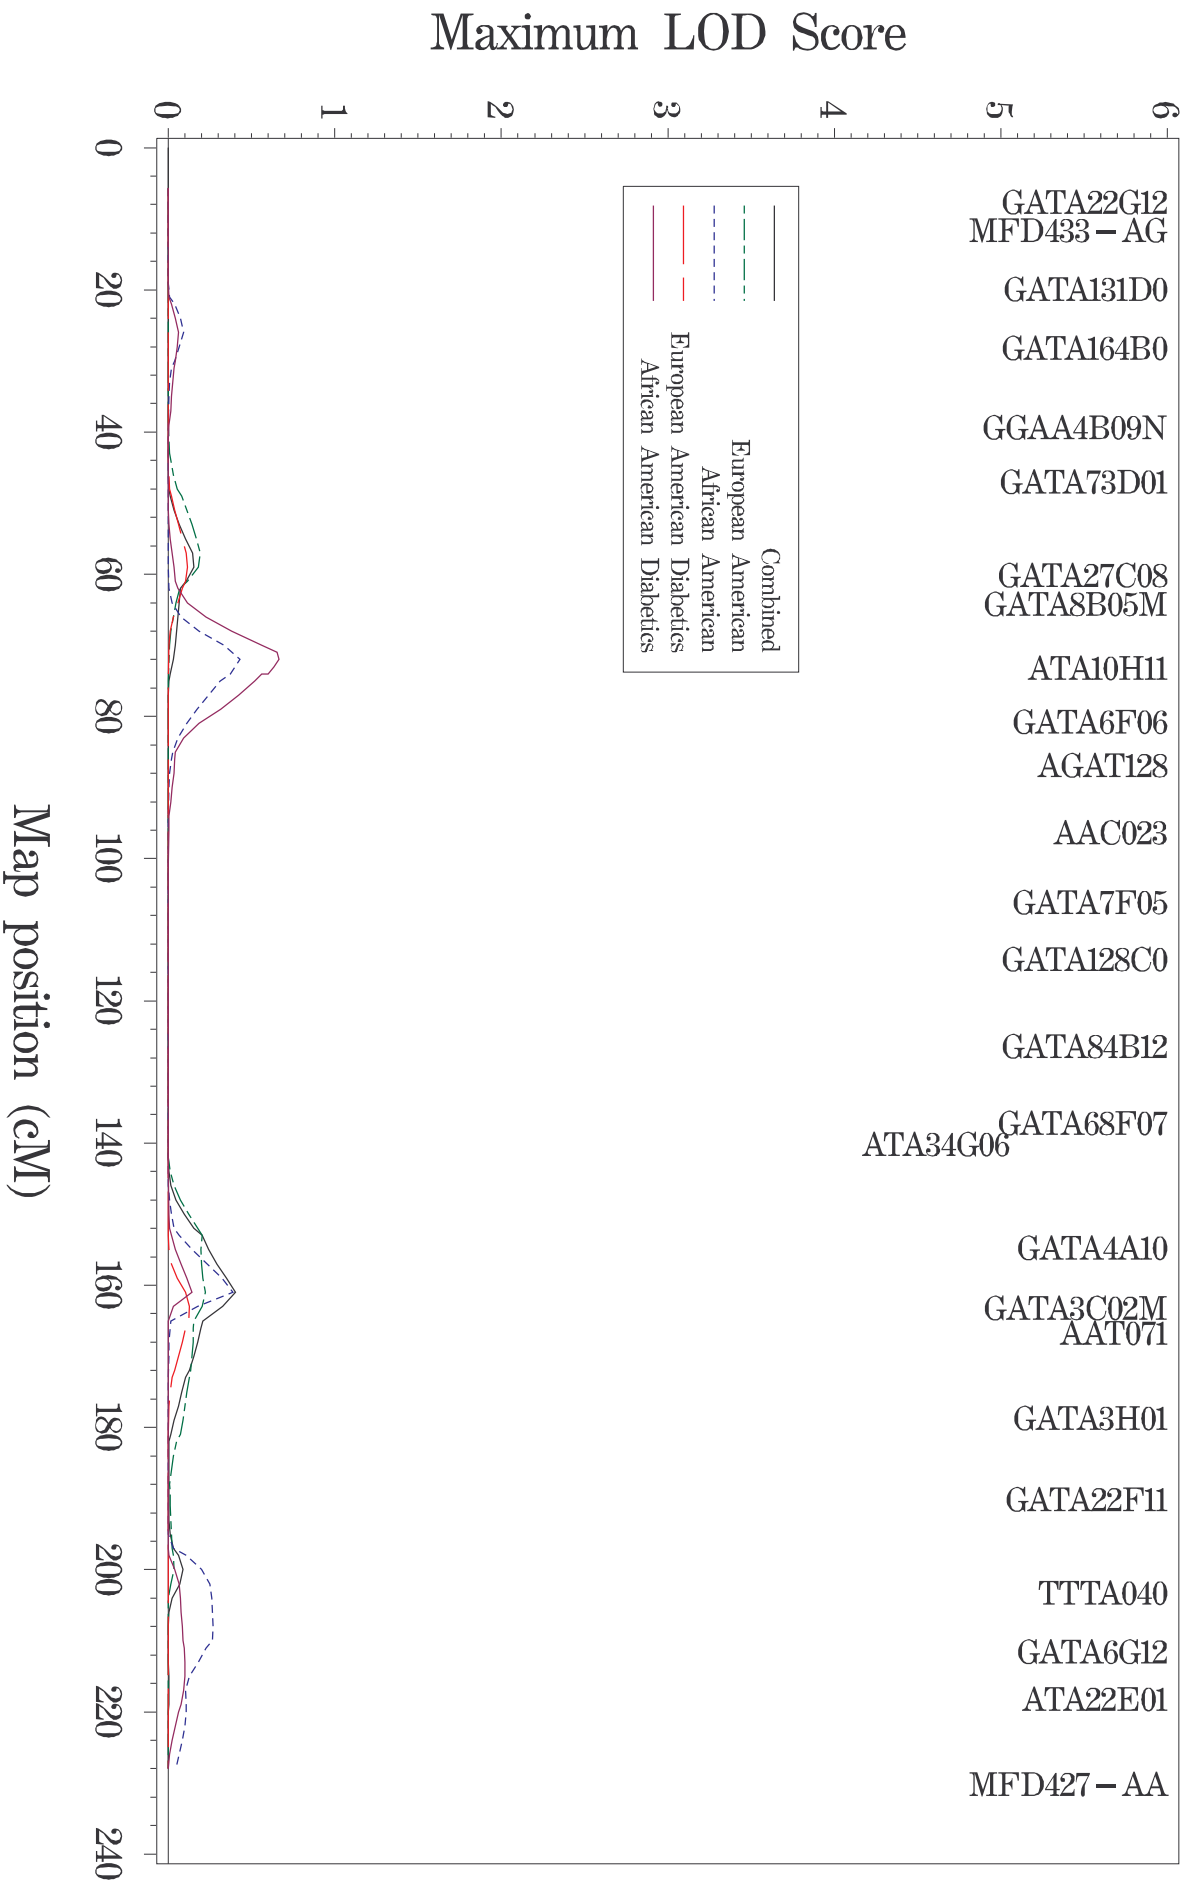

# QTL Linkage Analysis of IMT Chromosome 4

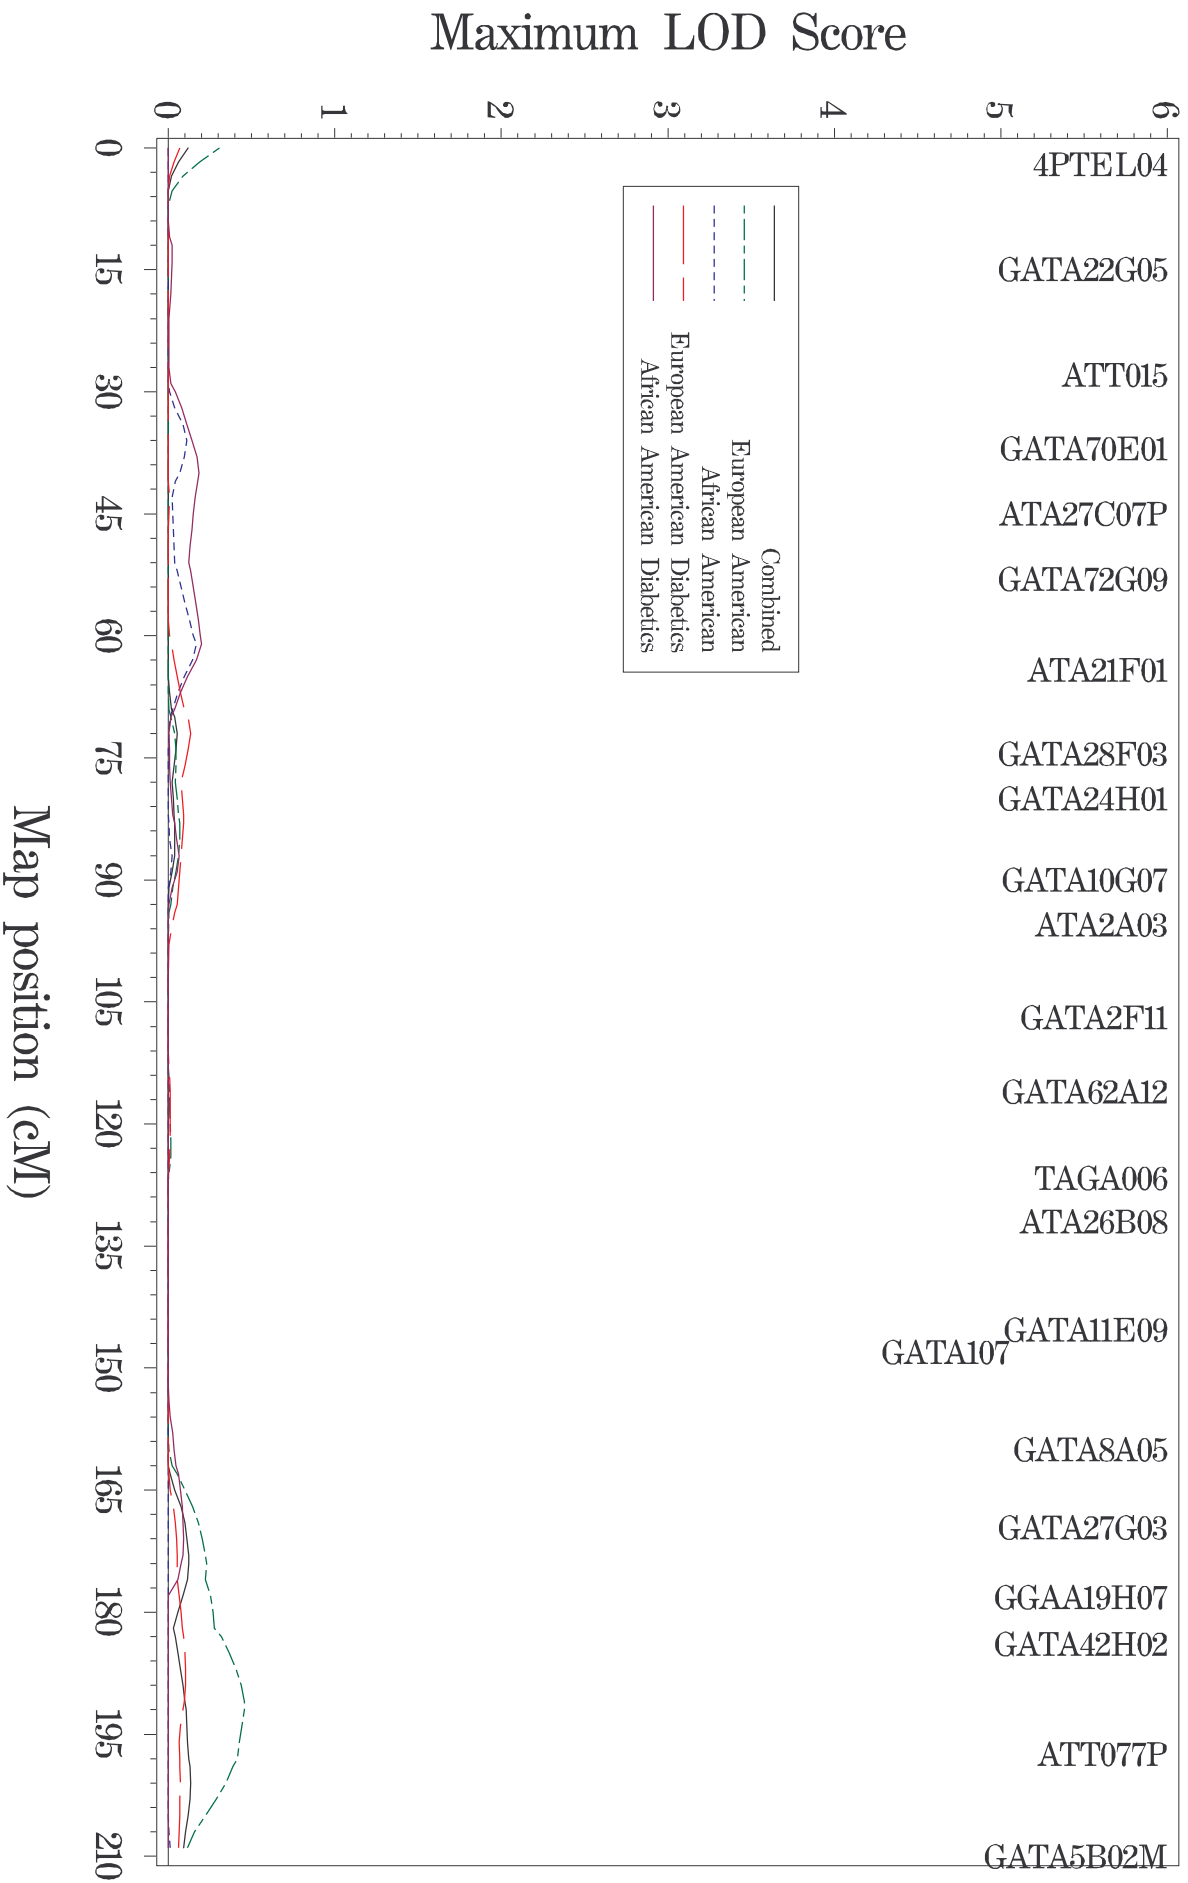

# QTL Linkage Analysis of IMT Chromosome 5

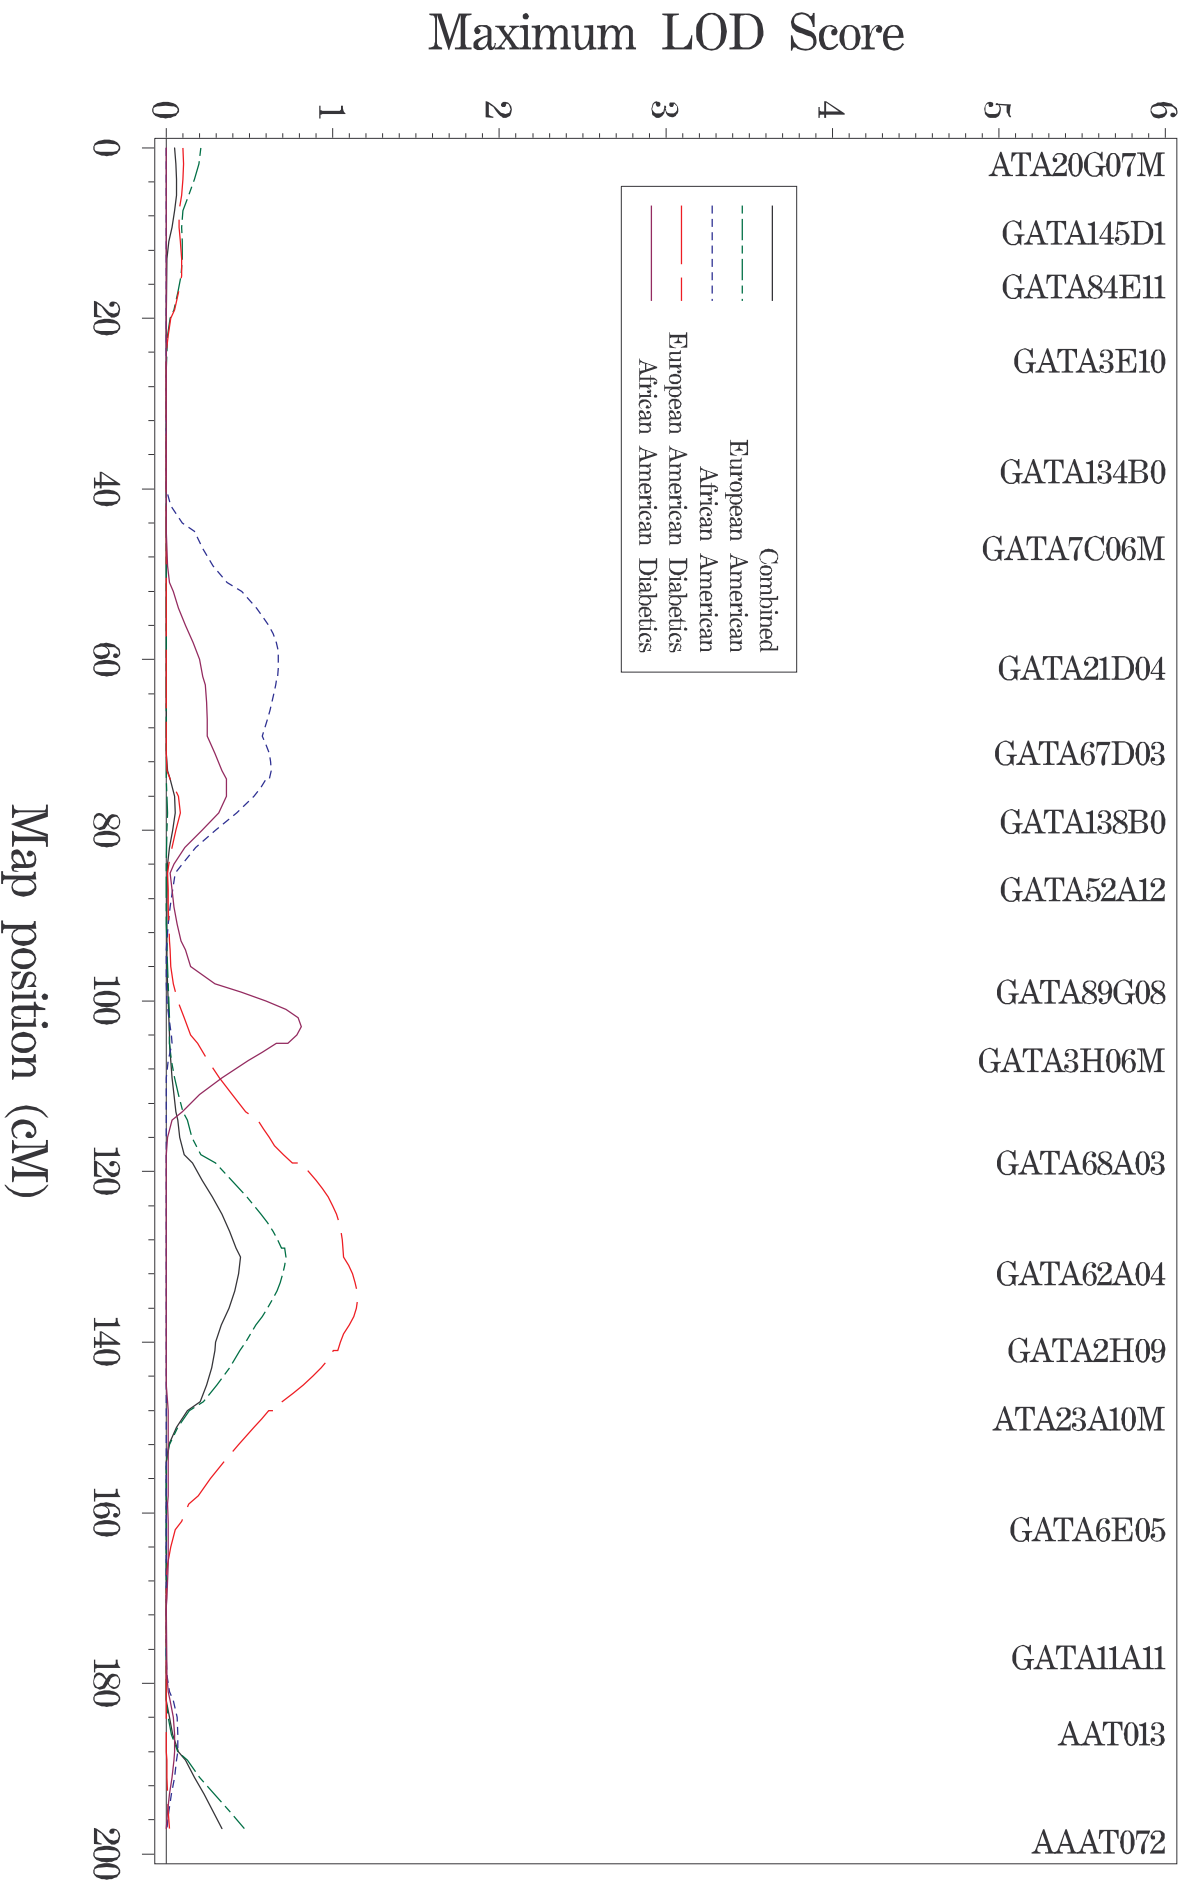

# QTL Linkage Analysis of IMT Chromosome 6

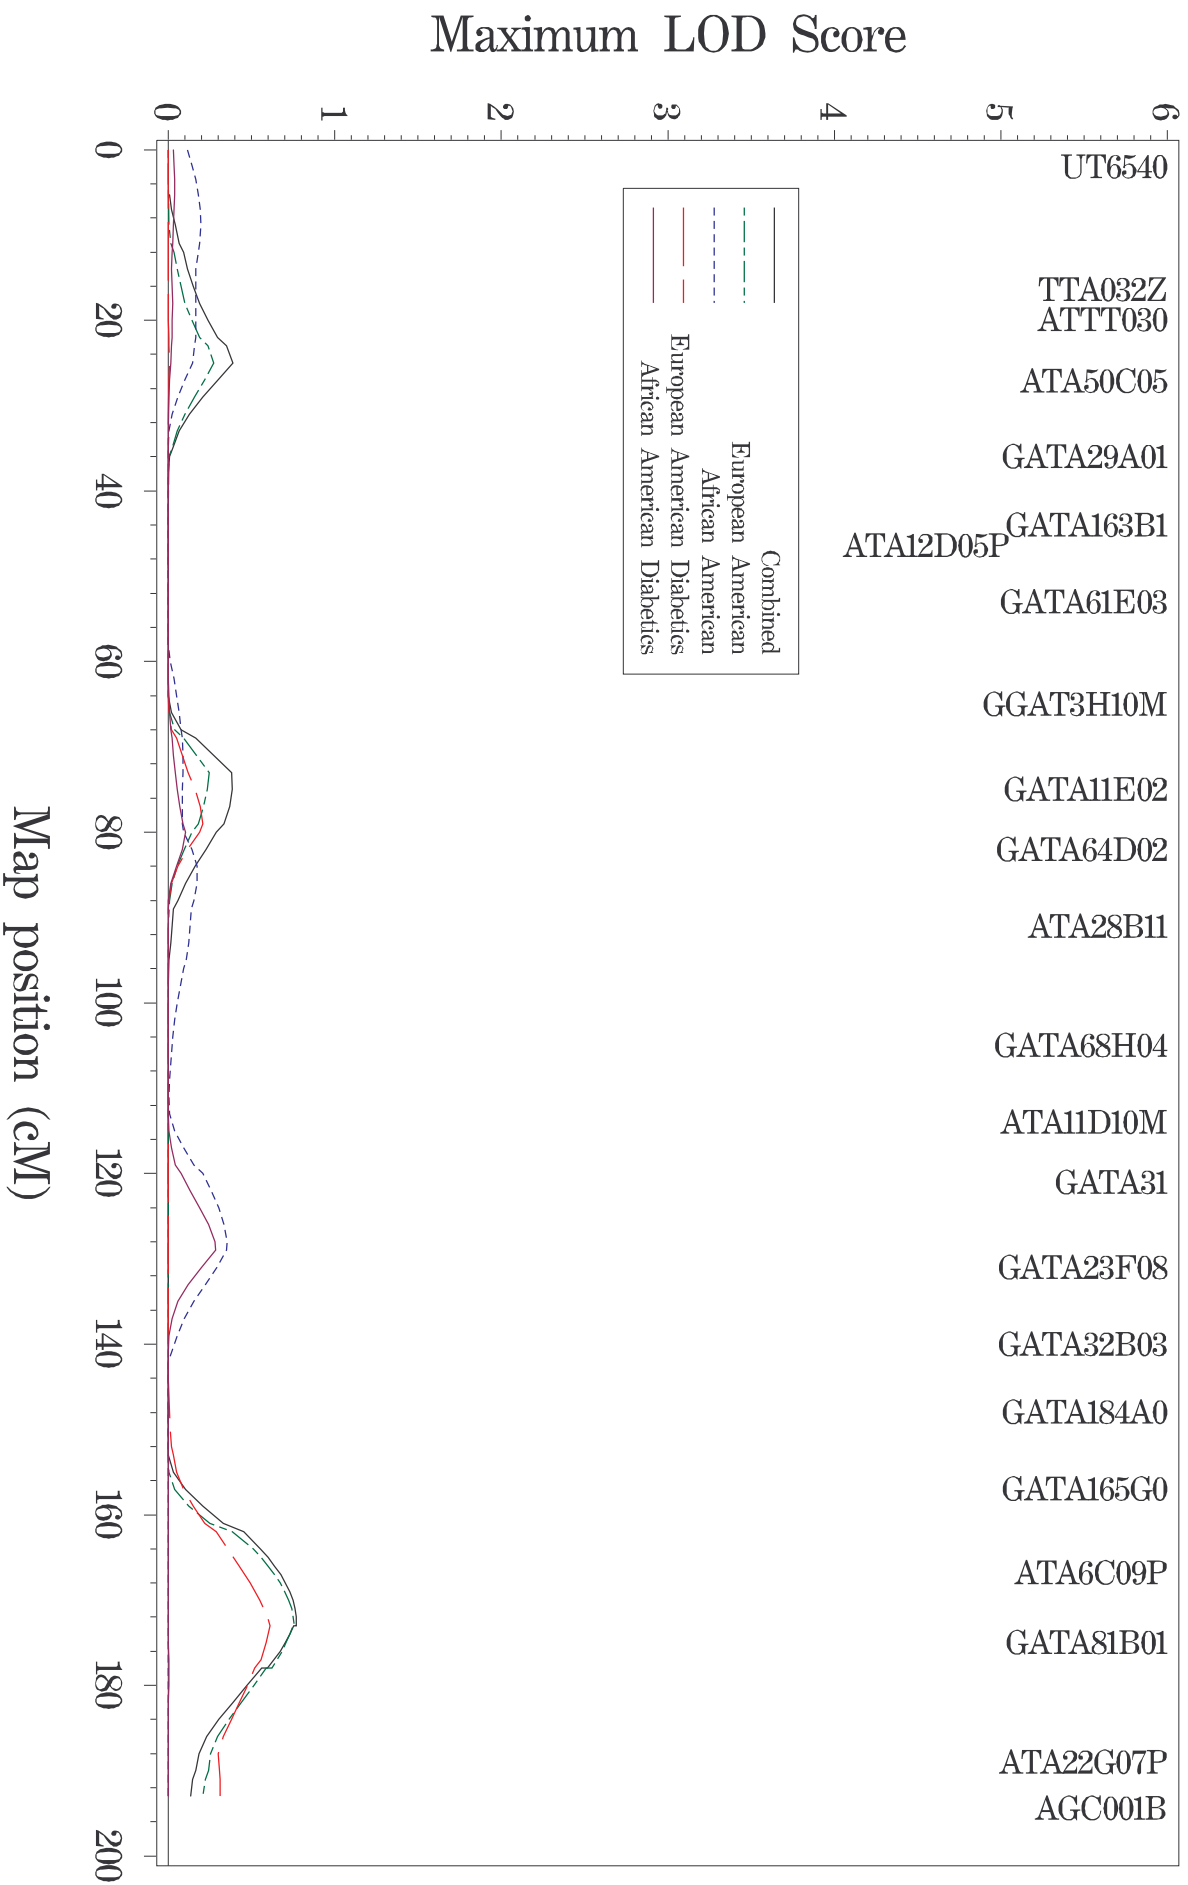

# QTL Linkage Analysis of IMT Chromosome 7

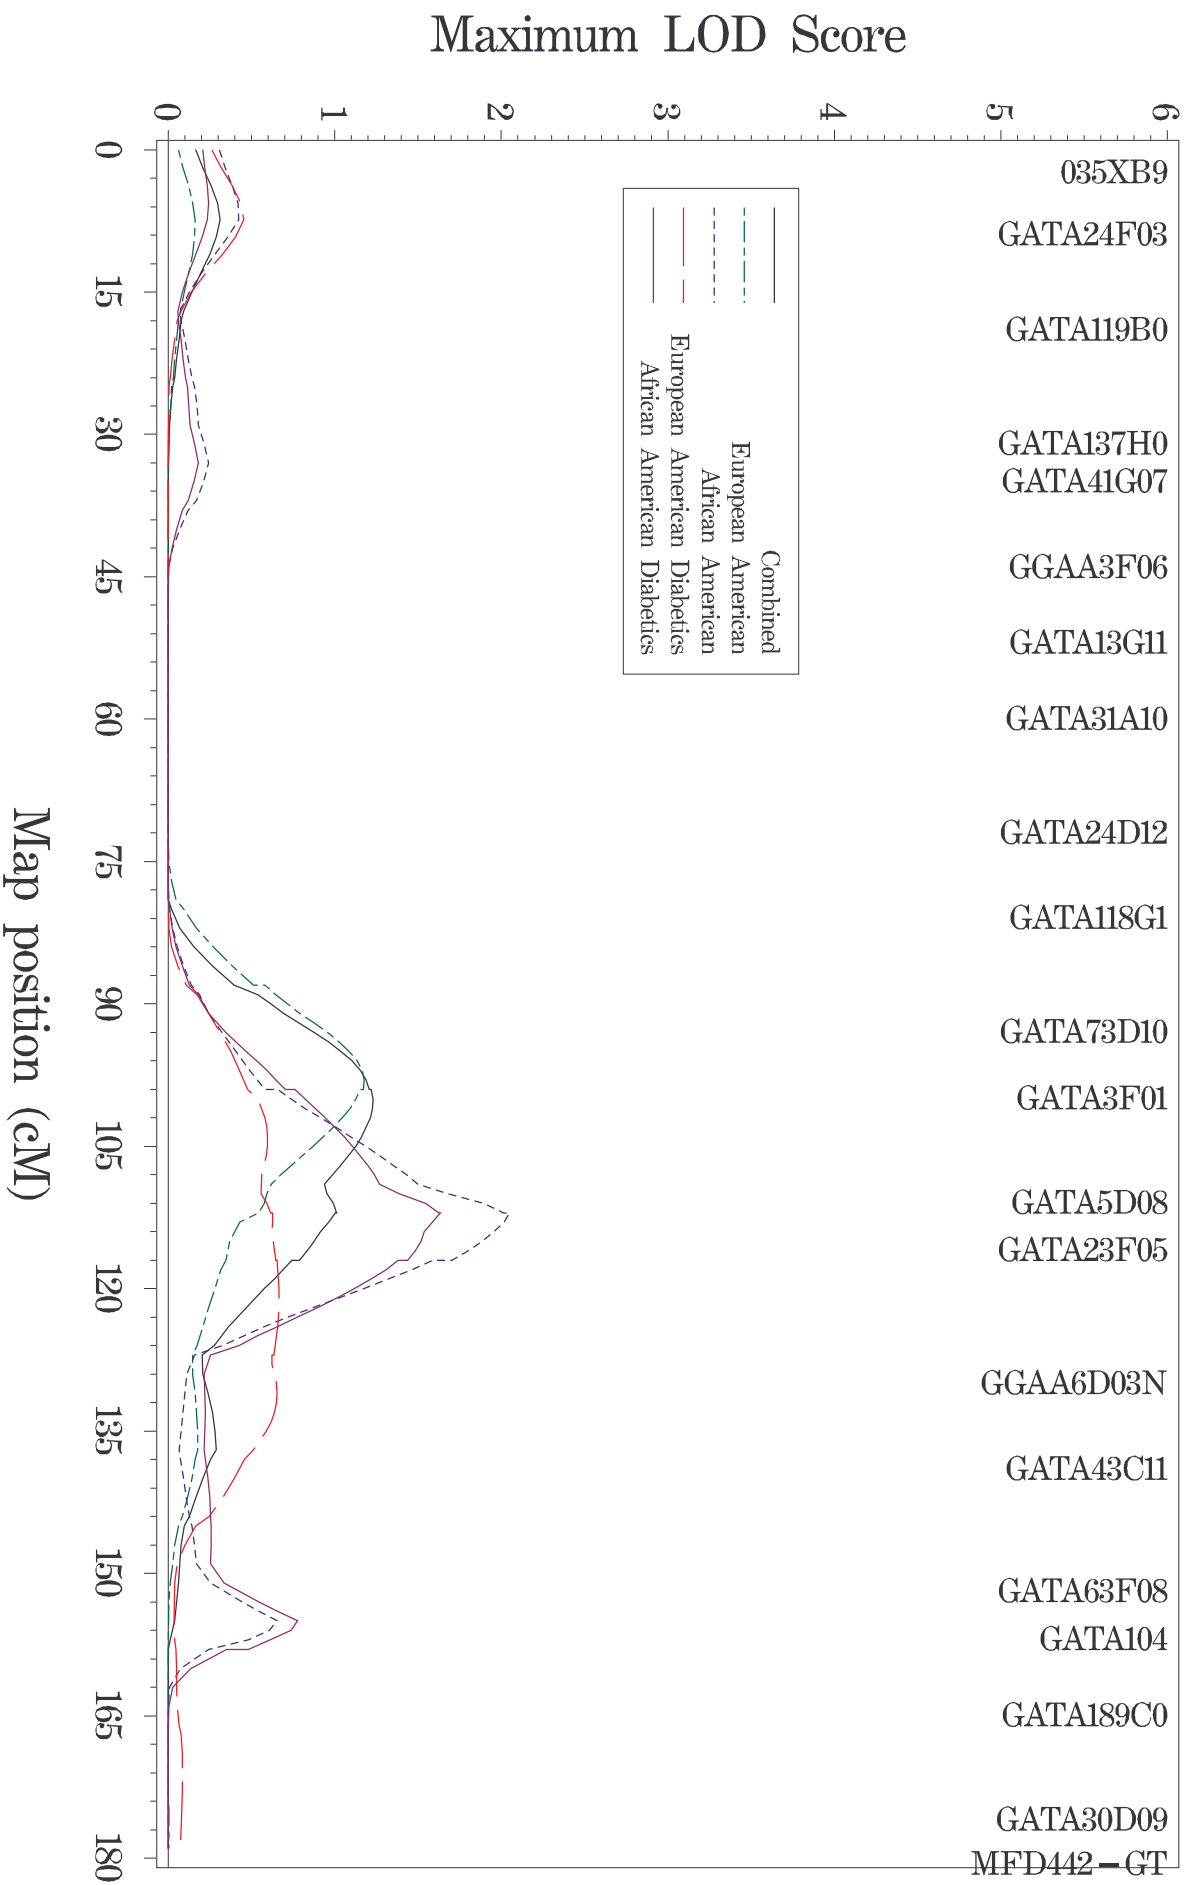

# QTL Linkage Analysis of IMT Chromosome 8

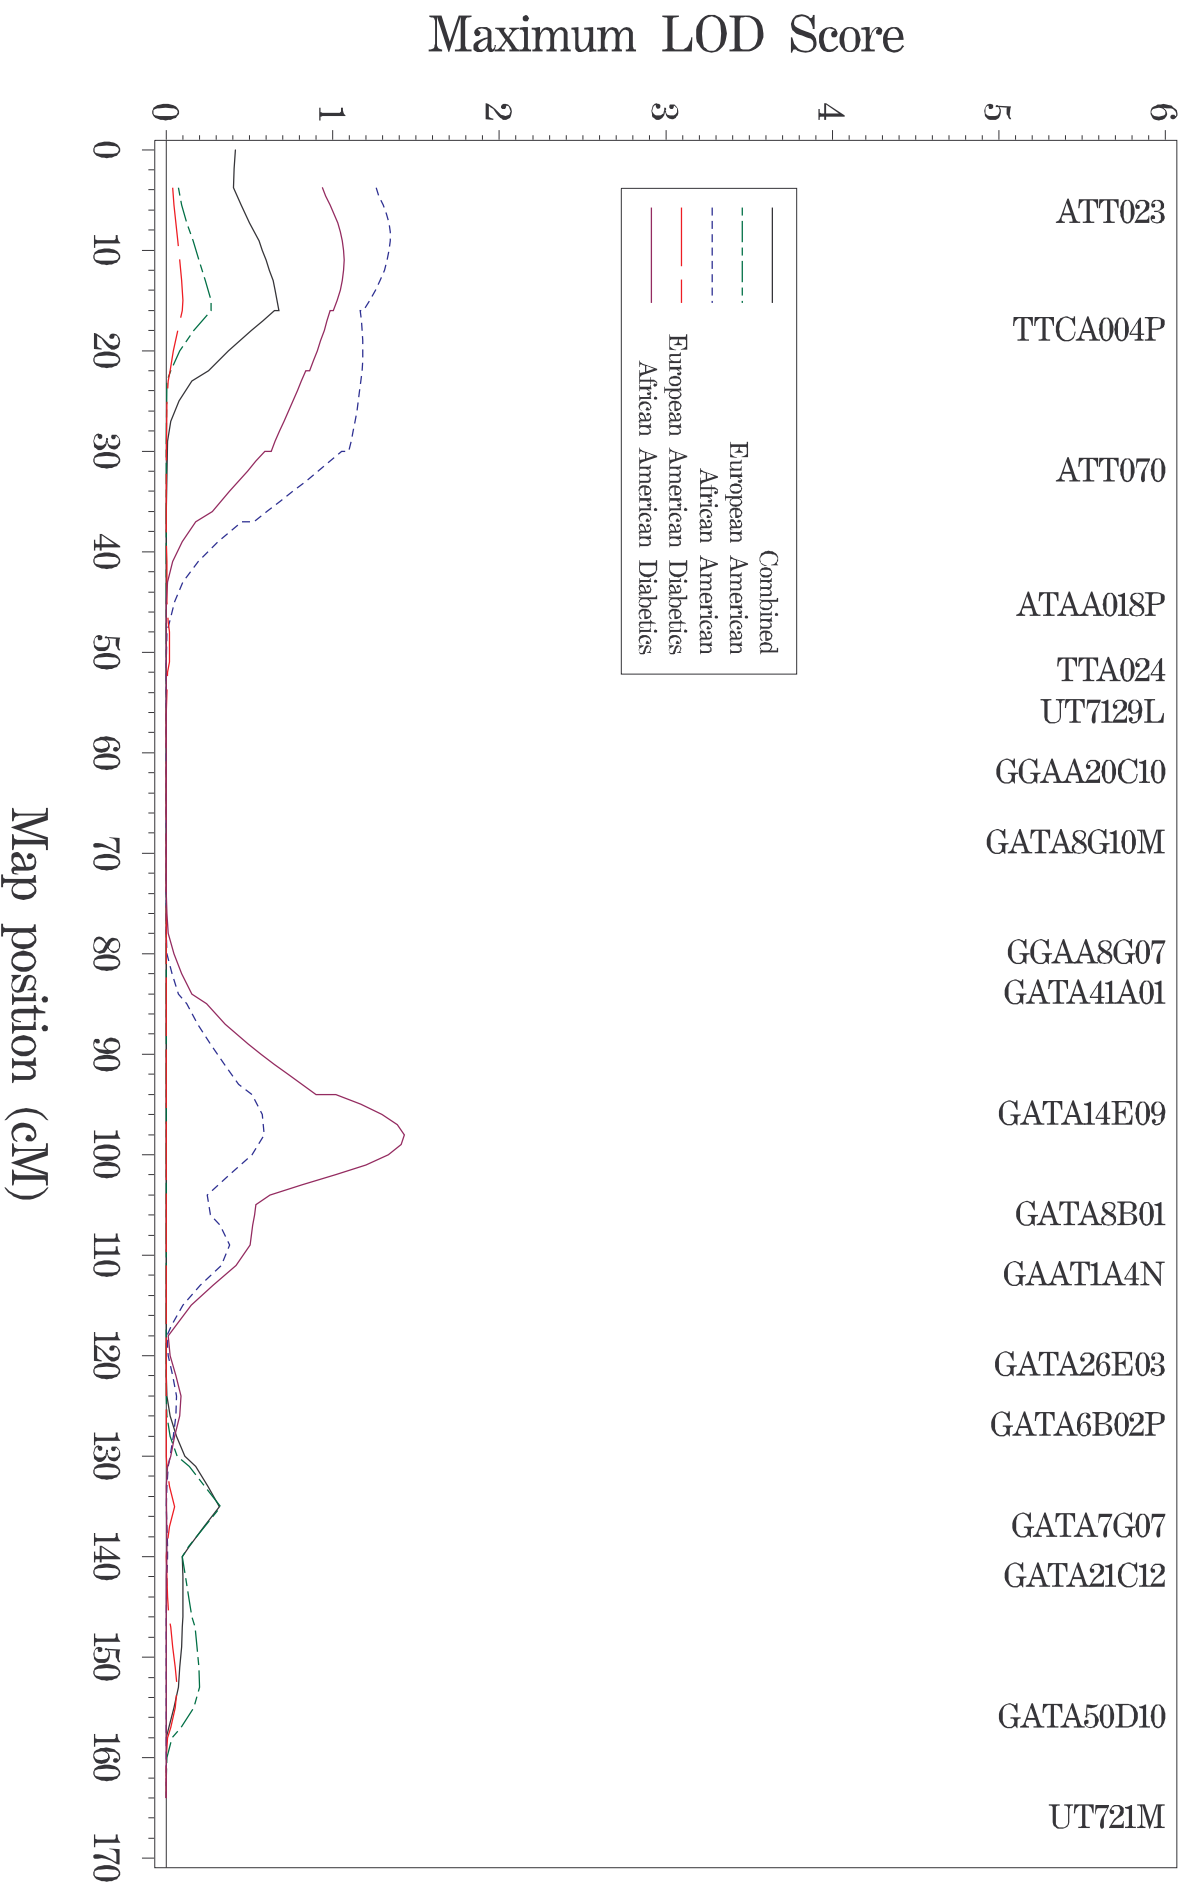



# QTL Linkage Analysis of IMT Chromosome 9

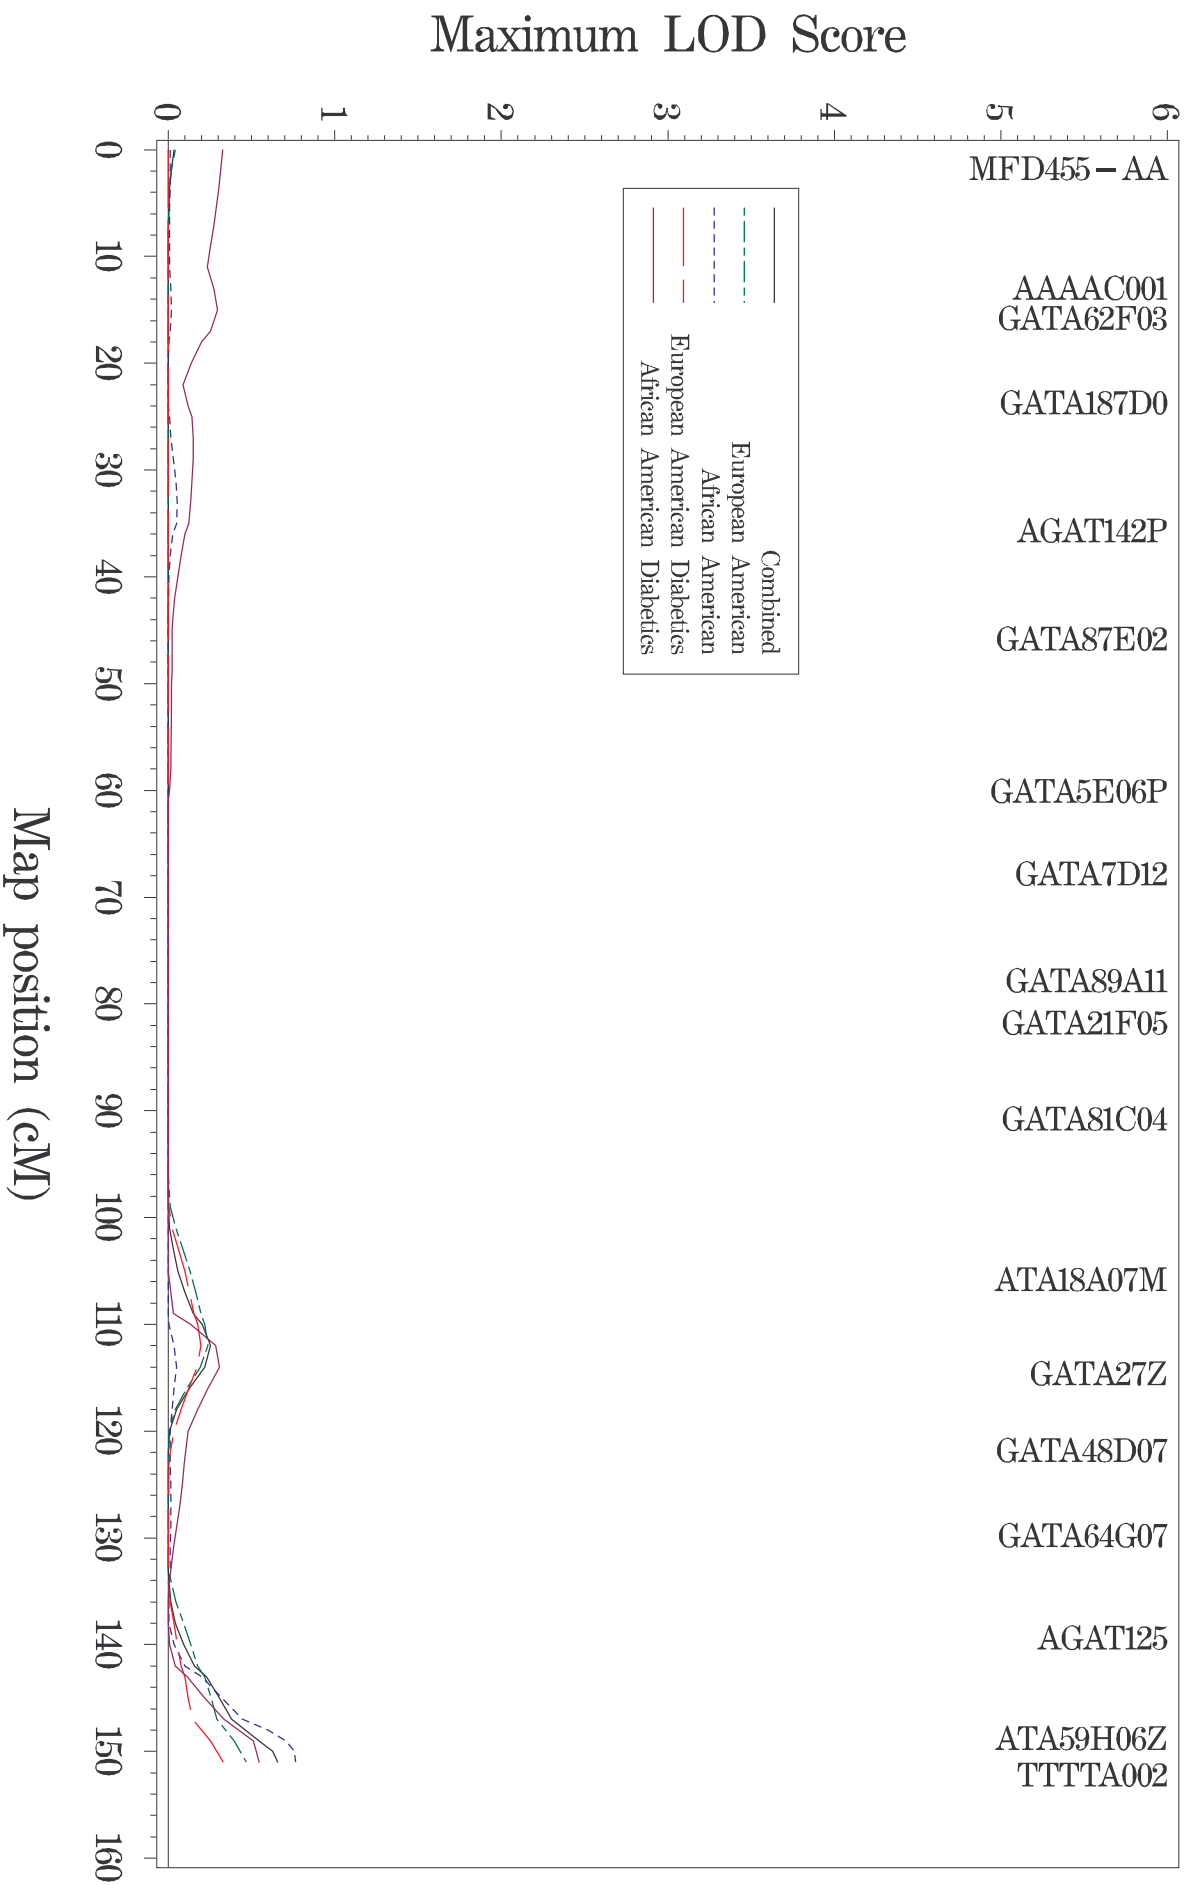

# QTL Linkage Analysis of IMT Chromosome 10

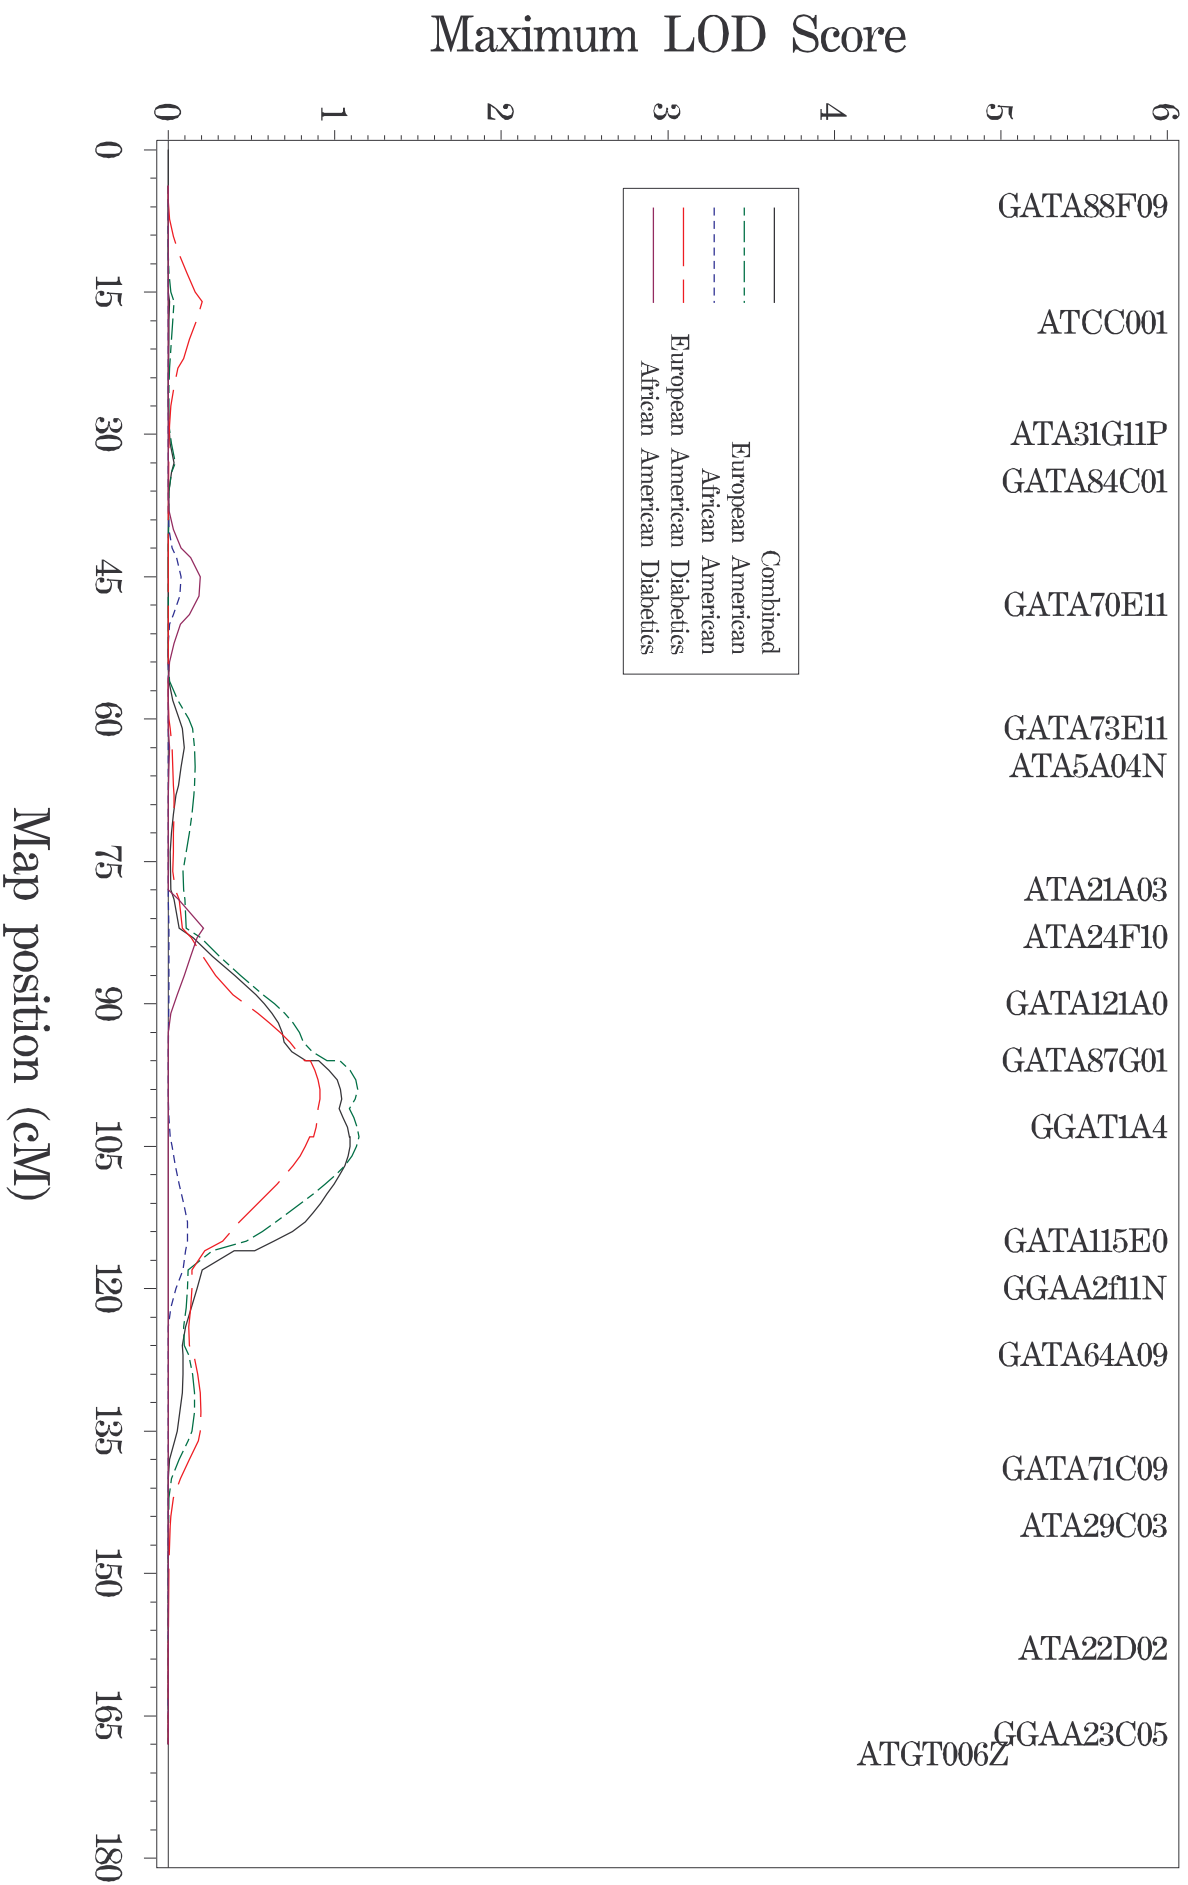

# QTL Linkage Analysis of IMT Chromosome 11

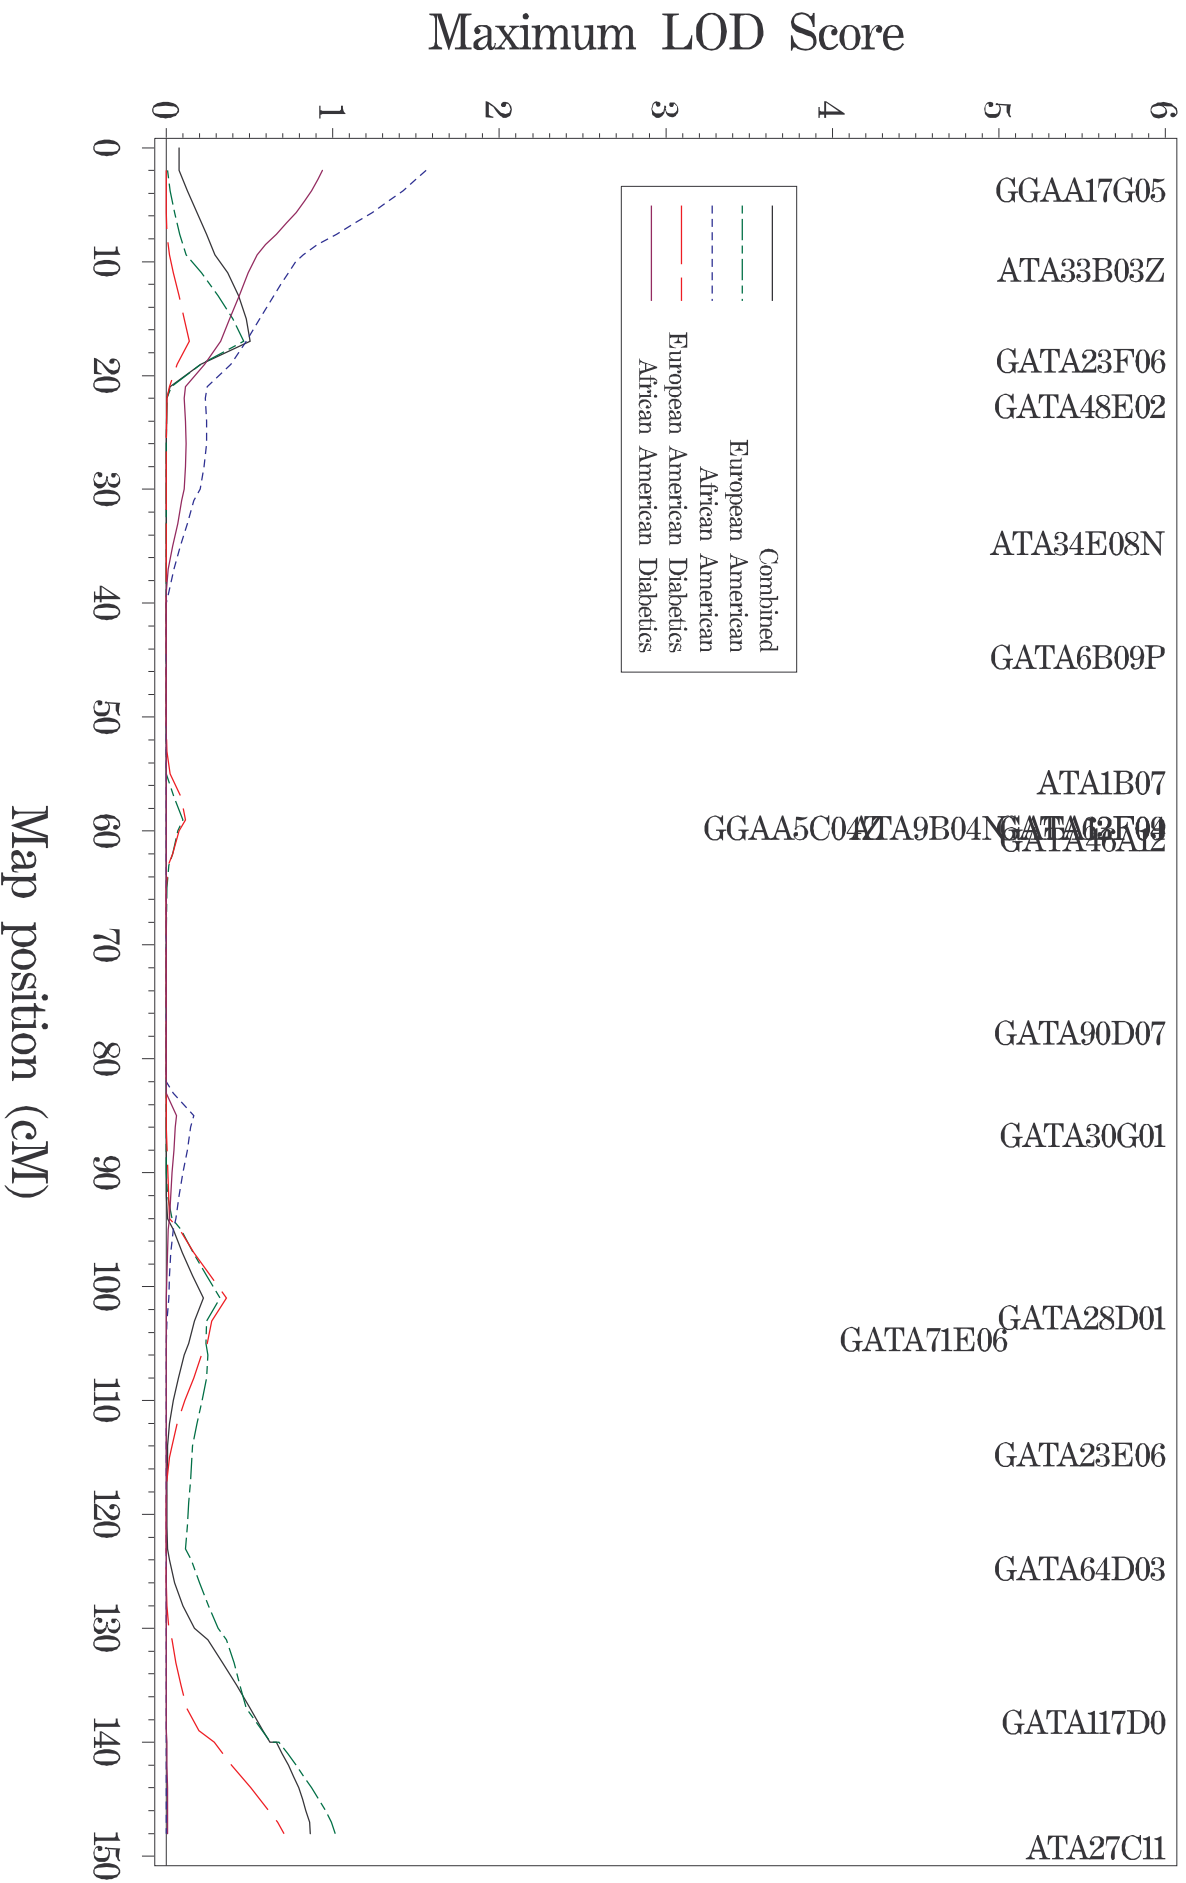

# QTL Linkage Analysis of IMT Chromosome 12

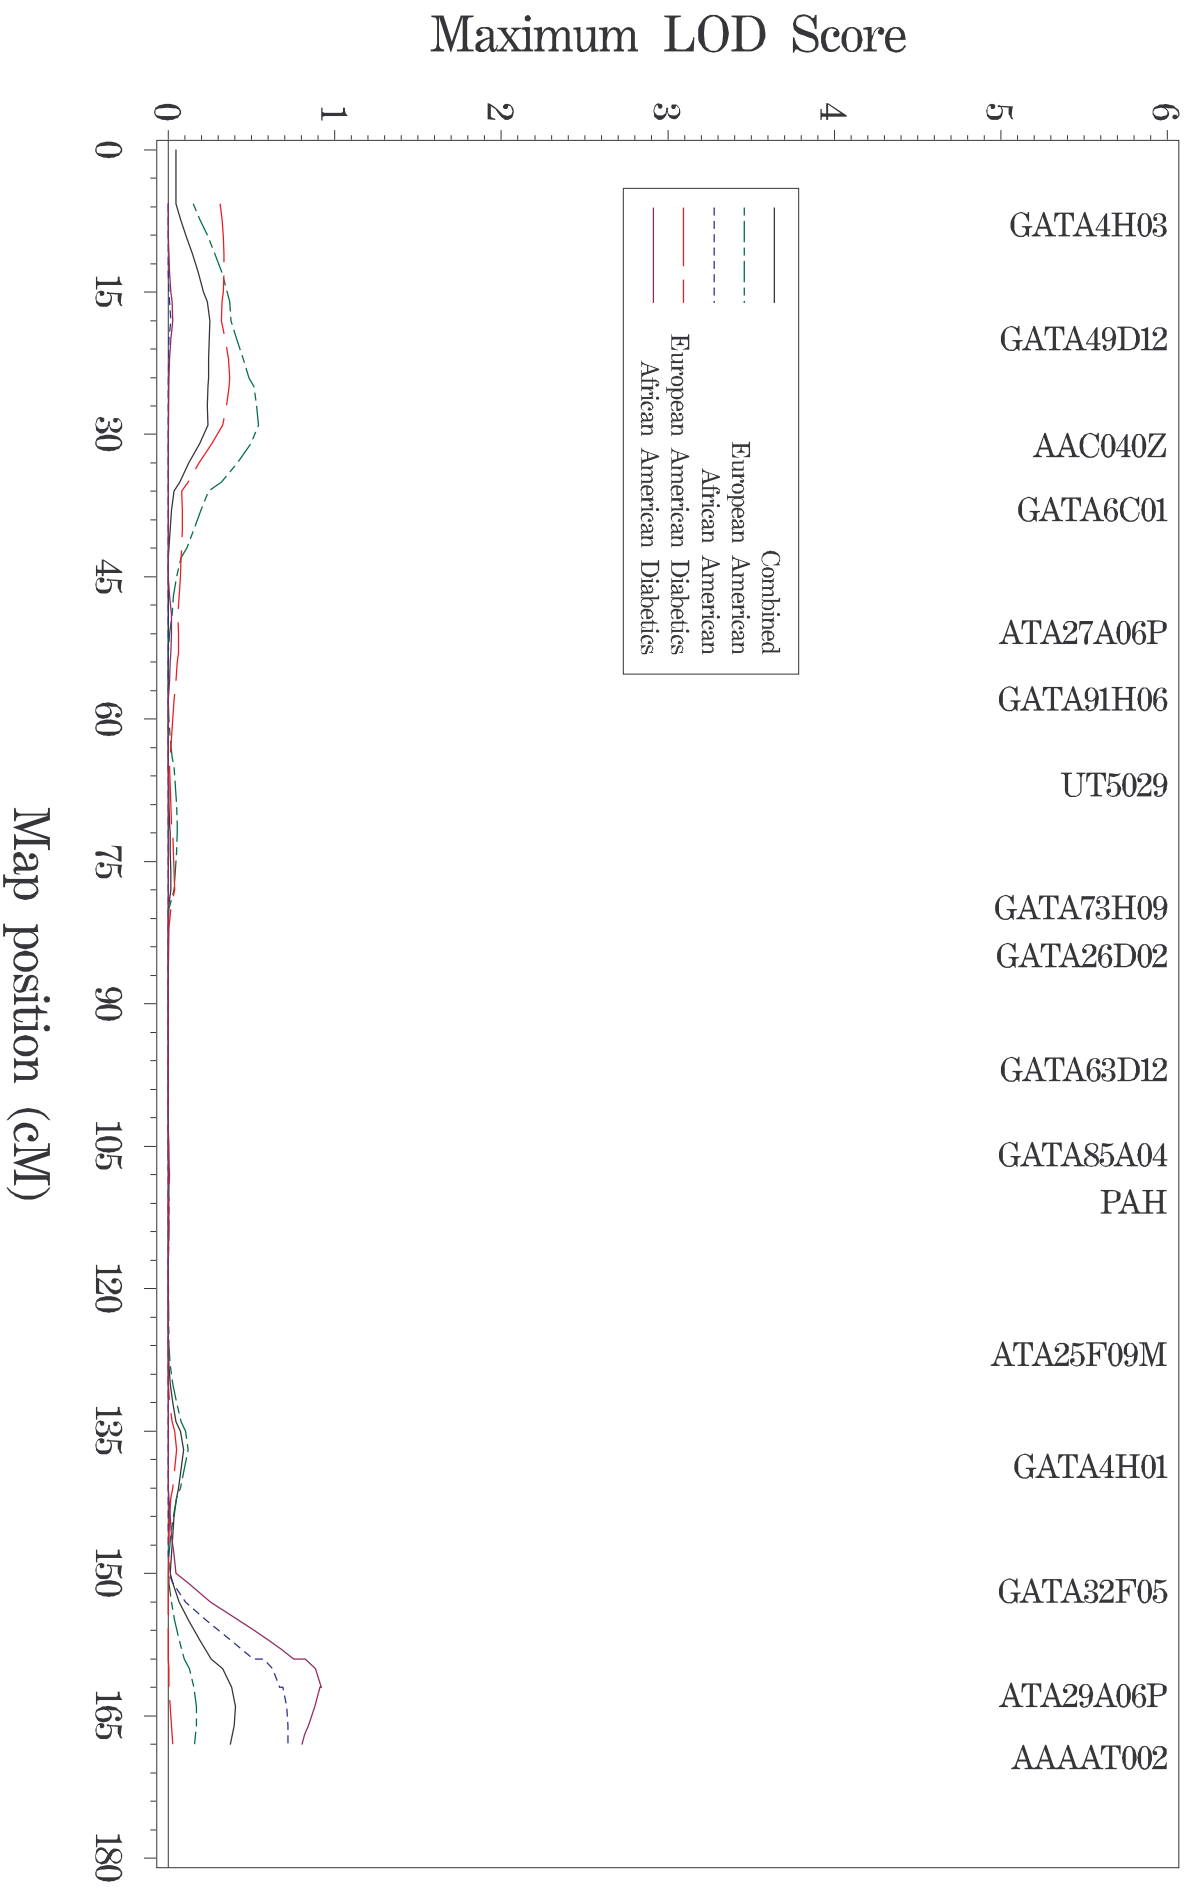

# QTL Linkage Analysis of IMT Chromosome 13

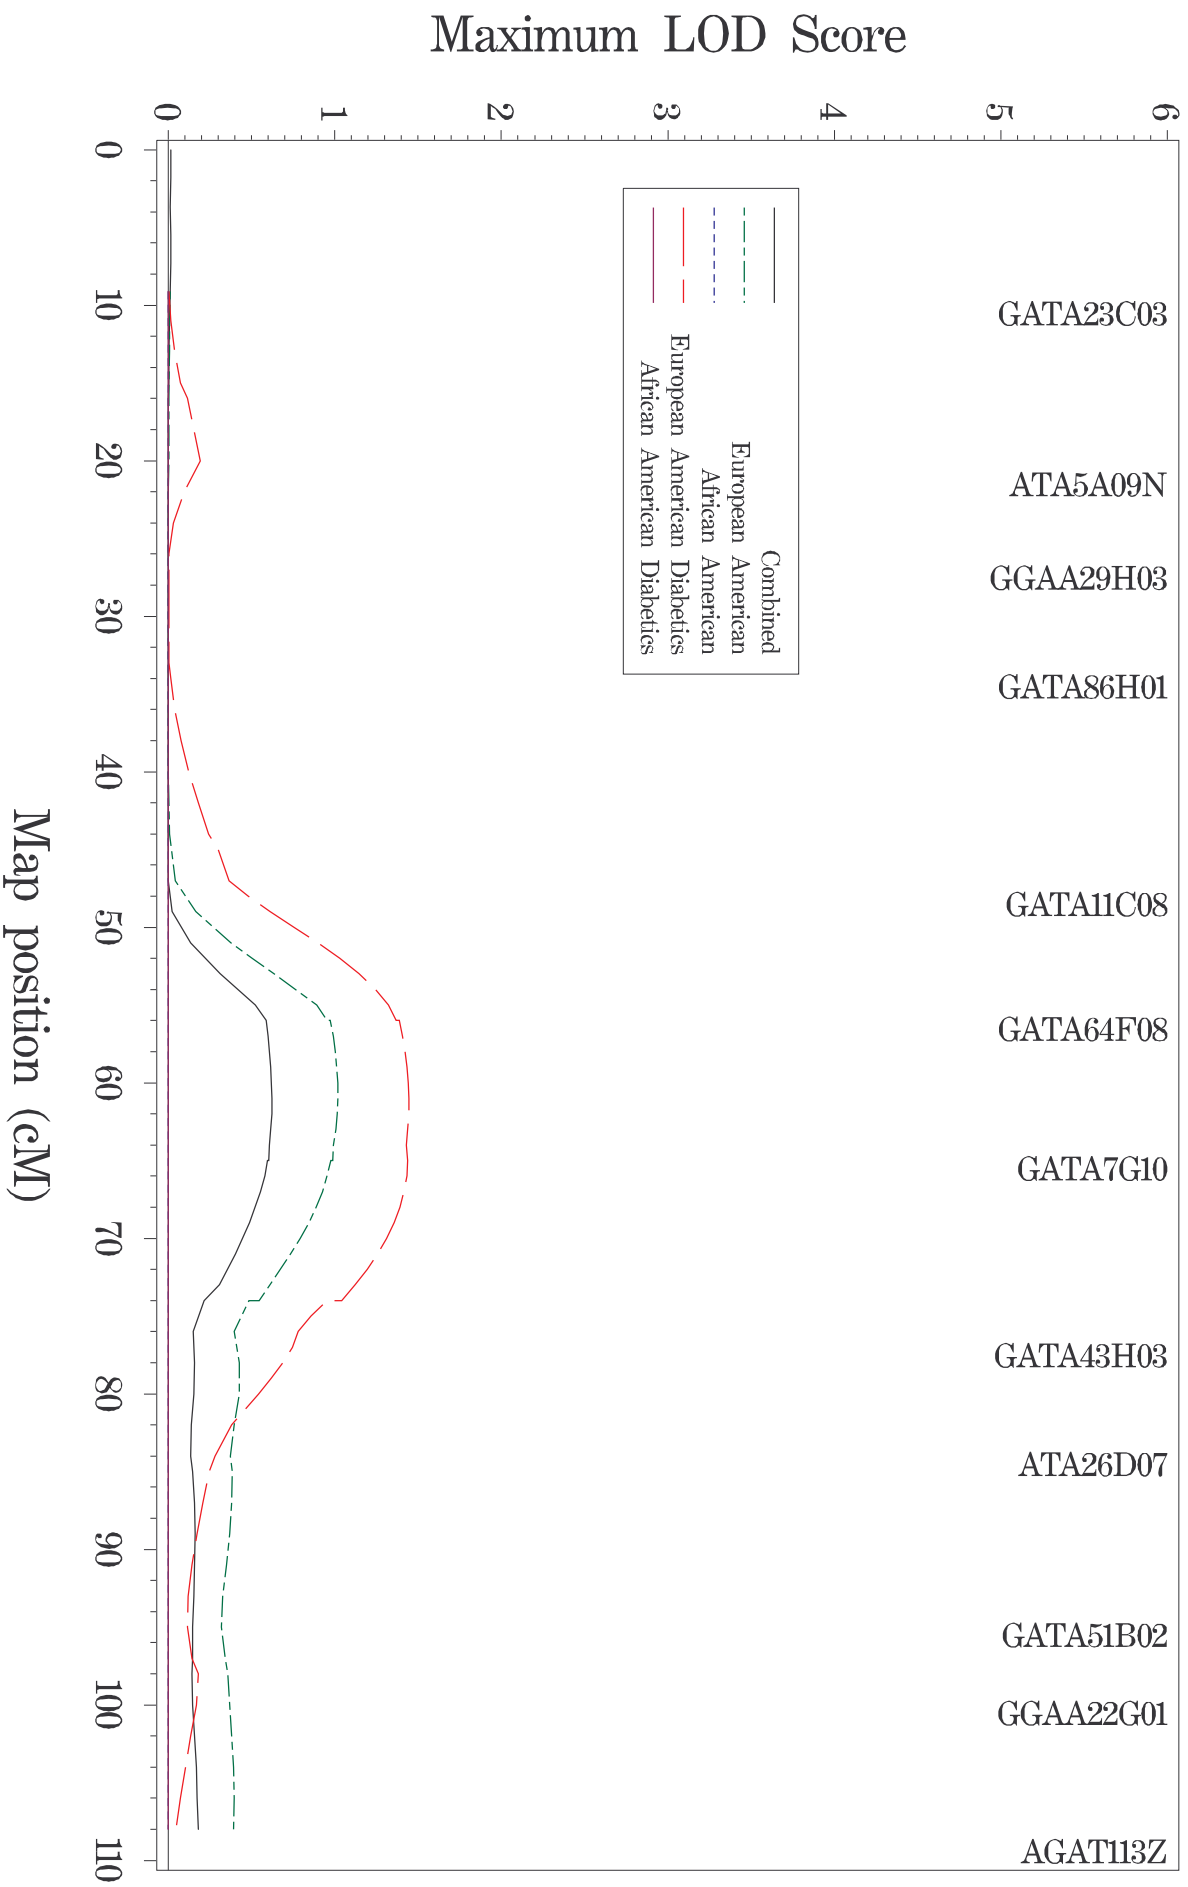

# QTL Linkage Analysis of IMT Chromosome 14

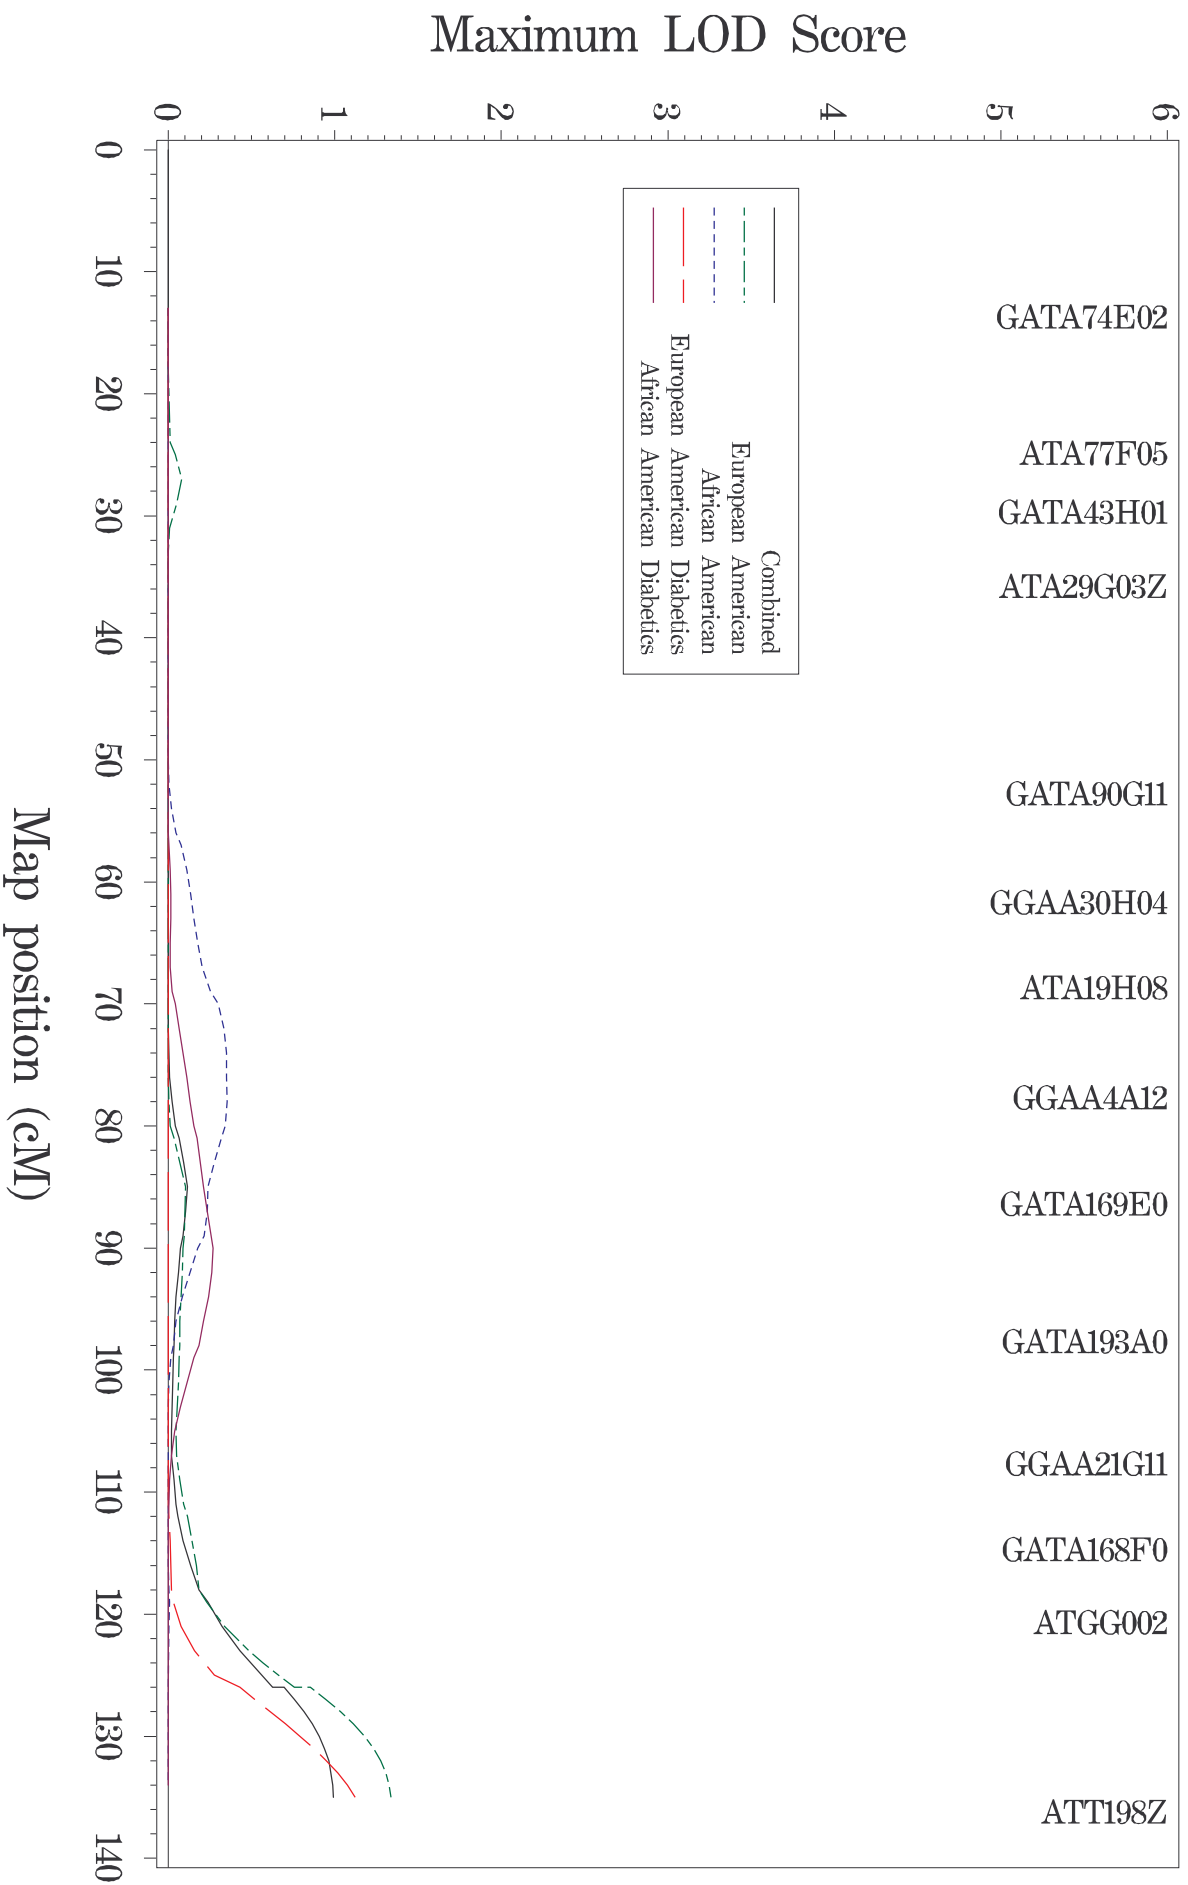

# QTL Linkage Analysis of IMT Chromosome 15

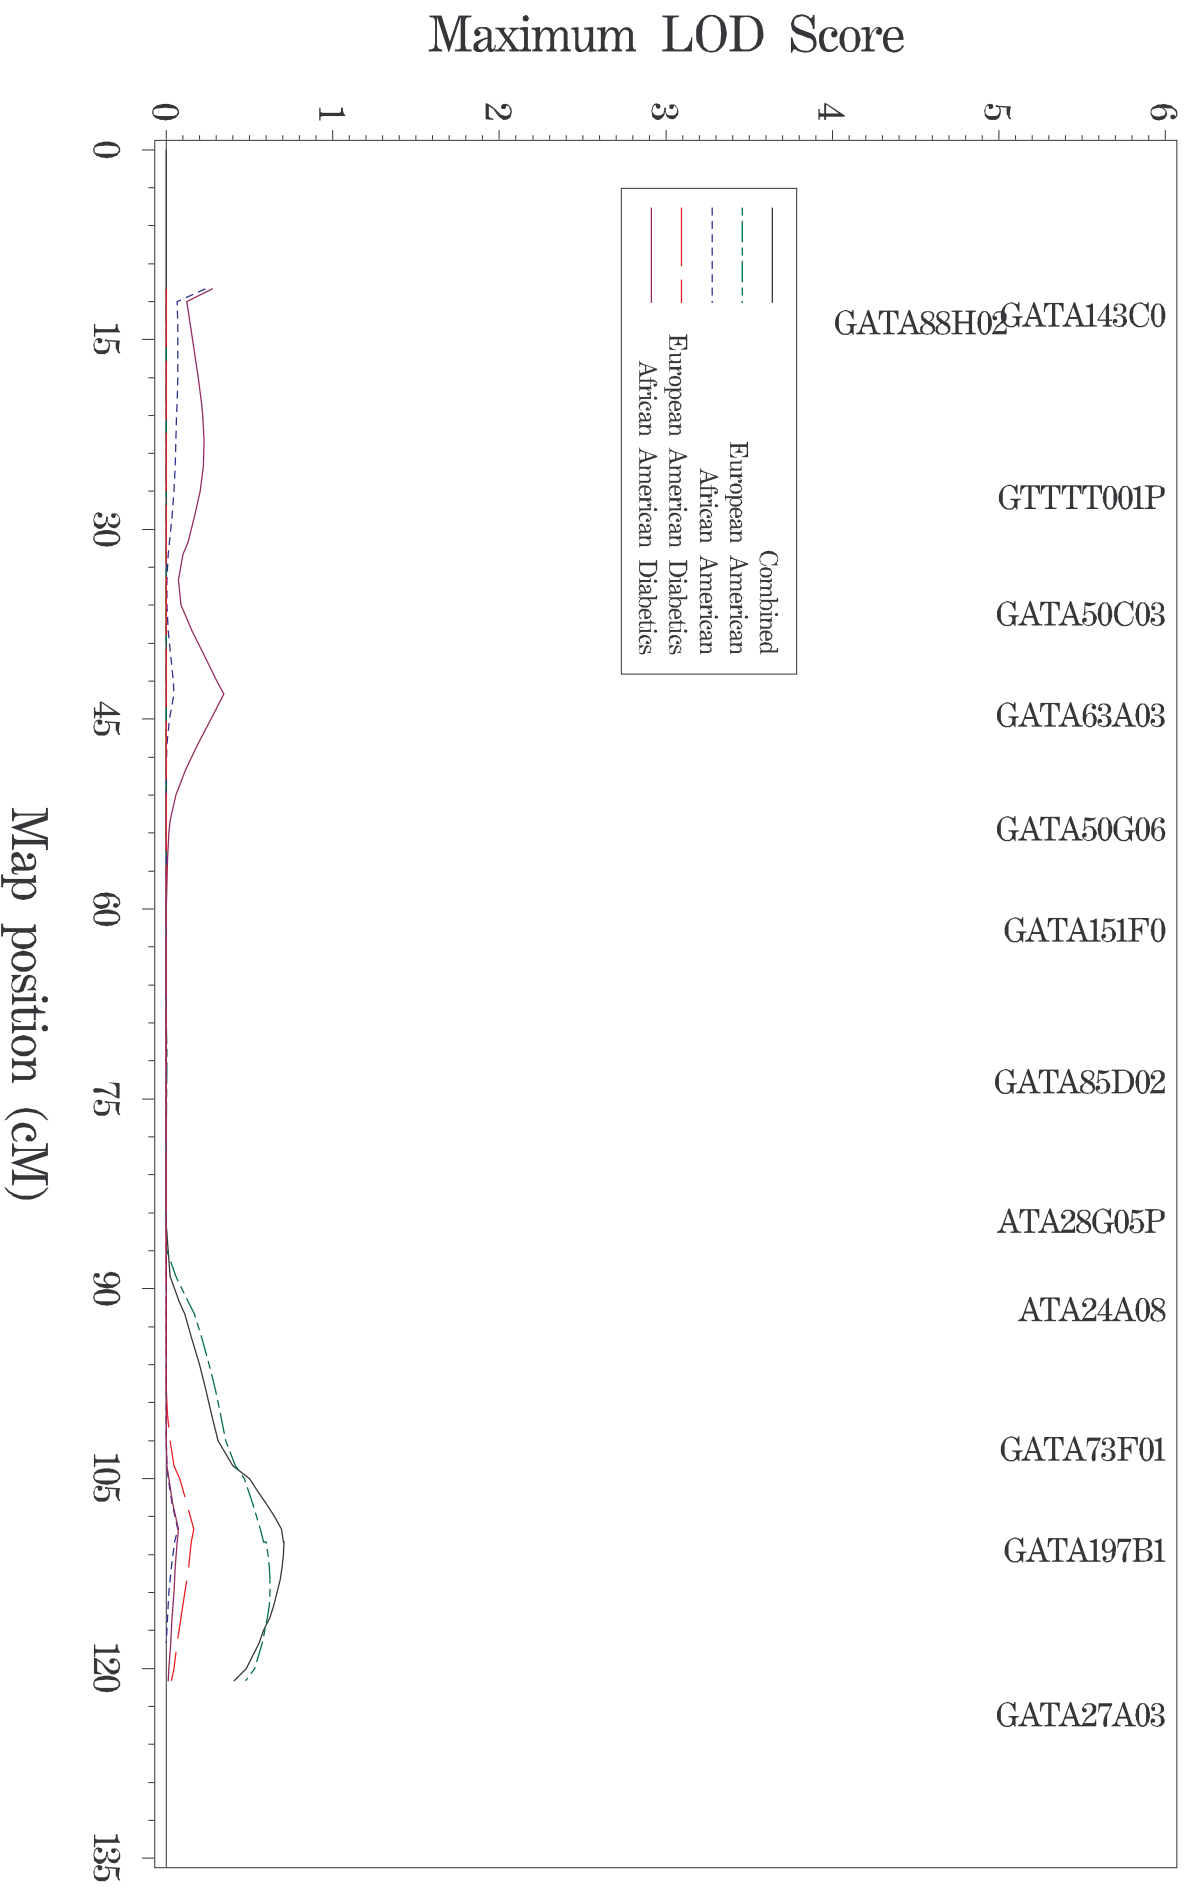

# QTL Linkage Analysis of IMT Chromosome 16

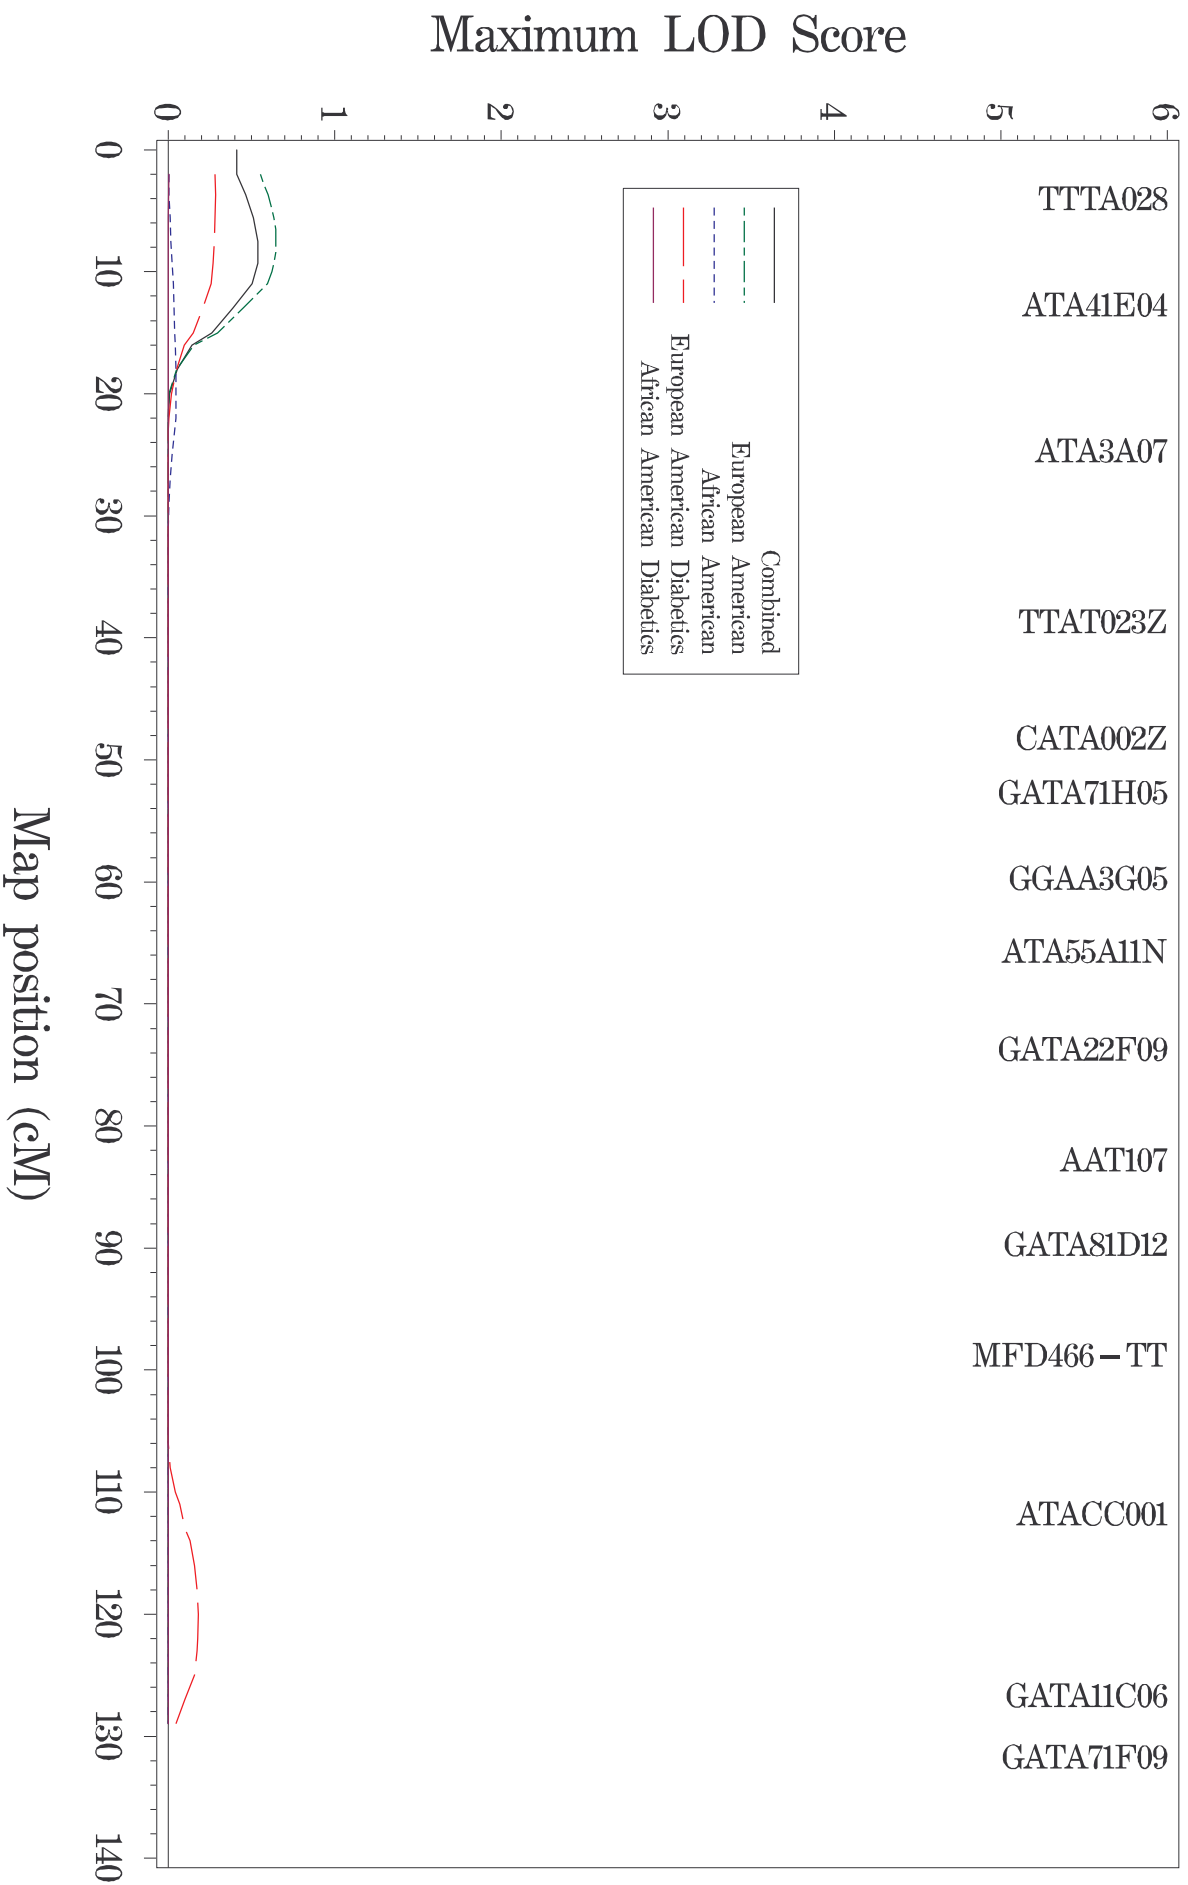



# QTL Linkage Analysis of IMT Chromosome 17

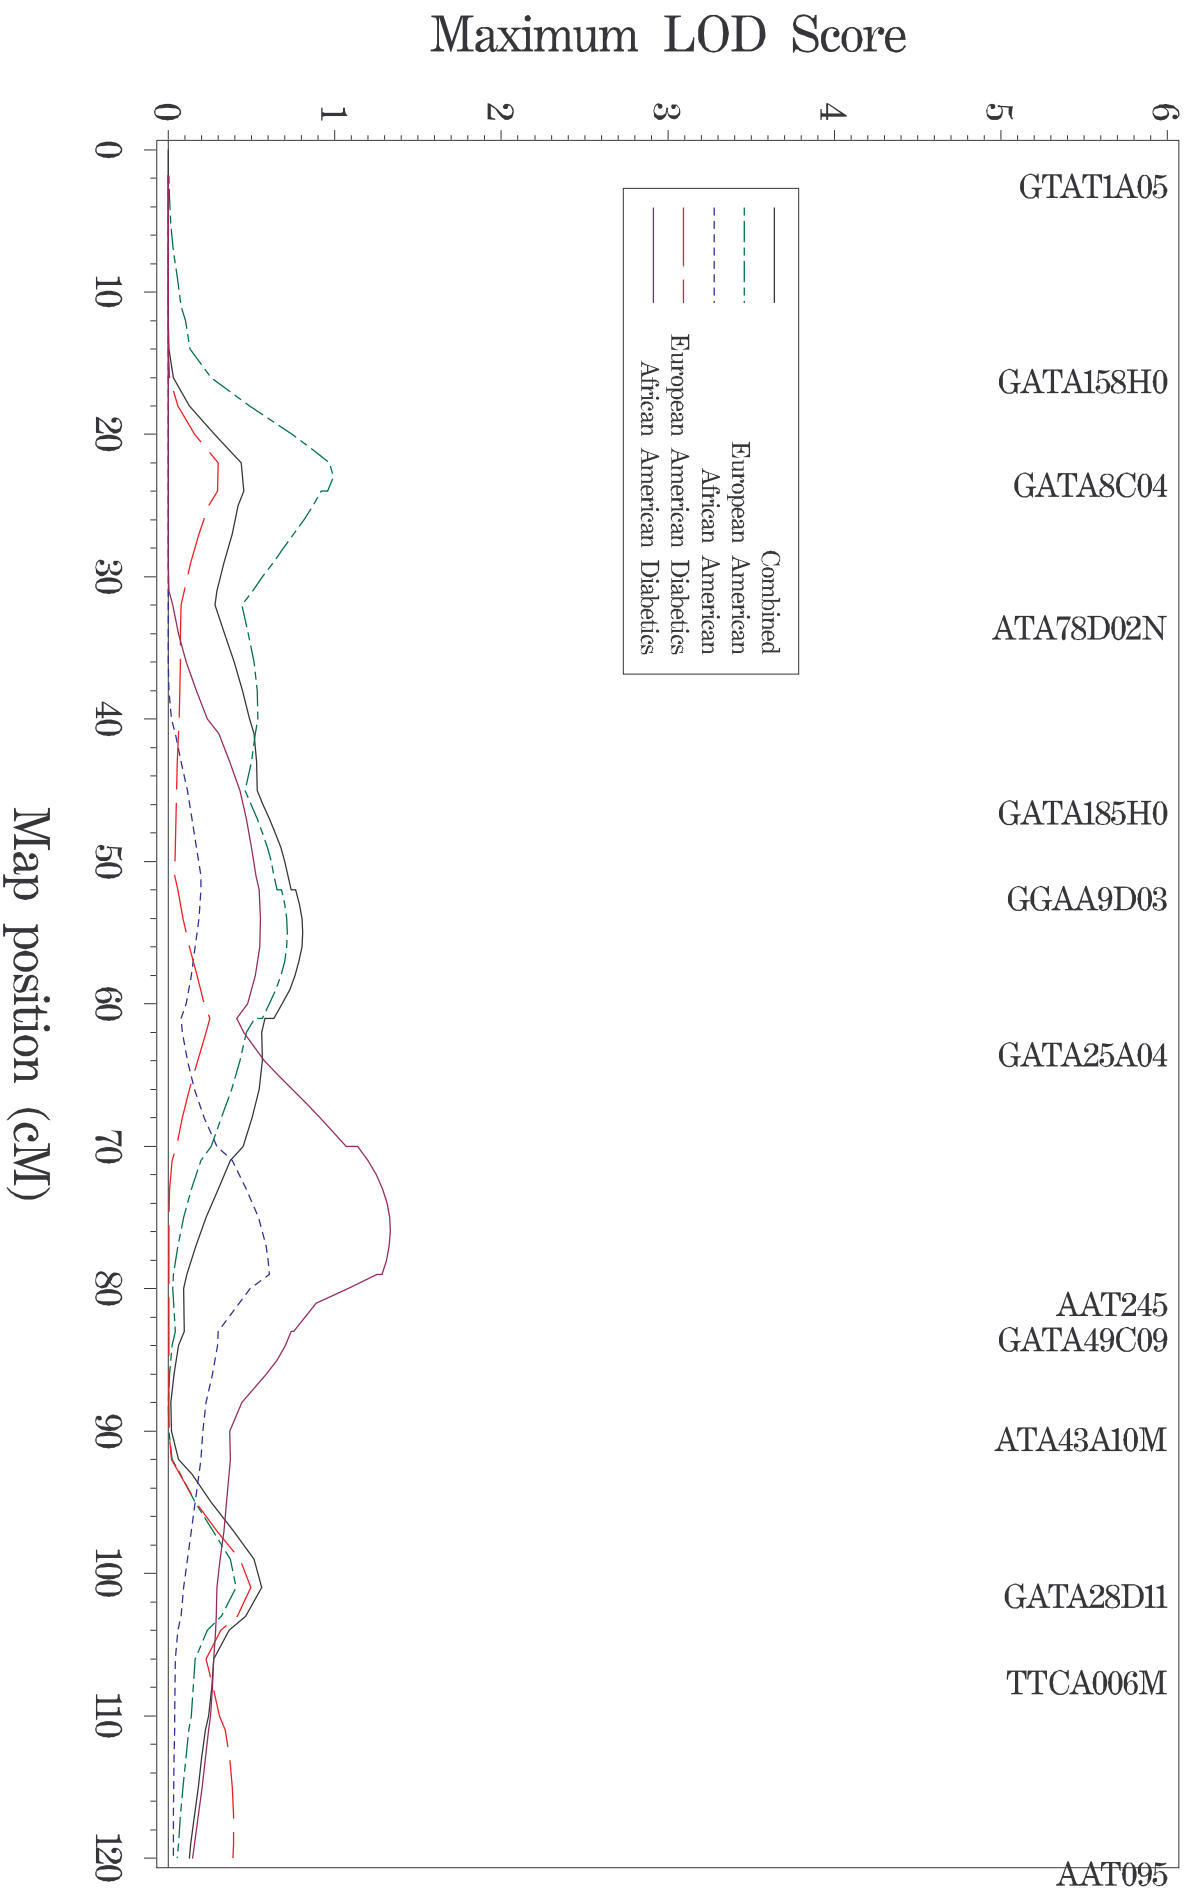

# QTL Linkage Analysis of IMT Chromosome 18

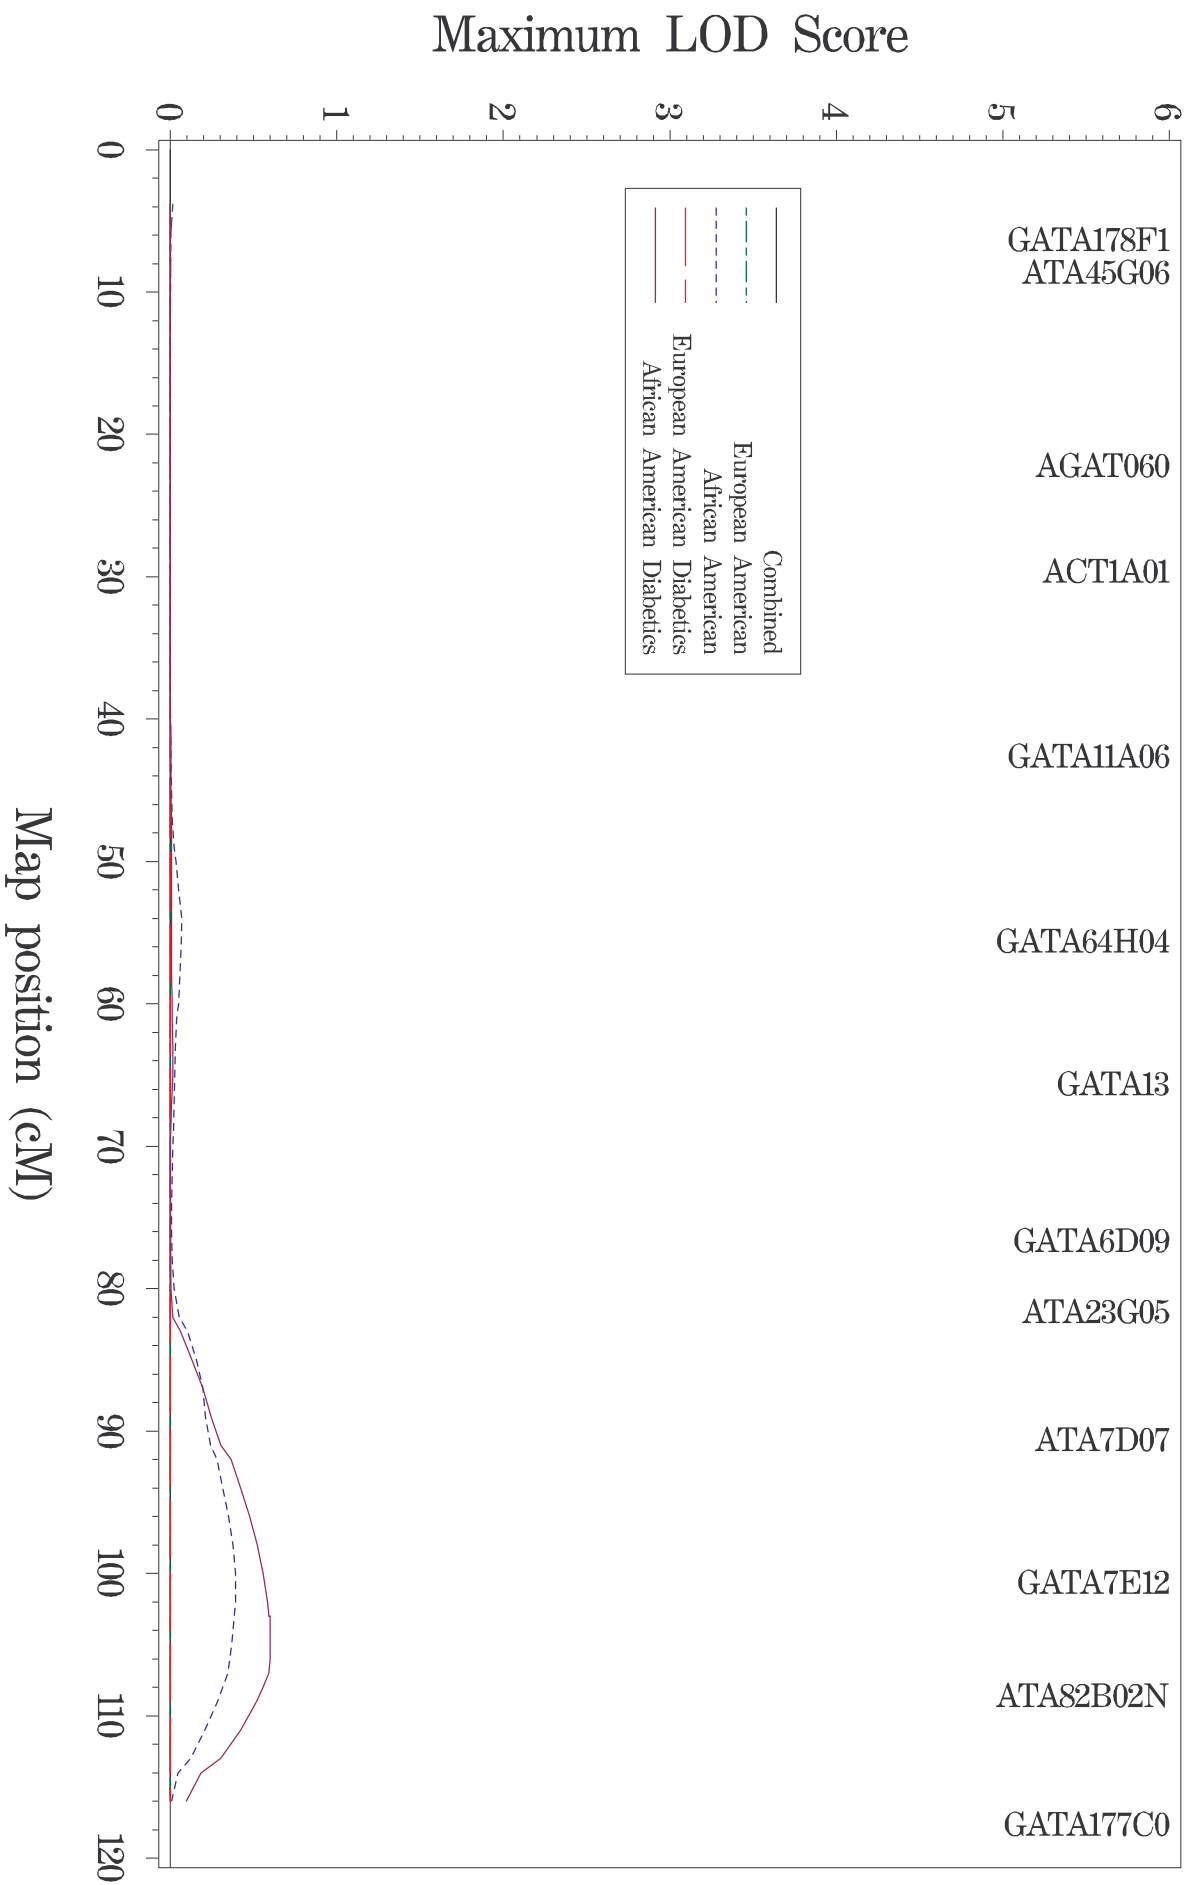

# QTL Linkage Analysis of IMT Chromosome 19

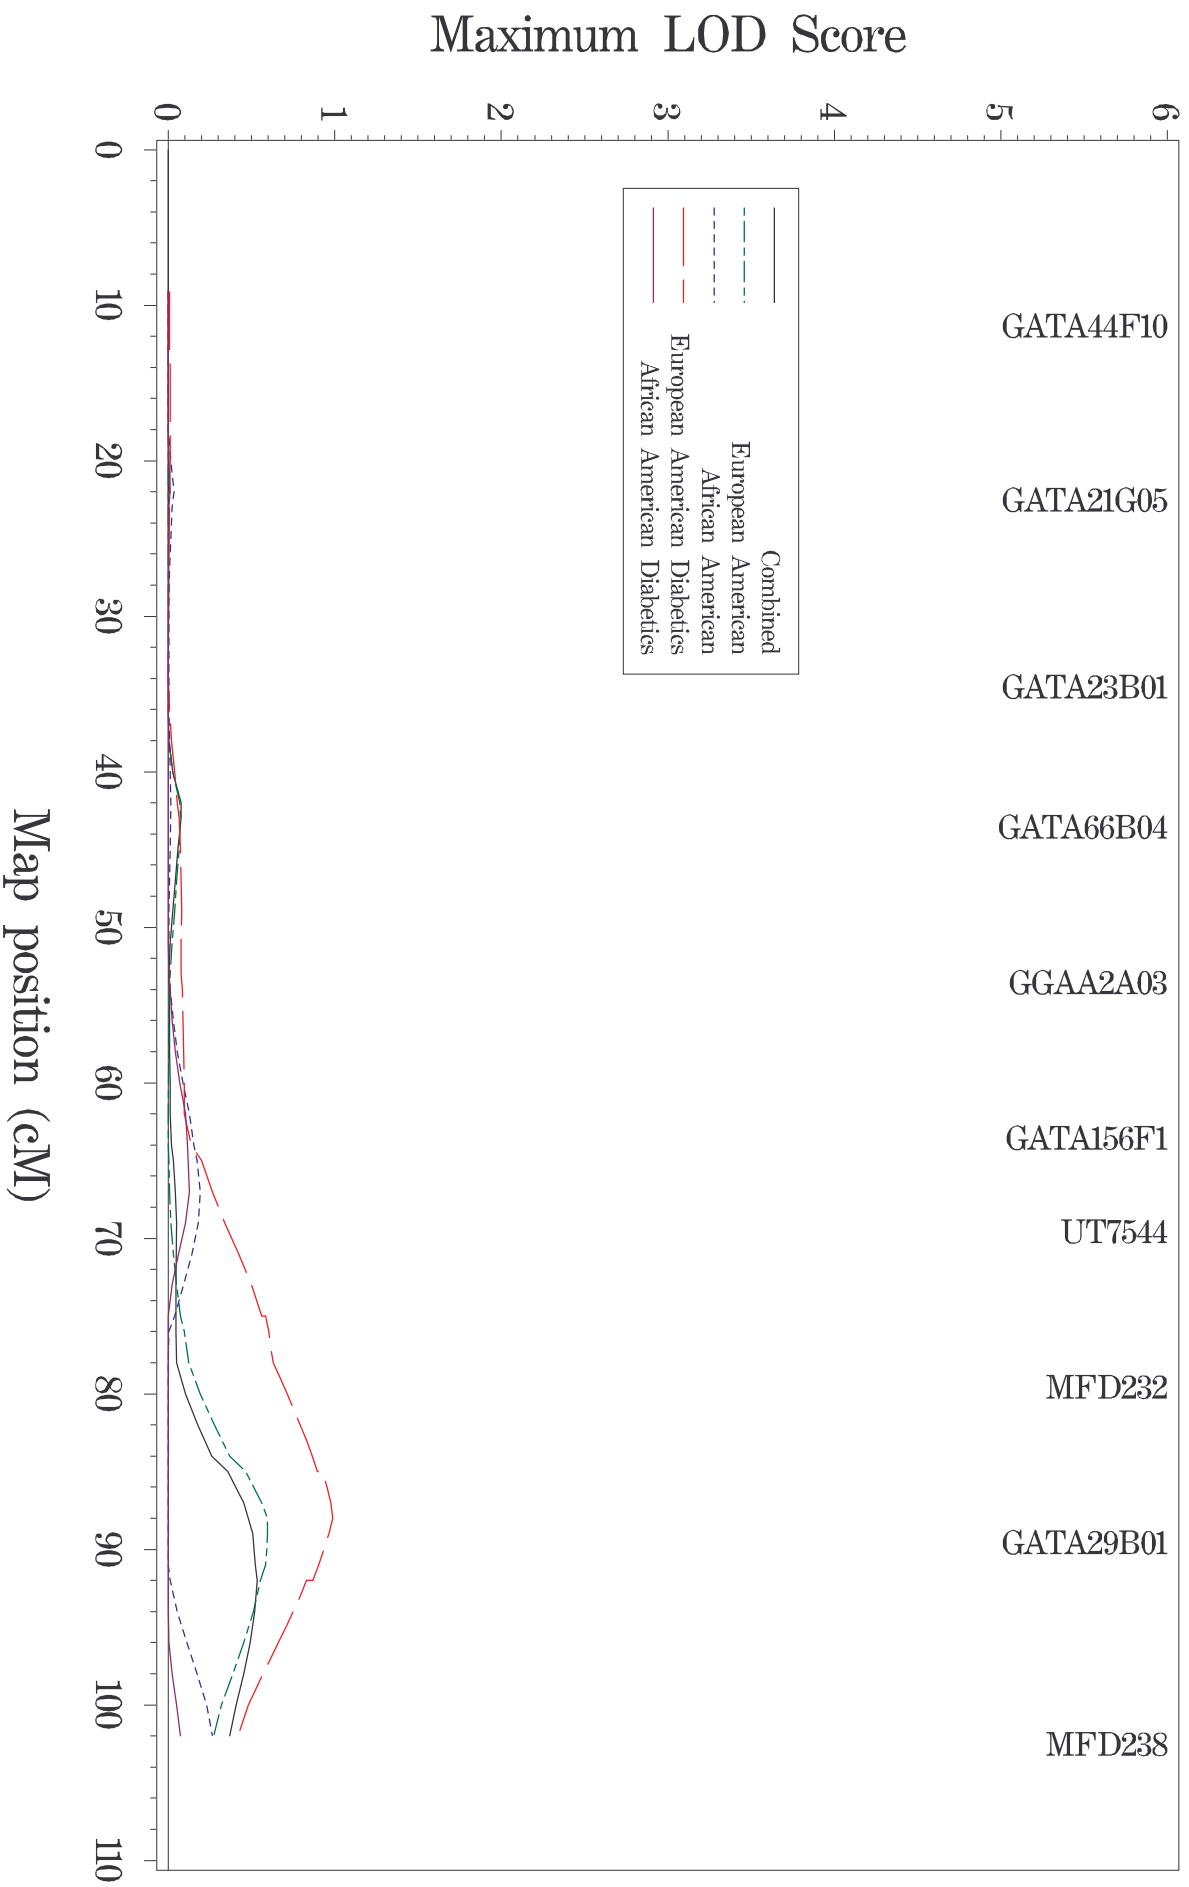

# QTL Linkage Analysis of IMT Chromosome 20

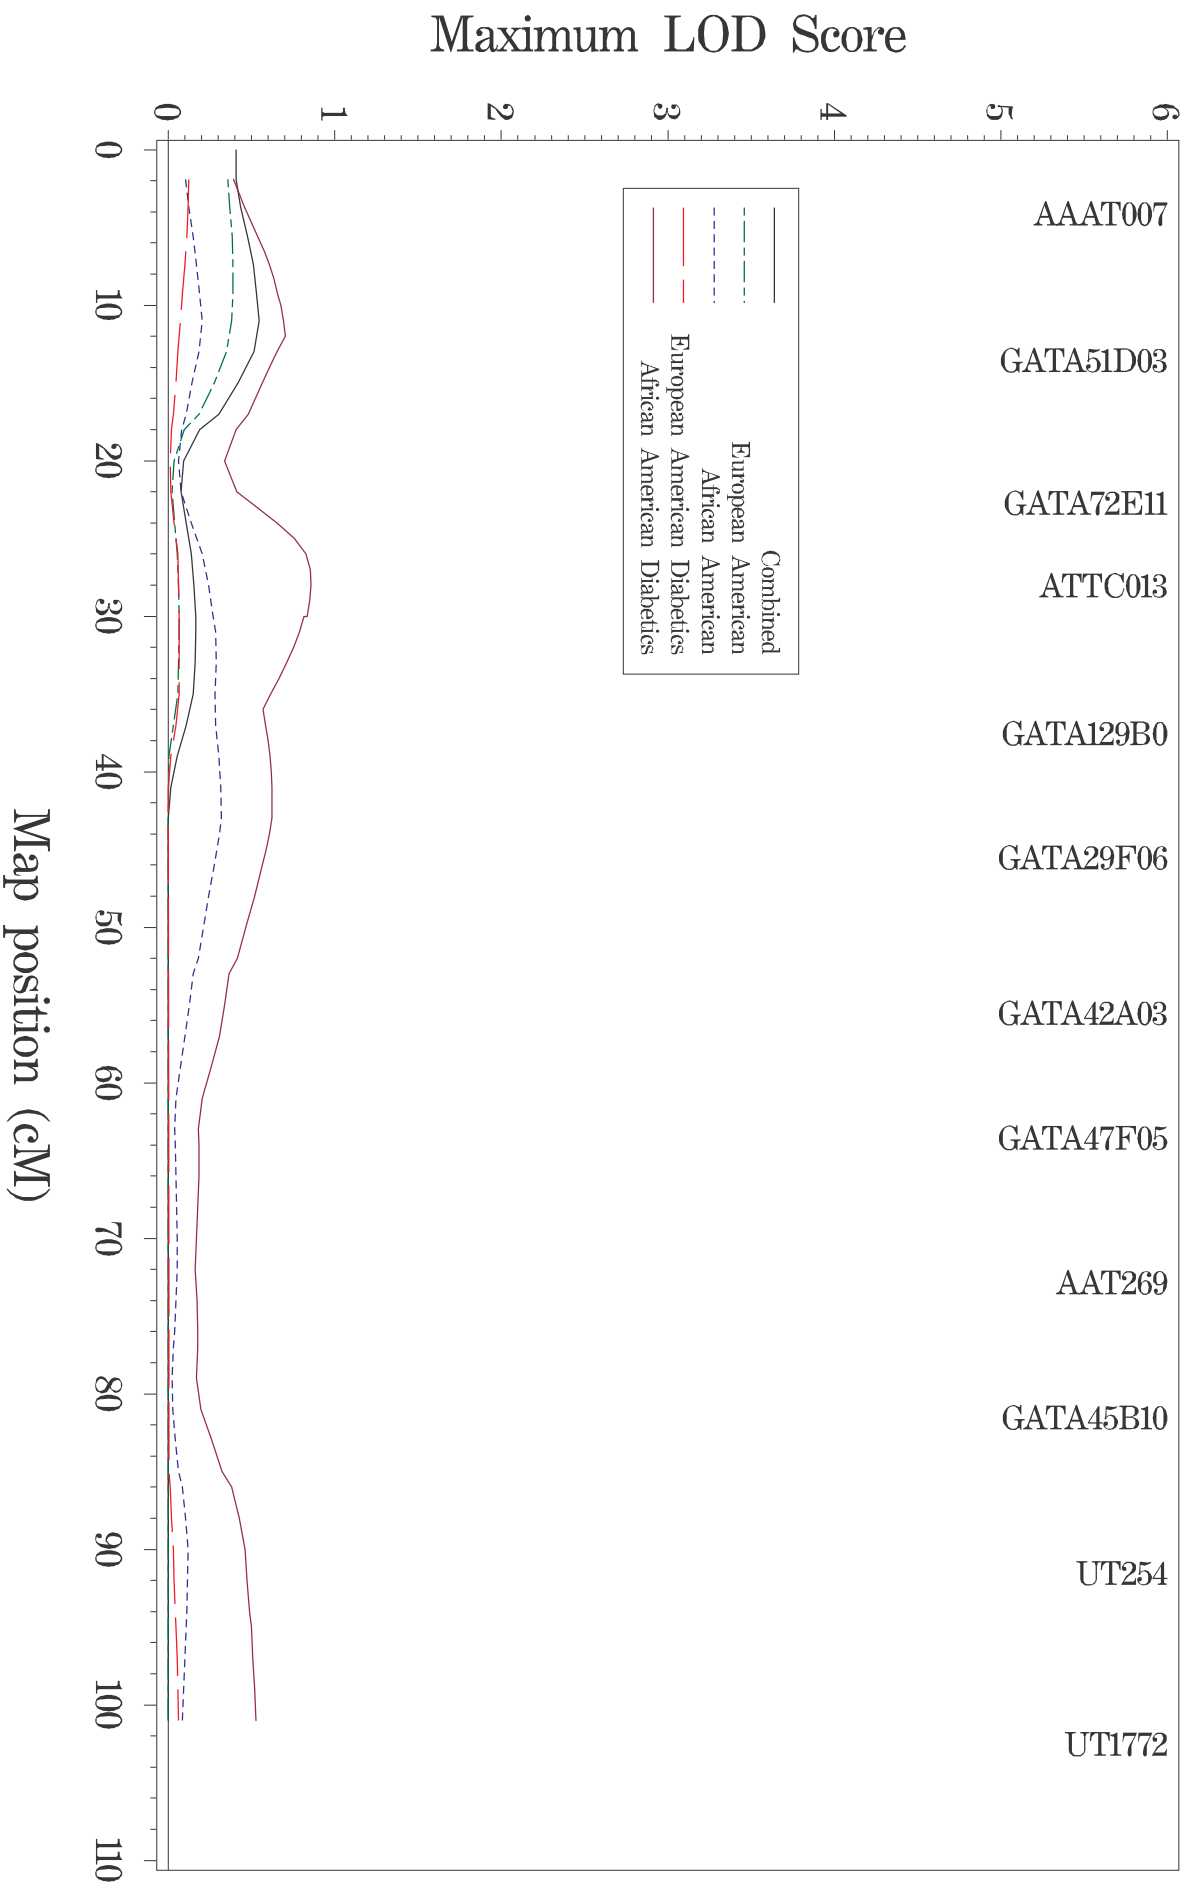

# QTL Linkage Analysis of IMT Chromosome 21

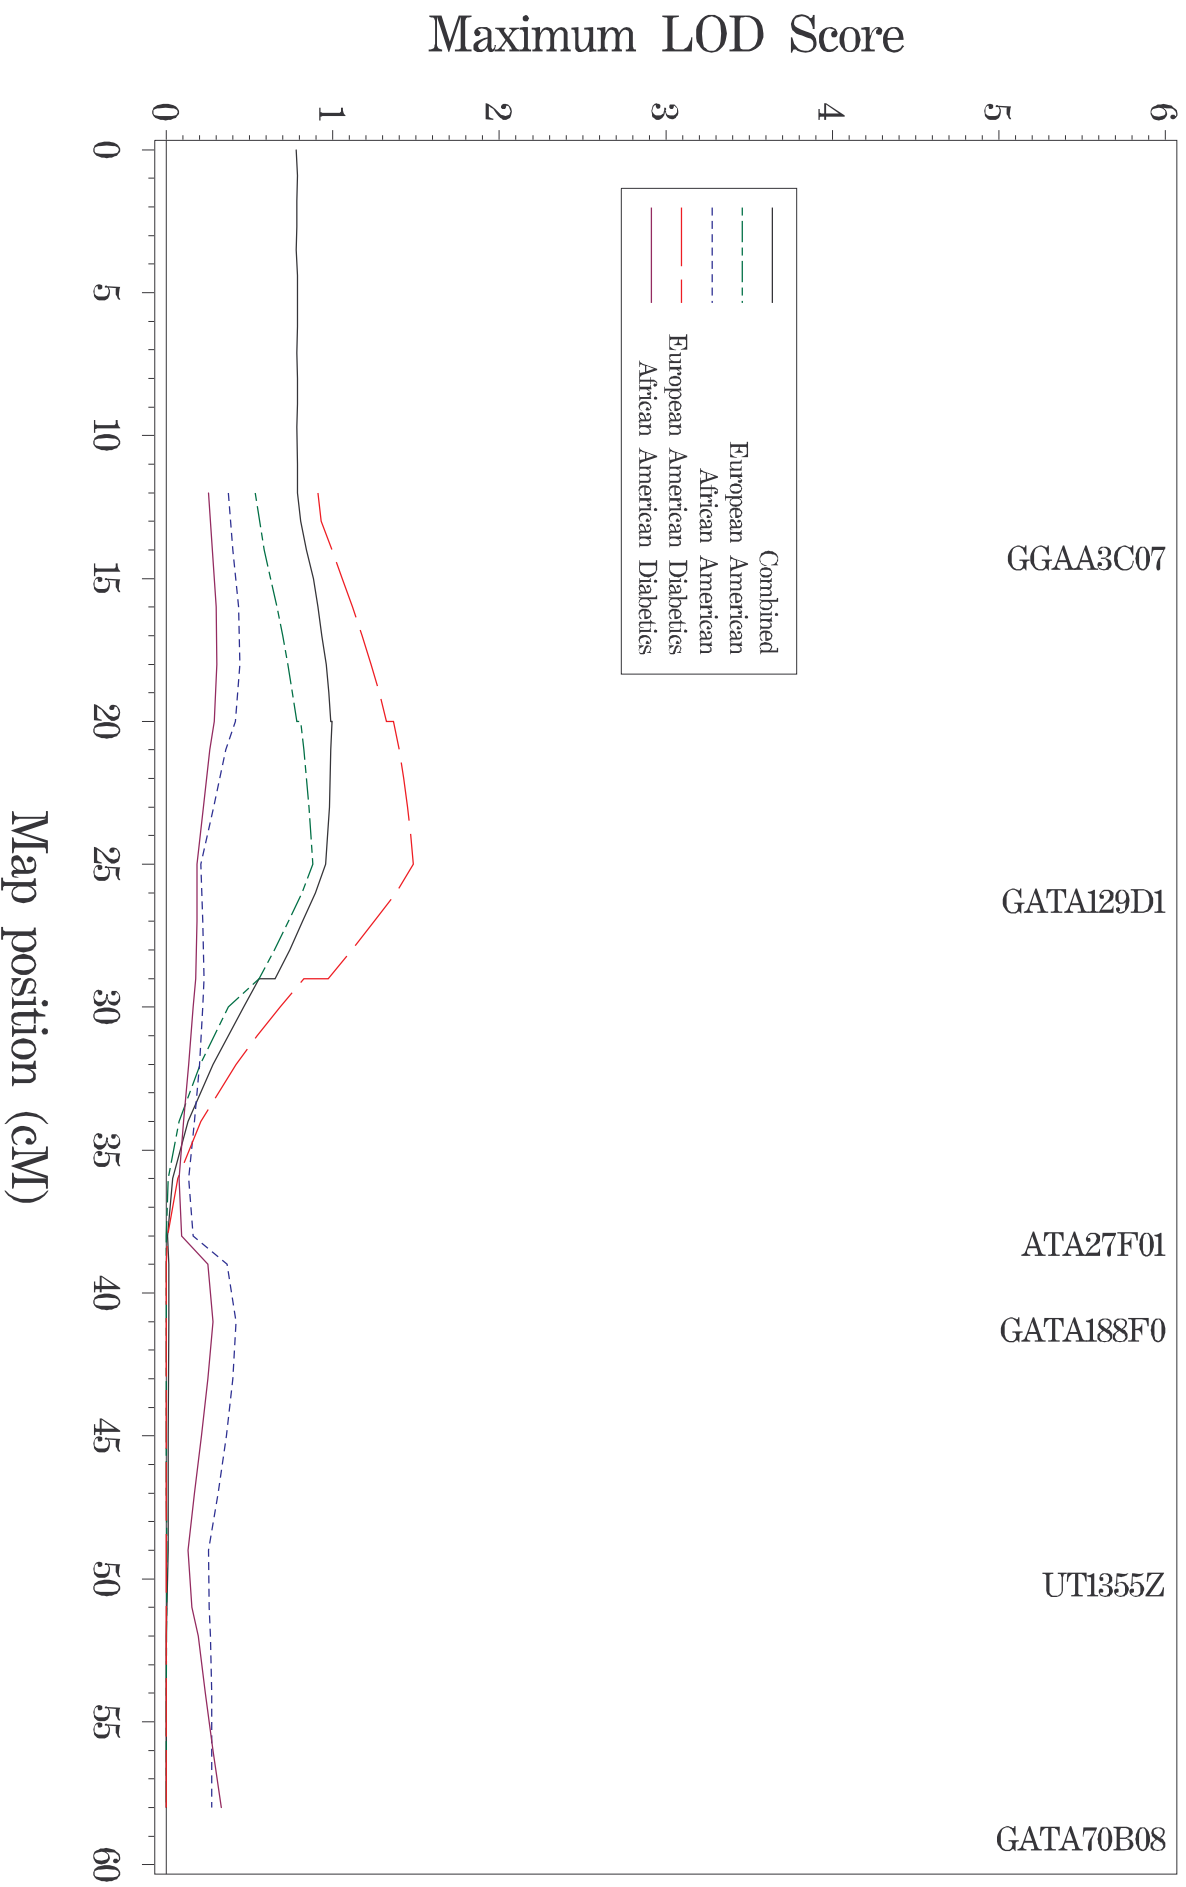

# QTL Linkage Analysis of IMT Chromosome 22

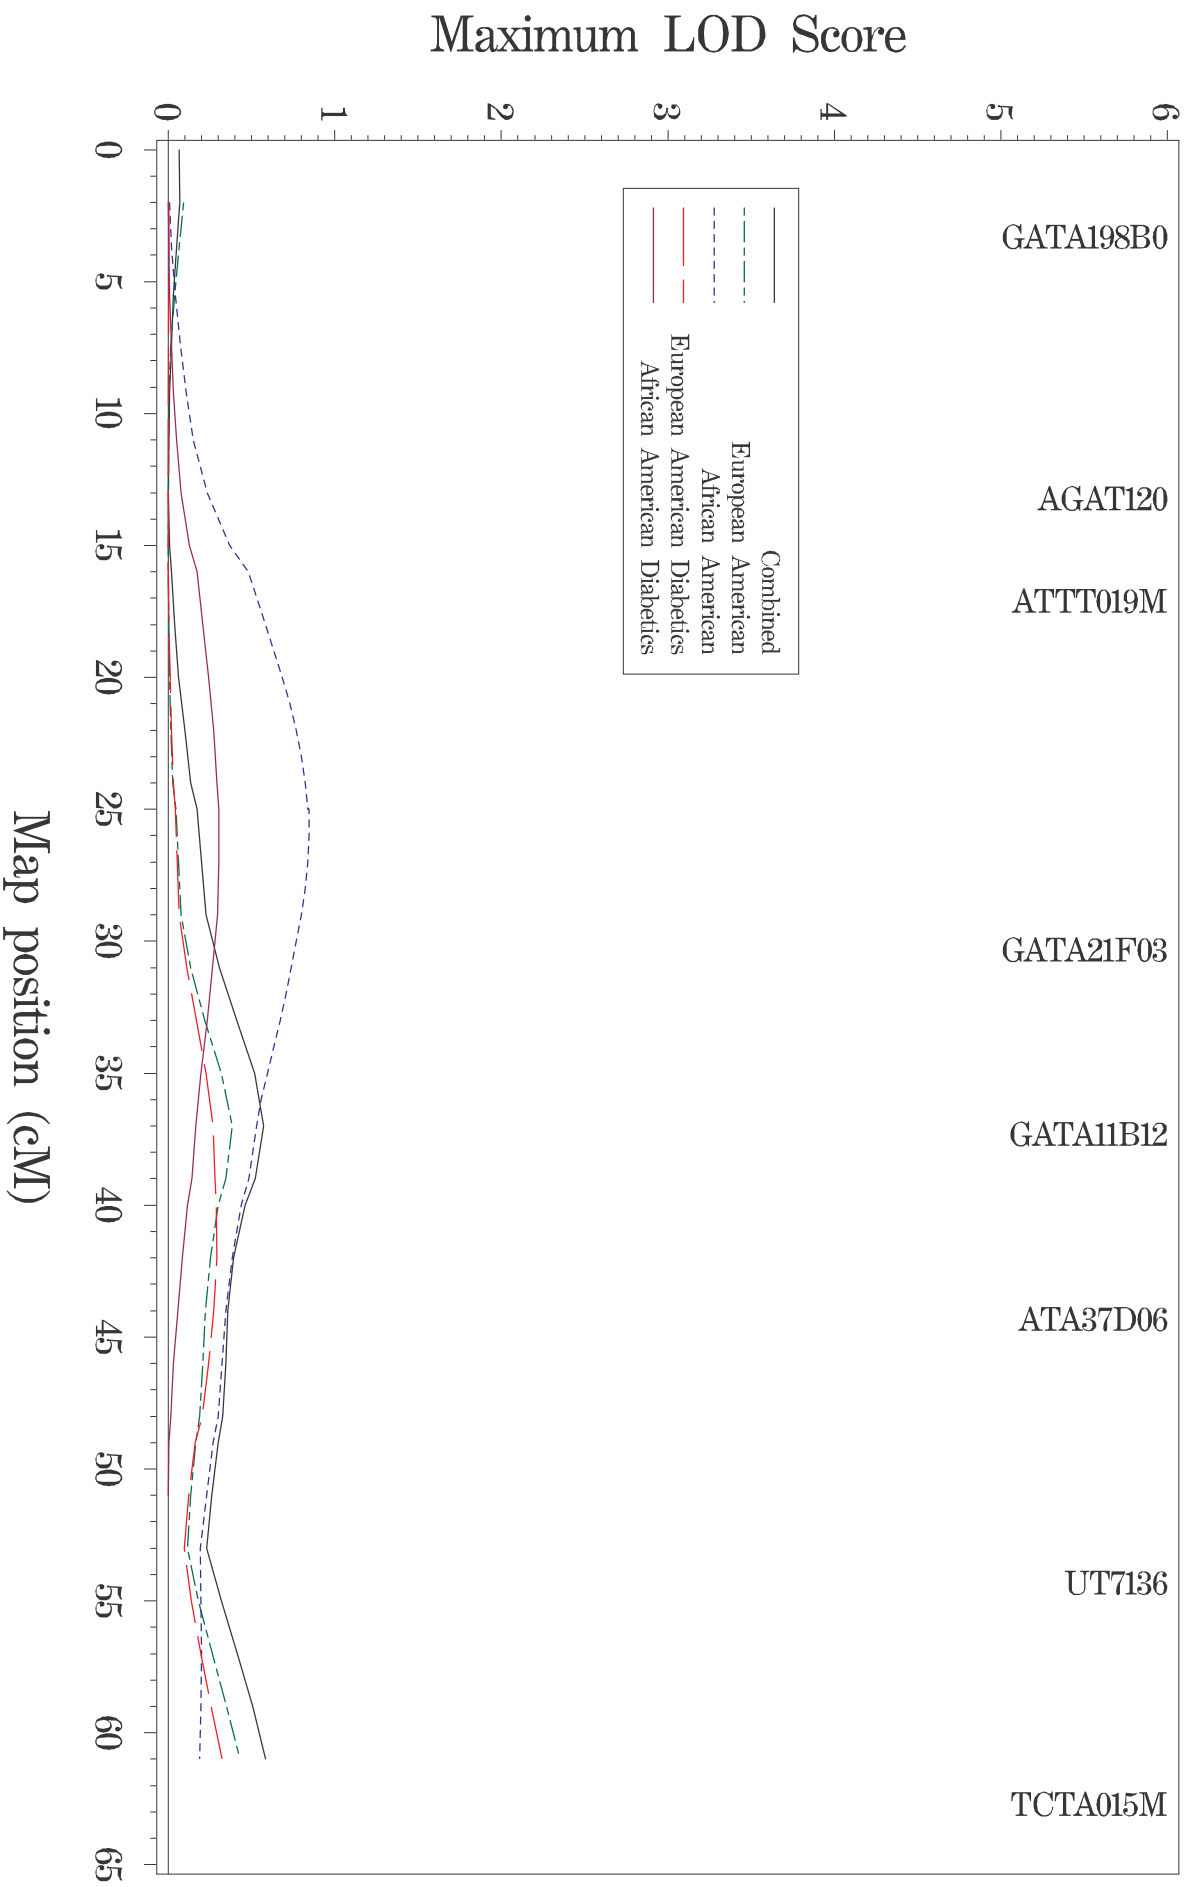

Supplement: NIHMS788218-supplement-Supp_Fig_1e.pdf [file NIHMS788218-supplement-Supp_Fig_1e.pdf]
